# Supplementary material for: An easily removable stereo-dictating group for enantioselective synthesis of propargylic amines
Source: Royal Society of Chemistry journal article supplement (doi:10.1039/c3cc45118f), 2013-01-01
Supplement: c3cc45118f.pdf [file c3cc45118f.pdf]

Supporting Information

**Easily removable stereo-dictating group for enantioselective  
synthesis of propargylic amines**

Wu Fan<sup>†</sup> and Shengming Ma<sup>\*,†,‡</sup>

<sup>†</sup> Shanghai Key Laboratory of Green Chemistry and Chemical Process, Department of  
Chemistry, East China Normal University, 3663 North Zhongshan Lu, Shanghai  
200062, P. R. China

<sup>‡</sup> State Key Laboratory of Organometallic Chemistry, Shanghai Institute of Organic  
Chemistry, Chinese Academy of Sciences, 345 Lingling Lu, Shanghai 200032, P. R.  
China

Fax: (+86)21-62609305      E-mail: [masm@sioc.ac.cn](mailto:masm@sioc.ac.cn)

|                                                                  |          |
|------------------------------------------------------------------|----------|
| General information                                              | S2       |
| Experimental details and analytical data                         | S2-S25   |
| References                                                       | S25      |
| <sup>1</sup> H, <sup>13</sup> C NMR and HPLC spectra of products | S26-S103 |

**General Information.** All reactions were carried out in oven dried Schlenk tubes. CuBr (98%) was purchased from Acros and kept in a glove box; (*R,R*)-N-Pinap **3** (97%) was purchased from Stream Chemicals and kept in the glove box; 4 Å molecular sieves was purchased from Alfa Aesar and kept in the glove box after activation (heated at 450 °C for 10 h in a Muffle furnace, taken out after cooling to 200 °C and then kept in glove box to allow to cool to room temperature). Aldehydes were distilled right before use. Toluene and THF were dried over sodium wire and distilled right before use with benzophenone as the indicator. Et<sub>3</sub>N was distilled over sodium hydroxide. Other reagents were used as received without further treatment. All the temperatures are referred to the oil baths used. The petroleum ether (30-60 °C) for chromatography was distilled before use.

## Experimental details and analytical data

### (1) Preparation of (*S*)-5-(1-Pyrrolidinyl)-5-phenyl-2-methyl-3-pentyn-2-ol

#### ((*S*)-**4aa**) (fw-5-113)

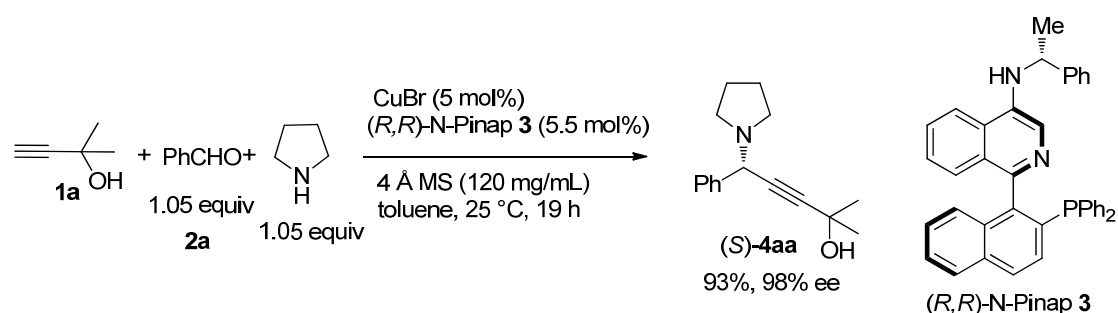

**Typical procedure:** To a flame-dried Schlenk tube were added CuBr (14.8 mg, 0.1 mmol, 98%) and (*R,R*)-N-Pinap **3** (63.6 mg, 0.11 mmol, 97%) inside a glove box. Toluene (3 mL) was then added under Ar atmosphere outside of the glove box. The Schlenk tube was then stirred 25 °C for 1 h. 4 Å molecular sieves (600.2 mg), **1a**

(169.0 mg, 2.0 mmol)/toluene (1 mL), **2a** (223.0 mg, 2.1 mmol)/toluene (0.5 mL), and pyrrolidine (149.9 mg, 2.1 mmol)/toluene (0.5 mL) were then added sequentially under Ar atmosphere. The Schlenk tube was then stirred at 25 °C until completion of the reaction as monitored by TLC (19 h). The crude reaction mixture was filtrated through a short pad of silica gel eluted with ether (30 mL). After evaporation, the residue was purified by chromatography on silica gel to afford (*S*)-**4aa** (456.3 mg, 93%) (eluent: 30-60 °C petroleum ether/ ethyl acetate/ Et<sub>3</sub>N = 400 mL/40 mL/0.26 mL to 250 mL/50 mL/0.13 mL, it should be noted that the column packed with silica gel was eluted with a mixture of petroleum ether (50 mL) and Et<sub>3</sub>N (0.25 mL) before loading the sample) as a liquid: 98% ee (HPLC conditions: Chiralcel OD-H column, hexane/*i*-PrOH = 100/1, 1.0 mL/min,  $\lambda$  = 214 nm,  $t_R$ (major) = 18.3 min,  $t_R$ (minor) = 22.2 min);  $[\alpha]_D^{20}$  = -39.0 (c = 1.00, CHCl<sub>3</sub>); <sup>1</sup>H NMR (300 MHz, CDCl<sub>3</sub>)  $\delta$  = 7.53-7.47 (m, 2 H, Ar-H), 7.37-7.23 (m, 3 H, Ar-H), 4.63 (s, 1 H, CHC $\equiv$ C), 2.61-2.54 (m, 4 H, from two CH<sub>2</sub>), 2.17 (bs, 1 H, OH), 1.83-1.69 (m, 4 H, from two CH<sub>2</sub>), 1.57 (s, 6 H, OC(CH<sub>3</sub>)<sub>2</sub>); <sup>13</sup>C NMR (75 MHz, CDCl<sub>3</sub>)  $\delta$  = 139.0, 128.1, 127.9, 127.3, 91.7, 78.7, 64.7, 58.3, 50.0, 31.6, 23.1; MS (ESI)  $m/z$  = 244 (M+H<sup>+</sup>); IR (neat):  $\nu$  = 3373, 2973, 2932, 2876, 2807, 1603, 1492, 1452, 1360, 1345, 1302, 1266, 1229, 1166, 1131, 1076, 1025 cm<sup>-1</sup>; HRMS (ESI) calcd for C<sub>16</sub>H<sub>21</sub>NO [M<sup>+</sup>]: 243.1623, found : 243.1624.

The following compounds ((*S*)-**4ab**-(*S*)-**4am** in Table 1 and (*S*)-**4bm**-(*S*)-**4dm** in Table 2) were prepared according to this **Typical procedure**. All the racemic products were also prepared according to this procedure in the absence of the chiral ligand. The absolute configurations of propargylic amines were assigned based on our previous

study.<sup>1</sup>

**(2) (S)-5-(1-Pyrrolidiny)-5-(4-bromophenyl)-2-methyl-3-pentyn-2-ol ((S)-4ab)**

**(fw-5-126)**

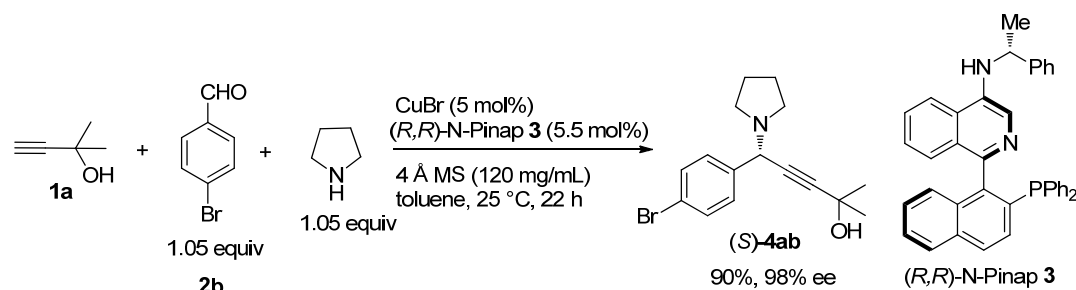

The reaction of CuBr (14.8 mg, 0.1 mmol, 98%), (*R,R*)-N-Pinap **3** (63.9 mg, 0.11 mmol, 97%), 4 Å molecular sieves (600.7 mg), **1a** (167.5 mg, 2.0 mmol), **2b** (387.9 mg, 2.1 mmol), pyrrolidine (149.4 mg, 2.1 mmol) and toluene (5 mL) afforded (*S*)-**4ab** (574.8 mg, 90%) (eluent: petroleum ether (30~60 °C)/ ethyl acetate/ Et<sub>3</sub>N = 400 mL/40 mL/0.26 mL to 250 mL/50 mL/0.13 mL, it should be noted that the column packed with silica gel was eluted with a mixture of petroleum ether (50 mL) and Et<sub>3</sub>N (0.5 mL) before loading the sample) as a liquid: 98% ee (HPLC conditions: Chiralcel AD-H column, hexane/*i*-PrOH = 90/10, 1.0 mL/min, λ = 214 nm, *t*<sub>R</sub>(major) = 6.9 min, *t*<sub>R</sub>(minor) = 5.2 min); [α]<sub>D</sub><sup>23</sup> = -32.1 (c = 1.06, CHCl<sub>3</sub>); <sup>1</sup>H NMR (300 MHz, CDCl<sub>3</sub>) δ = 7.48-7.36 (m, 4 H, Ar-H), 4.60 (s, 1 H, CHC≡C), 2.62-2.49 (m, 4 H, from two CH<sub>2</sub>), 2.14 (bs, 1 H, OH), 1.83-1.69 (m, 4 H, from two CH<sub>2</sub>), 1.57 (s, 6 H, OC(CH<sub>3</sub>)<sub>2</sub>); <sup>13</sup>C NMR (75 MHz, CDCl<sub>3</sub>) δ = 138.1, 131.0, 129.8, 121.2, 92.1, 78.0, 64.7, 57.6, 49.9, 31.6, 23.2; MS (ESI) *m/z* = 324 (M(<sup>81</sup>Br)+H<sup>+</sup>), 322 (M(<sup>79</sup>Br)+H<sup>+</sup>); IR (neat): ν = 3363, 2973, 2932, 2875, 2809, 1591, 1485, 1459, 1398, 1374, 1360, 1286, 1262, 1229, 1166, 1131, 1071, 1030, 1011 cm<sup>-1</sup>; HRMS (ESI) calcd for C<sub>16</sub>H<sub>21</sub><sup>79</sup>BrNO



$[M+H]^+$ : 322.0801, found : 322.0805.

**(3) (*S*)-5-(1-Pyrrolidiny)-5-(4-chlorophenyl)-2-methyl-3-pentyn-2-ol ((*S*)-**4ac**)**

**(fw-5-127)**

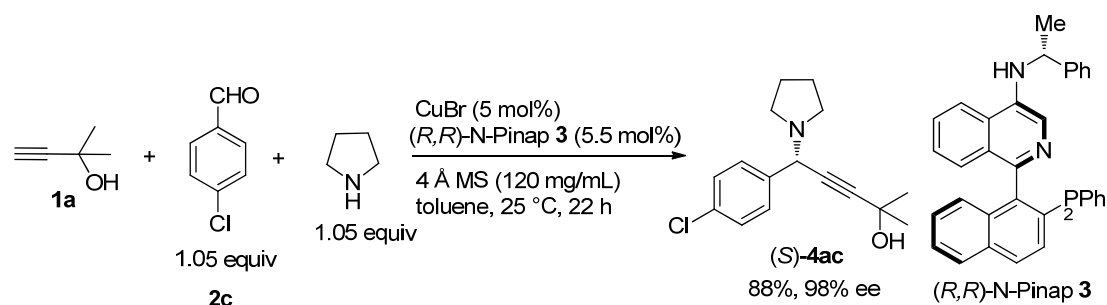

The reaction of CuBr (14.7 mg, 0.1 mmol, 98%), (*R,R*)-N-Pinap **3** (63.7 mg, 0.11 mmol, 97%), 4 Å molecular sieves (600.1 mg), **1a** (167.5 mg, 2.0 mmol), **2c** (295.3 mg, 2.1 mmol), pyrrolidine (149.9 mg, 2.1 mmol) and toluene (5 mL) afforded (*S*)-**4ac** (489.0 mg, 88%) (eluent: petroleum ether (30~60 °C)/ ethyl acetate/ Et<sub>3</sub>N = 400 mL/40 mL/0.26 mL to 250 mL/50 mL/0.13 mL, it should be noted that the column packed with silica gel was eluted with a mixture of petroleum ether (50 mL) and Et<sub>3</sub>N (0.5 mL) before loading the sample) as a liquid: 98% ee (HPLC conditions: Chiralcel AD-H column, hexane/*i*-PrOH = 90/10, 1.0 mL/min,  $\lambda$  = 214 nm,  $t_R$ (major) = 6.6 min,  $t_R$ (minor) = 5.0 min);  $[\alpha]_D^{23}$  = -35.9 ( $c$  = 1.06, CHCl<sub>3</sub>); <sup>1</sup>H NMR (300 MHz, CDCl<sub>3</sub>)  $\delta$  = 7.48-7.41 (m, 2 H, Ar-H), 7.33-7.26 (m, 2 H, Ar-H), 4.62 (s, 1 H, CHC≡C), 2.60-2.48 (m, 4 H, from two CH<sub>2</sub>), 2.08 (bs, 1 H, OH), 1.83-1.69 (m, 4 H, from two CH<sub>2</sub>), 1.57 (s, 6 H, OC(CH<sub>3</sub>)<sub>2</sub>); <sup>13</sup>C NMR (75 MHz, CDCl<sub>3</sub>)  $\delta$  = 137.7, 133.1, 129.4, 128.2, 92.1, 78.2, 64.9, 57.6, 49.9, 31.7, 23.2; MS (ESI)  $m/z$  = 280 ( $M(^{37}\text{Cl})+H^+$ ), 278 ( $M(^{35}\text{Cl})+H^+$ ); IR (neat):  $\nu$  = 3360, 2974, 2932, 2876, 2809, 1595, 1578, 1489, 1460, 1403, 1374, 1360, 1288, 1263, 1228, 1166, 1132, 1089, 1030, 1015

$\text{cm}^{-1}$ ; HRMS (ESI) calcd for  $\text{C}_{16}\text{H}_{21}^{35}\text{ClNO}$   $[\text{M}+\text{H}^+]$ : 278.1306, found: 278.1313.

**(4) (S)-5-(1-Pyrrolidinyl)-5-(4-benzyloxyphenyl)-2-methyl-3-pentyn-2-ol ((S)-4ad)**

**(fw-5-139)**

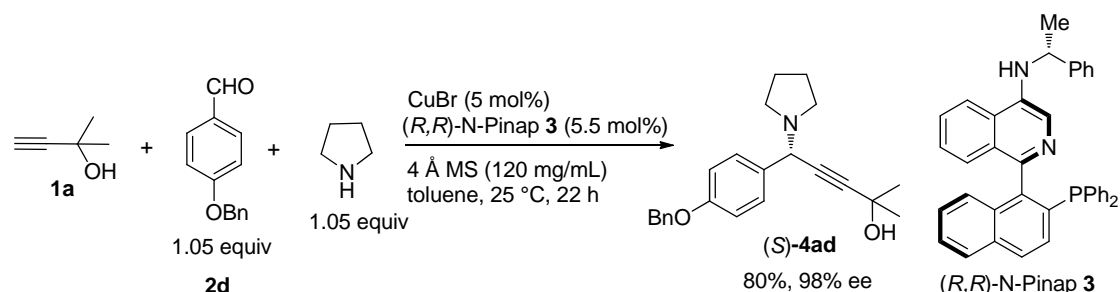

The reaction of CuBr (14.8 mg, 0.1 mmol, 98%), (R,R)-N-Pinap **3** (63.9 mg, 0.11 mmol, 97%), 4 Å molecular sieves (600.1 mg), **1a** (168.4 mg, 2.0 mmol), **2d** (445.8 mg, 2.1 mmol), pyrrolidine (150.0 mg, 2.1 mmol) and toluene (5 mL) afforded (S)-**4ad** (560.0 mg, 80%) (eluent: petroleum ether (30~60 °C)/ ethyl acetate/  $\text{Et}_3\text{N}$  = 400 mL/80 mL/0.26 mL, it should be noted that the column packed with silica gel was eluted with a mixture of petroleum ether (50 mL) and  $\text{Et}_3\text{N}$  (0.5 mL) before loading the sample) as a liquid: 98% ee (HPLC conditions: Chiralcel AD-H column, hexane/*i*-PrOH = 90/10, 1.0 mL/min,  $\lambda$  = 214 nm,  $t_{\text{R}}(\text{major})$  = 19.4 min,  $t_{\text{R}}(\text{minor})$  = 12.3 min);  $[\alpha]_{\text{D}}^{20}$  = -20.3 ( $c$  = 1.02,  $\text{CHCl}_3$ );  $^1\text{H}$  NMR (300 MHz,  $\text{CDCl}_3$ )  $\delta$  = 7.46-7.28 (m, 7 H, Ar-H), 6.97-6.90 (m, 2 H, Ar-H), 5.06 (s, 2 H,  $\text{OCH}_2$ ), 4.58 (s, 1 H,  $\text{CHC}\equiv\text{C}$ ), 2.62-2.49 (m, 4 H, from two  $\text{CH}_2$ ), 1.97 (s, 1 H, OH), 1.83-1.69 (m, 4 H, from two  $\text{CH}_2$ ), 1.57 (s, 6 H,  $\text{OC}(\text{CH}_3)_2$ );  $^{13}\text{C}$  NMR (75 MHz,  $\text{CDCl}_3$ )  $\delta$  = 158.1, 136.9, 131.8, 129.3, 128.5, 127.9, 127.4, 114.3, 91.4, 79.3, 69.9, 65.1, 57.8, 50.1, 31.7, 23.3; MS (ESI)  $m/z$  = 350 ( $\text{M}+\text{H}^+$ ); IR (neat):  $\nu$  = 3373, 2973, 2931, 2874, 2806, 1609,

1584, 1508, 1455, 1418, 1377, 1360, 1345, 1301, 1269, 1235, 1170, 1132, 1112, 1013  
cm<sup>-1</sup>; HRMS (ESI) calcd for C<sub>23</sub>H<sub>27</sub>NO<sub>2</sub> [M<sup>+</sup>]: 349.2042, found: 349.2031.

**(5) (S)-5-(1-Pyrrolidiny)-5-(3-methylphenyl)-2-methyl-3-pentyn-2-ol ((S)-4ae)**

**(fw-5-130)**

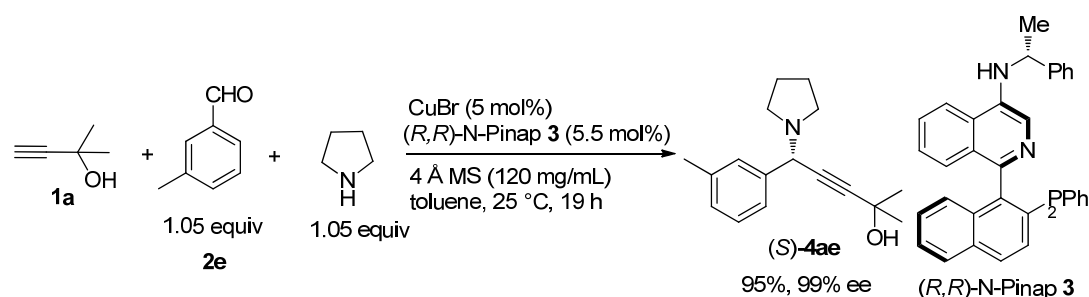

The reaction of CuBr (14.7 mg, 0.1 mmol, 98%), (R,R)-N-Pinap **3** (63.9 mg, 0.11 mmol, 97%), 4 Å molecular sieves (600.2 mg), **1a** (168.8 mg, 2.0 mmol), **2e** (252.0 mg, 2.1 mmol), pyrrolidine (149.7 mg, 2.1 mmol) and toluene (5 mL) afforded (S)-4ae (490.5 mg, 95%) (eluent: petroleum ether (30~60 °C)/ ethyl acetate/ Et<sub>3</sub>N = 400 mL/40 mL/0.26 mL to 250 mL/50 mL/0.13 mL, it should be noted that the column packed with silica gel was eluted with a mixture of petroleum ether (50 mL) and Et<sub>3</sub>N (0.5 mL) before loading the sample) as a liquid: 99% ee (HPLC conditions: Chiralcel AD-H column, hexane/*i*-PrOH = 90/10, 1.0 mL/min, λ = 214 nm, *t*<sub>R</sub>(major) = 5.1 min, *t*<sub>R</sub>(minor) = 4.5 min); [α]<sub>D</sub><sup>19</sup> = -33.9 (c = 1.01, CHCl<sub>3</sub>); <sup>1</sup>H NMR (300 MHz, CDCl<sub>3</sub>) δ = 7.29 (d, *J* = 6.0 Hz, 2 H, Ar-H), 7.25-7.18 (m, 1 H, Ar-H), 7.09 (d, *J* = 7.5 Hz, 1 H, Ar-H), 4.57 (s, 1 H, CHC≡C), 2.63-2.49 (m, 4 H, from two CH<sub>2</sub>), 2.35 (s, 3 H, Ar-CH<sub>3</sub>), 2.05 (bs, 1 H, OH), 1.83-1.69 (m, 4 H, from two CH<sub>2</sub>), 1.57 (s, 6 H, OC(CH<sub>3</sub>)<sub>2</sub>); <sup>13</sup>C NMR (75 MHz, CDCl<sub>3</sub>) δ = 139.1, 137.7, 128.8, 128.2, 127.9, 125.2, 91.4, 79.1, 65.0, 58.5, 50.2, 31.7, 23.2, 21.3; MS (ESI) *m/z* = 258 (M+H<sup>+</sup>); IR (neat):

$\nu = 3380, 2973, 2931, 2875, 2807, 1608, 1487, 1458, 1374, 1360, 1345, 1304, 1270, 1227, 1166, 1131, 1090, 1031 \text{ cm}^{-1}$ ; HRMS (ESI) calcd for  $\text{C}_{17}\text{H}_{24}\text{NO}$   $[\text{M}+\text{H}^+]$ : 258.1852, found 258.1858.

**(6) (S)-5-(1-Pyrrolidinyl)-5-(2-methylphenyl)-2-methyl-3-pentyn-2-ol ((S)-4af)**

**(fw-5-135)**

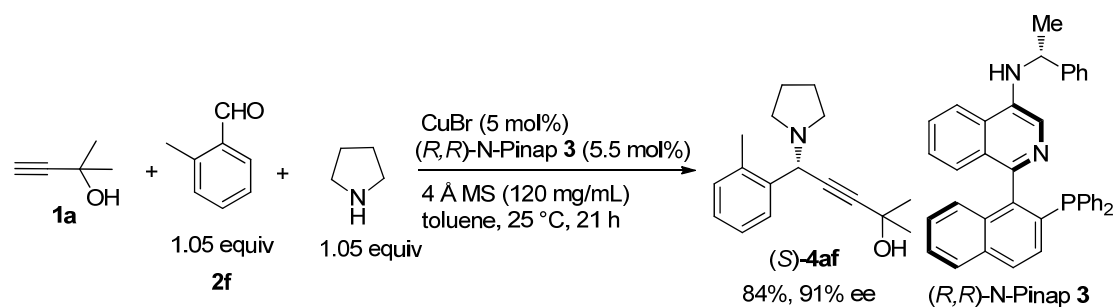

The reaction of CuBr (14.8 mg, 0.1 mmol, 98%), (R,R)-N-Pinap **3** (63.9 mg, 0.11 mmol, 97%), 4 Å molecular sieves (600.0 mg), **1a** (168.7 mg, 2.0 mmol), **2f** (252.8 mg, 2.1 mmol), pyrrolidine (150.0 mg, 2.1 mmol) and toluene (5 mL) afforded (S)-**4ae** (432.4 mg, 84%) (eluent: petroleum ether (30~60 °C)/ ethyl acetate/  $\text{Et}_3\text{N}$  = 400 mL/20 mL/0.26 mL to 400 mL /40 mL/0.26 mL, it should be noted that the column packed with silica gel was eluted with a mixture of petroleum ether (50 mL) and  $\text{Et}_3\text{N}$  (0.5 mL) before loading the sample) as a liquid: 91% ee (HPLC conditions: Chiralcel AD-H column, hexane/*i*-PrOH = 90/10, 0.7 mL/min,  $\lambda = 214 \text{ nm}$ ,  $t_{\text{R}}(\text{major}) = 8.1 \text{ min}$ ,  $t_{\text{R}}(\text{minor}) = 7.6 \text{ min}$ );  $[\alpha]_{\text{D}}^{19} = -24.5$  ( $c = 1.03$ ,  $\text{CHCl}_3$ );  $^1\text{H}$  NMR (300 MHz,  $\text{CDCl}_3$ )  $\delta = 7.58\text{--}7.52$  (m, 1 H, Ar-H), 7.22–7.10 (m, 3 H, Ar-H), 4.79 (s, 1 H,  $\text{CHC}\equiv\text{C}$ ), 2.65–2.45 (m, 4 H, from two  $\text{CH}_2$ ), 2.41 (s, 3 H, Ar- $\text{CH}_3$ ), 2.03 (bs, 1 H, OH), 1.80–1.65 (m, 4 H, from two  $\text{CH}_2$ ), 1.57 (s, 6 H,  $\text{OC}(\text{CH}_3)_2$ );  $^{13}\text{C}$  NMR (75 MHz,  $\text{CDCl}_3$ )  $\delta = 137.6, 136.6, 130.4, 128.0, 127.3, 125.5, 91.5, 79.0, 65.2, 55.4, 50.0, 31.7$ ,

23.4, 19.0; MS (ESI)  $m/z$  = 258 ( $M+H^+$ ); IR (neat):  $\nu$  = 3373, 2972, 2932, 2875, 2806, 1487, 1460, 1374, 1360, 1345, 1265, 1229, 1165, 1131, 1051, 1030,  $\text{cm}^{-1}$ ; HRMS (ESI) calcd for  $\text{C}_{17}\text{H}_{24}\text{NO}$  [ $M+H^+$ ]: 258.1852, found: 258.1858.

**(7) (*R*)-5-(1-Pyrrolidinyl)-5-(2-furyl)-2-methyl-3-pentyn-2-ol ((*R*)-4ag) (fw-5-123)**

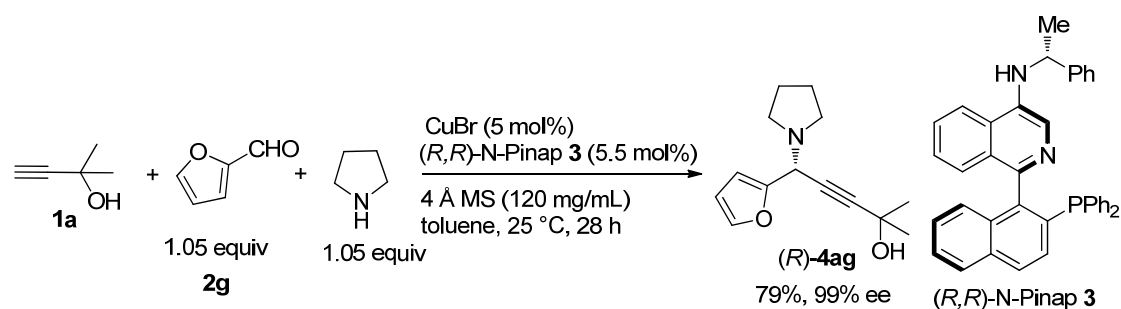

The reaction of CuBr (14.8 mg, 0.1 mmol, 98%), (*R,R*)-N-Pinap 3 (63.7 mg, 0.11 mmol, 97%), 4 Å molecular sieves (600.0 mg), 1a (168.2 mg, 2.0 mmol), 2g (202.2 mg, 2.1 mmol), pyrrolidine (149.5 mg, 2.1 mmol) and toluene (5 mL) afforded (*R*)-4ag (367.5 mg, 79%) (eluent: petroleum ether (30~60 °C)/ ethyl acetate/  $\text{Et}_3\text{N}$  = 400 mL/40 mL/0.26 mL to 250 mL/50 mL/0.13 mL, it should be noted that the column packed with silica gel was eluted with a mixture of petroleum ether (50 mL) and  $\text{Et}_3\text{N}$  (0.5 mL) before loading the sample) as a liquid: 99% ee (HPLC conditions: Chiralcel AD-H column, hexane/*i*-PrOH = 95/5, 1.0 mL/min,  $\lambda$  = 214 nm,  $t_R$ (major) = 8.9 min,  $t_R$ (minor) = 8.1 min);  $[\alpha]_D^{19}$  = -26.3 ( $c$  = 1.02,  $\text{CHCl}_3$ );  $^1\text{H}$  NMR (300 MHz,  $\text{CDCl}_3$ )  $\delta$  = 7.40-7.36 (m, 1 H, Ar-H), 6.38-6.35 (m, 1 H, Ar-H), 6.34-6.30 (m, 1 H, Ar-H), 4.81 (s, 1 H,  $\text{CHC}\equiv\text{C}$ ), 2.70-2.55 (m, 4 H, from two  $\text{CH}_2$ ), 2.15 (bs, 1 H, OH), 1.80-1.72 (m, 4 H, from two  $\text{CH}_2$ ), 1.57 (s, 6 H,  $\text{OC}(\text{CH}_3)_2$ );  $^{13}\text{C}$  NMR (75 MHz,  $\text{CDCl}_3$ )  $\delta$  = 152.2, 142.2, 109.8, 107.9, 90.7, 76.3, 64.9, 51.7, 49.6, 31.5, 23.3; MS (ESI)  $m/z$  = 234 ( $M+H^+$ ); IR (neat):  $\nu$  = 3380, 2975, 2933, 2877, 2813, 1502, 1460,

1374, 1360, 1347, 1293, 1228, 1169, 1142, 1073, 1031, 1006  $\text{cm}^{-1}$ ; HRMS (ESI) calcd for  $\text{C}_{14}\text{H}_{19}\text{NO}_2$  [ $\text{M}^+$ ]: 233.1416, found: 233.1415.

**(8) (S)-5-(1-Pyrrolidiny)-2-methyl-3-nonyn-2-ol ((S)-4ah) (fw-5-118)**

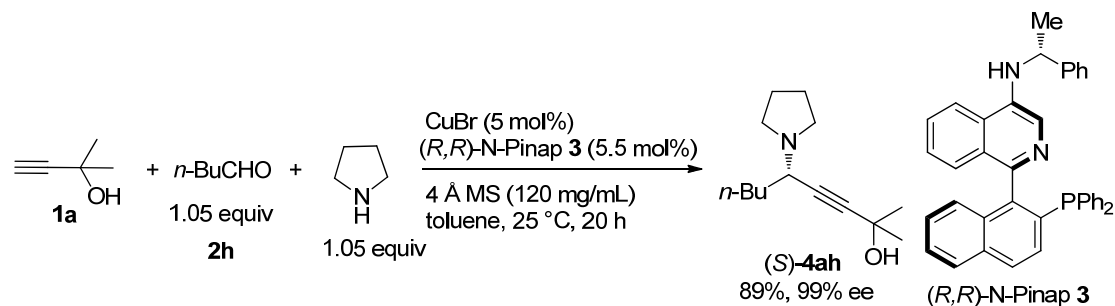

The reaction of CuBr (14.7 mg, 0.1 mmol, 98%), (R,R)-N-Pinap 3 (63.7 mg, 0.11 mmol, 97%), 4 Å molecular sieves (600.5 mg), **1a** (168.9 mg, 2.0 mmol), **2h** (181.0 mg, 2.1 mmol), pyrrolidine (150.0 mg, 2.1 mmol) and toluene (5 mL) afforded (S)-**4ah** (399.9 mg, 89%) (eluent: petroleum ether (30~60 °C)/ ethyl acetate/  $\text{Et}_3\text{N}$  = 400 mL/40 mL/0.26 mL to 250 mL/50 mL/0.13 mL, it should be noted that the column packed with silica gel was eluted with a mixture of petroleum ether (50 mL) and  $\text{Et}_3\text{N}$  (0.5 mL) before loading the sample) as a liquid: 99% ee (HPLC conditions: Chiralcel PC-2 column, hexane/*i*-PrOH = 100/1, 1.0 mL/min,  $\lambda$  = 214 nm,  $t_{\text{R}}$ (major) = 12.8 min,  $t_{\text{R}}$ (minor) = 15.0 min);  $[\alpha]_{\text{D}}^{22}$  = -7.0 ( $c$  = 1.03,  $\text{CHCl}_3$ );  $^1\text{H}$  NMR (300 MHz,  $\text{CDCl}_3$ )  $\delta$  = 3.43 (dd,  $J_1$  = 8.9 Hz,  $J_2$  = 5.6 Hz, 1 H,  $\text{CHC}\equiv\text{C}$ ), 2.73-2.50 (m, 4 H, from two  $\text{CH}_2$ ), 1.95 (bs, 1 H, OH), 1.85-1.24 (m, 16 H, from five  $\text{CH}_2$  and  $\text{OC}(\text{CH}_3)_2$ ), 0.91 (t,  $J$  = 7.1 Hz, 3 H,  $\text{CH}_3$ );  $^{13}\text{C}$  NMR (75 MHz,  $\text{CDCl}_3$ )  $\delta$  = 90.4, 79.5, 64.3, 54.3, 49.3, 34.3, 31.8, 28.7, 23.2, 22.2, 13.8; MS (ESI)  $m/z$  = 224 ( $\text{M}+\text{H}^+$ ); IR (neat):  $\nu$  = 3405, 2958, 2931, 2873, 2862, 2808, 1459, 1373, 1359, 1323, 1293, 1226, 1167, 1136, 1105, 1031  $\text{cm}^{-1}$ ; HRMS (ESI) calcd for  $\text{C}_{14}\text{H}_{25}\text{NO}$  [ $\text{M}^+$ ]: 223.1936, found: 223.1934.

**(9) (S)-5-(1-Pyrrolidinyl)-2-methyl-3-undecyn-2-ol ((S)-4ai) (fw-5-119)**

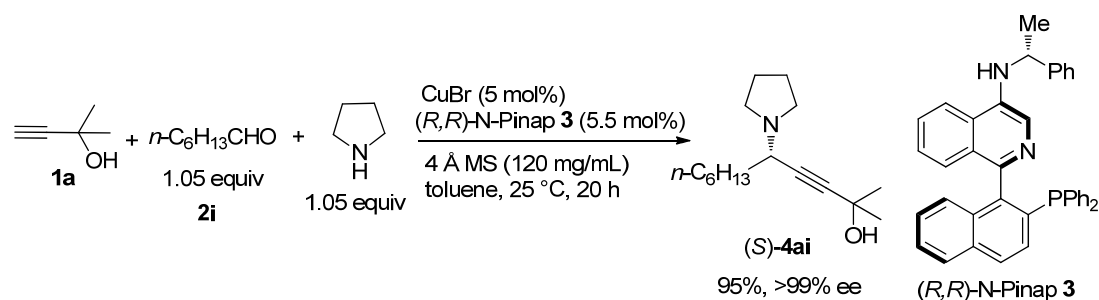

The reaction of CuBr (14.8 mg, 0.1 mmol, 98%), (R,R)-N-Pinap **3** (63.8 mg, 0.11 mmol, 97%), 4 Å molecular sieves (600.3 mg), **1a** (168.4 mg, 2.0 mmol), **2i** (239.6 mg, 2.1 mmol), pyrrolidine (150.0 mg, 2.1 mmol) toluene (5 mL) afforded (S)-**4ai** (477.5 mg, 95%) (eluent: petroleum ether (30~60 °C)/ ethyl acetate/ Et<sub>3</sub>N = 200 mL/20 mL/0.13 mL to 250 mL/50 mL/0.13 mL, it should be noted that the column packed with silica gel was eluted with a mixture of petroleum ether (50 mL) and Et<sub>3</sub>N (0.5 mL) before loading the sample) as a liquid: > 99% ee (HPLC conditions: Chiralcel AD-H column, hexane/*i*-PrOH = 200/1, 1.0 mL/min, λ = 214 nm, *t*<sub>R</sub>(major) = 25.3 min); [α]<sub>D</sub><sup>20</sup> = -1.7 (c = 1.03, CHCl<sub>3</sub>); <sup>1</sup>H NMR (300 MHz, CDCl<sub>3</sub>) δ = 3.43 (dd, *J*<sub>1</sub> = 8.9 Hz, *J*<sub>2</sub> = 5.6 Hz, 1 H, CHC≡C), 2.70-2.50 (m, 4 H, from two CH<sub>2</sub>), 2.03 (bs, 1 H, OH), 1.84-1.72 (m, 4 H, from two CH<sub>2</sub>), 1.69-1.22 (m, 16 H, from five CH<sub>2</sub> and OC(CH<sub>3</sub>)<sub>2</sub>), 0.88 (t, *J* = 6.8 Hz, 3 H, CH<sub>3</sub>); <sup>13</sup>C NMR (75 MHz, CDCl<sub>3</sub>) δ = 90.4, 79.4, 64.3, 54.3, 49.3, 34.5, 31.8, 31.5, 28.8, 26.4, 23.2, 22.4, 13.8; MS (ESI) *m/z* = 252 (M+H<sup>+</sup>); IR (neat): ν = 3405, 2957, 2928, 2872, 2858, 2809, 1459, 1360, 1323, 1293, 1228, 1168, 1137, 1109, 1033 cm<sup>-1</sup>; HRMS (ESI) calcd for C<sub>16</sub>H<sub>29</sub>NO [M<sup>+</sup>]: 251.2249, found: 251.2255.

**(10) (S)-5-(1-Pyrrolidinyl)-2-methyl-3-dodecyn-2-ol ((S)-4aj) (fw-5-111)**

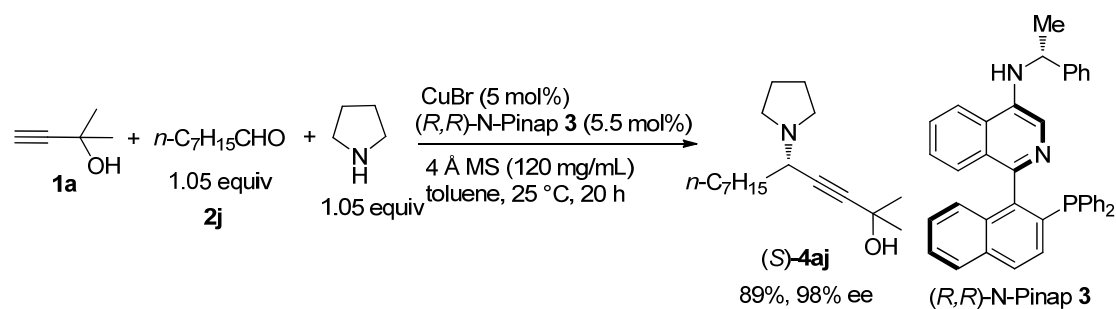

The reaction of **CuBr** (14.7 mg, 0.1 mmol, 98%), **(R,R)-N-Pinap 3** (64.0 mg, 0.11 mmol, 97%), 4 Å molecular sieves (600.1 mg), **1a** (168.9 mg, 2.0 mmol), **2j** (269.8 mg, 2.1 mmol), pyrrolidine (150.0 mg, 2.1 mmol) and toluene (5 mL) afforded **(S)-4aj** (473.2 mg, 89%) (eluent: petroleum ether/ ethyl acetate/ Et<sub>3</sub>N = 500 mL/50 mL/0.35 mL to 250 mL/50 mL/0.13 mL, it should be noted that the column packed with silica gel was eluted with a mixture of petroleum ether (50 mL) and Et<sub>3</sub>N (0.5 mL) before loading the sample) as a liquid: 98% ee (HPLC conditions: Chiralcel OD-H column, hexane/*i*-PrOH = 200/1, 1.0 mL/min, λ = 214 nm, *t<sub>R</sub>*(major) = 14.4 min, *t<sub>R</sub>*(minor) = 13.1 min); [α]<sub>D</sub><sup>19</sup> = -2.2 (c = 1.02, CHCl<sub>3</sub>); <sup>1</sup>H NMR (300 MHz, CDCl<sub>3</sub>) δ = 3.43 (dd, *J*<sub>1</sub> = 9.0 Hz, *J*<sub>2</sub> = 5.7 Hz, 1 H, CHC≡C), 2.72-2.50 (m, 4 H, from two CH<sub>2</sub>), 2.2 (bs, 1 H, OH), 1.85-1.71 (m, 4 H, from two CH<sub>2</sub>), 1.69-1.22 (m, 18 H, from six CH<sub>2</sub> and OC(CH<sub>3</sub>)<sub>2</sub>), 0.88 (t, *J* = 6.2 Hz, 3 H, CH<sub>3</sub>); <sup>13</sup>C NMR (75 MHz, CDCl<sub>3</sub>) δ = 90.2, 80.0, 64.8, 54.4, 49.5, 34.7, 31.8, 31.7, 29.3, 29.1, 26.6, 23.3, 22.6, 14.0; MS (ESI) *m/z* = 266 (M+H<sup>+</sup>); IR (neat): ν = 3408, 2957, 2926, 2856, 1459, 1360, 1323, 1294, 1227, 1168, 1137, 1111, 1031 cm<sup>-1</sup>; HRMS (ESI) calcd for C<sub>17</sub>H<sub>31</sub>NO [M<sup>+</sup>]: 265.2406, found: 265.2403.

**(11) (S)-5-(1-Pyrrolidinyl)-2,6-methyl-3-heptyn-2-ol ((S)-4ak) (fw-5-112)**



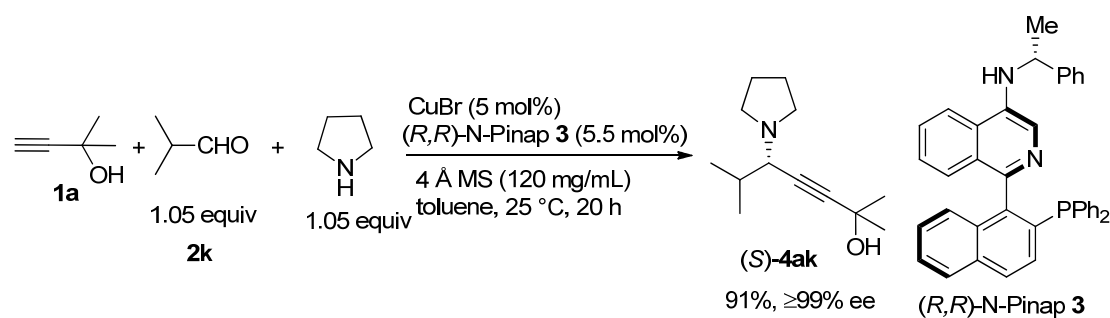

The reaction of CuBr (14.8 mg, 0.1 mmol, 98%), **(R,R)-N-Pinap 3** (63.7 mg, 0.11 mmol, 97%), 4 Å molecular sieves (600.7 mg), **1a** (168.5 mg, 2.0 mmol), **2k** (151.9 mg, 2.1 mmol), pyrrolidine (149.8 mg, 2.1 mmol) toluene (5 mL) afforded **(S)-4ak** (381.5 mg, 91%) (eluent: petroleum ether (30~60 °C)/ ethyl acetate/ Et<sub>3</sub>N = 200 mL/20 mL/0.13 mL to 250 mL/50 mL/0.13 mL, it should be noted that the column packed with silica gel was eluted with a mixture of petroleum ether (50 mL) and Et<sub>3</sub>N (0.5 mL) before loading the sample) as a liquid:  $\geq 99\%$  ee (HPLC conditions: Chiralcel AD-H column, hexane/*i*-PrOH = 100/1, 0.5 mL/min,  $\lambda$  = 214 nm,  $t_R$ (major) = 25.2 min);  $[\alpha]_D^{20}$  = -28.4 (c = 1.02, CHCl<sub>3</sub>); <sup>1</sup>H NMR (300 MHz, CDCl<sub>3</sub>)  $\delta$  = 3.01 (d,  $J_1$  = 7.8 Hz, 1 H, CHC $\equiv$ C), 2.68-2.48 (m, 4 H, from two CH<sub>2</sub>), 1.99 (bs, 1 H, OH), 1.87-1.71 (m, 5 H, from two CH<sub>2</sub> and CH), 1.53 (s, 6 H, OC(CH<sub>3</sub>)<sub>2</sub>), 1.01 (d,  $J$  = 6.9 Hz, 3 H, CH<sub>3</sub>), 0.98 (d,  $J$  = 6.6 Hz, 3 H, CH<sub>3</sub>); <sup>13</sup>C NMR (75 MHz, CDCl<sub>3</sub>)  $\delta$  = 90.3, 79.5, 64.9, 61.8, 50.2, 31.7, 31.4, 23.3, 20.1, 19.0; MS (ESI)  $m/z$  = 210 (M+H<sup>+</sup>); IR (neat):  $\nu$  = 3368, 2962, 2932, 2872, 2807, 1462, 1362, 1229, 1165, 1137, 1109, 1038 cm<sup>-1</sup>; HRMS (ESI) calcd for C<sub>13</sub>H<sub>23</sub>NO [M<sup>+</sup>]: 209.1780, found: 209.1781.

**(12) (S)-5-(1-Pyrrolidinyl)-2,7-methyl-3-octyn-2-ol ((S)-4al) (fw-5-116)**

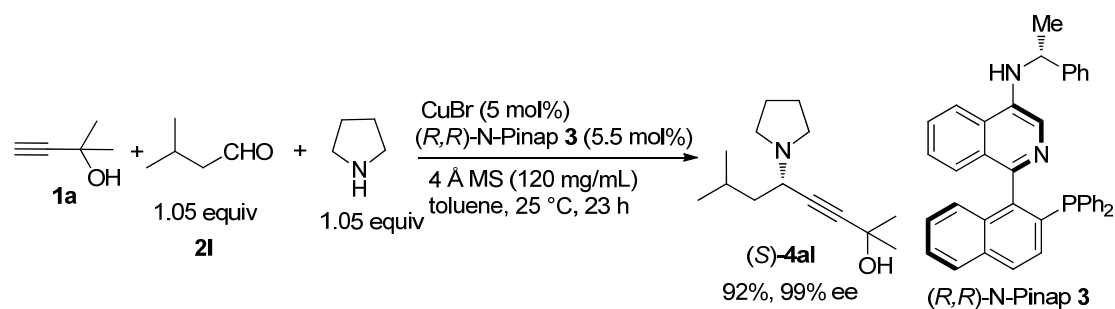

The reaction of CuBr (14.7 mg, 0.1 mmol, 98%), (R,R)-N-Pinap **3** (63.8 mg, 0.11 mmol, 97%), 4 Å molecular sieves (600.7 mg), **1a** (167.9 mg, 2.0 mmol), **2l** (181.0 mg, 2.1 mmol), pyrrolidine (150.0 mg, 2.1 mmol) and toluene (5 mL) afforded (S)-**4al** (410.2 mg, 92%) (eluent: petroleum ether (30~60 °C)/ ethyl acetate/ Et<sub>3</sub>N = 400 mL/40 mL /0.26 mL to 250 mL/50 mL/0.13 mL to 330 mL/110 mL/0.26 mL, it should be noted that the column packed with silica gel was eluted with a mixture of petroleum ether (50 mL) and Et<sub>3</sub>N (0.5 mL) before loading the sample) as a liquid:  $\geq 99\%$  ee (HPLC conditions: Chiralcel AD-H column, hexane/*i*-PrOH = 100/1, 0.5 mL/min,  $\lambda$  = 214 nm,  $t_R$ (major) = 13.4 min,  $t_R$ (minor) = 17.0 min);  $[\alpha]_D^{18}$  = -8.3 ( $c$  = 1.01, CHCl<sub>3</sub>); <sup>1</sup>H NMR (300 MHz, CDCl<sub>3</sub>)  $\delta$  = 3.56 (dd,  $J_1$  = 9.9 Hz,  $J_2$  = 5.7 Hz, 1 H, CHC $\equiv$ C), 2.72-2.50 (m, 4 H, from two CH<sub>2</sub>), 1.94 (bs, 1 H, OH), 1.87-1.70 (m, 5 H, from two CH<sub>2</sub> and CH), 1.62-1.39 (m, 8 H, from OC(CH<sub>3</sub>)<sub>2</sub> and CH<sub>2</sub>), 0.94 (d,  $J$  = 6.6 Hz, 3 H, CH<sub>3</sub>), 0.90 (d,  $J$  = 6.6 Hz, 3 H, CH<sub>3</sub>); <sup>13</sup>C NMR (75 MHz, CDCl<sub>3</sub>)  $\delta$  = 90.4, 79.6, 64.6, 52.3, 49.2, 43.6, 31.9, 25.2, 23.3, 21.6; MS (ESI)  $m/z$  = 224 (M+H<sup>+</sup>); IR (neat):  $\nu$  = 3359, 2956, 2928, 2873, 2811, 1463, 1386, 1370, 1358, 1315, 1293, 1280, 1223, 1159, 1134, 1107, 1090, 1035 cm<sup>-1</sup>; HRMS (ESI) calcd for C<sub>14</sub>H<sub>25</sub>NO [M<sup>+</sup>]: 223.1936, found: 223.1936.

**(13) (S)-5-(1-Pyrrolidinyl)-5-cyclohexyl-2-methyl-3-pentyn-2-ol ((S)-4am)**

(fw-5-108)

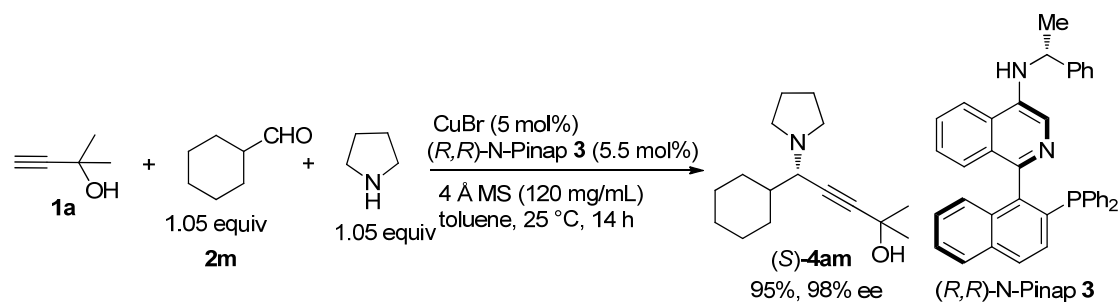

The reaction of **CuBr** (14.6 mg, 0.1 mmol, 98%), **(R,R)-N-Pinap 3** (64.1 mg, 0.11 mmol, 97%), 4 Å molecular sieves (600.7 mg), **1a** (167.3 mg, 2.0 mmol), **2m** (236.1 mg, 2.1 mmol), pyrrolidine (150.0 mg, 2.1 mmol) and toluene (5 mL) afforded **(S)-4am** (469.2 mg, 95%) (eluent: petroleum ether (30~60 °C)/ ethyl acetate/ Et<sub>3</sub>N = 200 mL/ 20 mL/ 0.13 mL to 250 mL/ 50 mL/ 0.13 mL, it should be noted that the column packed with silica gel was eluted with a mixture of petroleum ether (50 mL) and Et<sub>3</sub>N (0.5 mL) before loading the sample) as a liquid: 98% ee (HPLC conditions: Chiralcel OD-H column, hexane/*i*-PrOH = 200/1, 1.0 mL/min, λ = 214 nm, *t*<sub>R</sub>(major) = 12.7 min, *t*<sub>R</sub>(minor) = 11.1 min); [α]<sub>D</sub><sup>20</sup> = -17.6 (c = 1.01, CHCl<sub>3</sub>); <sup>1</sup>H NMR (300 MHz, CDCl<sub>3</sub>) δ = 3.11 (d, *J* = 8.1 Hz, 1 H, CHC≡C), 2.70-2.48 (m, 4 H, from two CH<sub>2</sub>), 2.02-1.80 (m, 3 H, from Cy and OH), 1.79-1.60 (m, 7 H, from Cy and pyrrolidine), 1.55-1.40 (m, 7 H, from Cy and OC(CH<sub>3</sub>)<sub>2</sub>), 1.32-0.95 (m, 5 H, from Cy); <sup>13</sup>C NMR (75 MHz, CDCl<sub>3</sub>) δ = 90.4, 79.6, 65.0, 60.5, 49.9, 40.9, 31.8, 30.5, 29.8, 26.5, 26.1, 26.0, 23.3; MS (ESI) *m/z* = 250 (M+H<sup>+</sup>); IR (neat): ν = 3393, 2977, 2950, 2925, 2881, 2868, 2852, 2824, 1449, 1361, 1315, 1260, 1221, 1172, 1164, 1115, 1078, 1054, 1022 cm<sup>-1</sup>; HRMS (ESI) calcd for C<sub>16</sub>H<sub>27</sub>NO [M<sup>+</sup>]: 249.2093, found: 249.2091.

**(14) (S)-5-(3,4-dihydroisoquinolin-2(1H)-yl)-5-cyclohexyl-2-methyl-3-pentyn-2-ol**

**((S)-4an) (fw-7-68)**

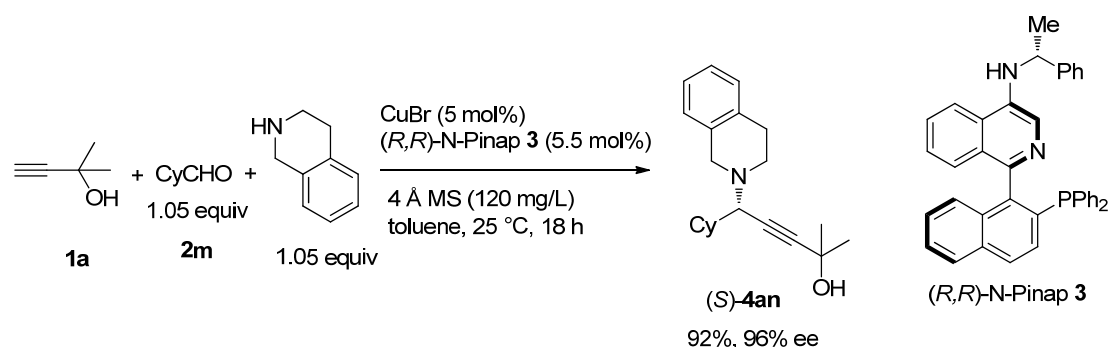

The reaction of **CuBr** (14.2 mg, 0.1 mmol, 98%), **(R,R)-N-Pinap 3** (63.5 mg, 0.11 mmol, 97%), 4 Å molecular sieves (600.0 mg), **1a** (168.4 mg, 2.0 mmol), **2m** (236.0 mg, 2.1 mmol), 1,2,3,4-tetrahydroisoquinoline (279.2 mg, 2.1 mmol), and toluene (5 mL) afforded **(S)-4an** (573.8 mg, 92%) (eluent: petroleum ether (30~60 °C)/ ethyl acetate = 20/1) as a liquid: 96% ee (HPLC conditions: Chiralcel OD-H column, hexane/*i*-PrOH = 95/5, 0.8 mL/min,  $\lambda$  = 214 nm,  $t_R$ (major) = 7.4 min,  $t_R$ (minor) = 8.2 min);  $[\alpha]_D^{30}$  = -24.2 ( $c$  = 1.80,  $\text{CHCl}_3$ );  $^1\text{H}$  NMR (300 MHz,  $\text{CDCl}_3$ )  $\delta$  = 7.15-7.01 (m, 4 H, Ar-H), 3.78 (d,  $J$  = 15.0 Hz, 1 H, one proton from  $\text{NCH}_2\text{Ar}$ ), 3.61 (d,  $J$  = 15.0 Hz, 1 H, one proton from  $\text{NCH}_2\text{Ar}$ ), 3.14 (d,  $J$  = 10.2 Hz, 1 H, CH from  $\text{CHC}\equiv\text{C}$ ), 2.92-2.81 (m, 3 H, from  $\text{NCH}_2\text{CH}_2$ ), 2.65-2.52 (m, 1 H, from  $\text{NCH}_2\text{CH}_2$ ), 2.13 (bs, 1 H, OH), 2.10-1.98 (m, 2 H, from Cy), 1.81-1.52 (m, 4 H, from Cy), 1.50 (s, 6 H,  $\text{OC}(\text{CH}_3)_2$ ), 1.35-0.80 (m, 5 H, from Cy);  $^{13}\text{C}$  NMR (75 MHz,  $\text{CDCl}_3$ )  $\delta$  = 135.5, 134.6, 128.5, 126.6, 125.8, 125.4, 91.3, 78.7, 65.2, 62.8, 52.1, 47.0, 39.5, 31.9, 31.1, 30.3, 29.5, 26.6, 26.1, 25.9; MS (ESI)  $m/z$  = 312 ( $\text{M}+\text{H}^+$ ); IR (neat):  $\nu$  = 3362, 2979, 2923, 2851, 1497, 1449, 1362, 1326, 1164, 1132  $\text{cm}^{-1}$ ; HRMS (ESI) calcd for  $\text{C}_{21}\text{H}_{30}\text{NO}$  [ $\text{M}+\text{H}^+$ ]: 312.2322, found: 312.2320.

## Comparison of different stereochemistry-dictating groups

### (1) (*S*)-4-(1-Pyrrolidinyl)-4-cyclohexyl-2-butyn-1-ol ((*S*)-**4bm**) (fw-5-150)

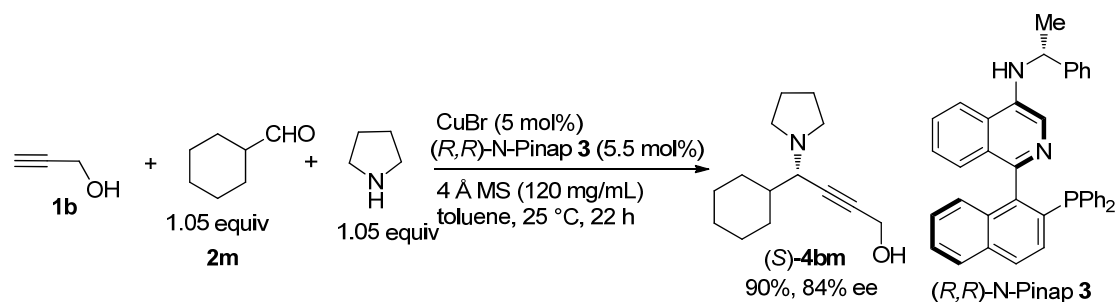

The reaction of CuBr (14.8 mg, 0.1 mmol, 98%), (*R,R*)-N-Pinap **3** (63.9 mg, 0.11 mmol, 97%), 4 Å molecular sieves (600.7 mg), **1b** (112.8 mg, 2.0 mmol), **2m** (234.9 mg, 2.1 mmol), pyrrolidine (149.8 mg, 2.1 mmol) and toluene (5 mL) afforded (*S*)-**4bm** (399.0 mg, 90%) (eluent: petroleum ether (30~60 °C)/ ethyl acetate/ Et<sub>3</sub>N = 400 mL/ 40 mL/ 0.26 mL to 250 mL/ 50 mL/ 0.13 mL, it should be noted that the column packed with silica gel was eluted with a mixture of petroleum ether (50 mL) and Et<sub>3</sub>N (0.5 mL) before loading the sample) as a liquid: 84% ee (HPLC conditions: Chiralcel AD-H column, hexane/*i*-PrOH = 90/10, 0.7 mL/min, λ = 214 nm, *t*<sub>R</sub>(major) = 4.8 min, *t*<sub>R</sub>(minor) = 4.1 min); [α]<sub>D</sub><sup>22</sup> = -16.1 (c = 1.02, CHCl<sub>3</sub>); <sup>1</sup>H NMR (300 MHz, CDCl<sub>3</sub>) δ = 4.31 (d, *J* = 1.5 Hz, 2 H, OCH<sub>2</sub>), 3.14 (d, *J* = 8.1 Hz, 1 H, CHC≡C), 2.70-2.48 (m, 4 H, from two CH<sub>2</sub>), 2.38 (bs, 1 H, OH), 1.99 (d, *J* = 12.6 Hz, 1 H, from Cy), 1.90-1.60 (m, 8 H, from Cy and pyrrolidine), 1.57-1.40 (m, 1 H, from Cy), 1.32-0.95 (m, 5 H, from Cy); <sup>13</sup>C NMR (75 MHz, CDCl<sub>3</sub>) δ = 84.1, 82.8, 60.9, 50.6, 50.1, 40.9, 30.5, 29.6, 26.5, 26.1, 26.0, 23.2; MS (ESI) *m/z* = 222 (M+H<sup>+</sup>); IR (neat): ν = 3142, 2970, 2918, 2881, 2844, 1449, 1355, 1317, 1275, 1262, 1224, 1186, 1145, 1117, 1078, 1065, 1050, 1026 cm<sup>-1</sup>; HRMS (ESI) calcd for C<sub>14</sub>H<sub>24</sub>NO [M+H<sup>+</sup>]:

222.1852, found: 222.1851.

**(2) (S)-1-(1-Cyclohexyl-3-(trimethylsilyl)prop-2-ynyl)pyrrolidine ((S)-4cm)**

**(fw-5-138)**

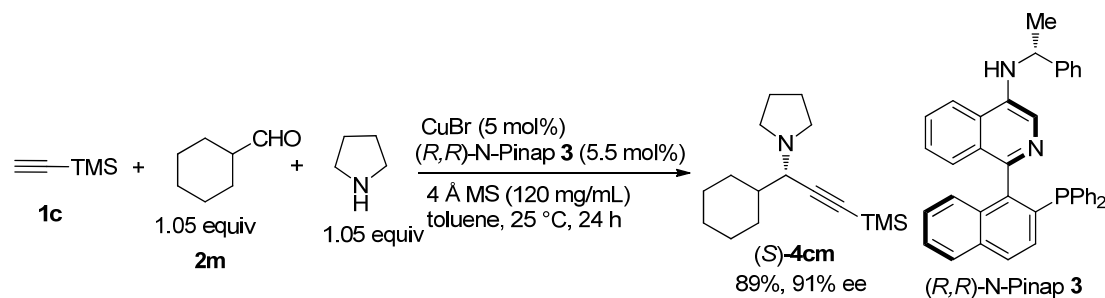

The reaction of CuBr (14.7 mg, 0.1 mmol, 98%), (R,R)-N-Pinap **3** (63.7 mg, 0.11 mmol, 97%), 4 Å molecular sieves (600.1 mg), **1c** (200.8 mg, 2.0 mmol, 98%), **2m** (236.1 mg, 2.1 mmol), pyrrolidine (149.9 mg, 2.1 mmol) and toluene (5 mL) afforded (S)-4cm (471.2 mg, 89%) (eluent: petroleum ether (30~60 °C)/ ethyl acetate/ Et<sub>3</sub>N = 300 mL/ 10 mL/ 0.13 mL, it should be noted that the column packed with silica gel was eluted with a mixture of petroleum ether (50 mL) and Et<sub>3</sub>N (0.5 mL) before loading the sample) as a liquid. The enantioselectivity was 91% ee as determined by HPLC analysis of the corresponding phenylacetylene derivative **6**.  $[\alpha]_D^{20} = -13.7$  (c = 1.02, CHCl<sub>3</sub>); <sup>1</sup>H NMR (300 MHz, CDCl<sub>3</sub>) δ = 3.10 (d, *J* = 8.4 Hz, 1 H, CHC≡C), 2.70-2.48 (m, 4 H, from two CH<sub>2</sub>), 1.99 (d, *J* = 12.6 Hz, 1 H, from Cy), 1.87 (d, *J* = 14.1 Hz, 1 H, from Cy), 1.80 -1.60 (m, 7 H, from Cy and pyrrolidine), 1.54-1.38 (m, 1 H, from Cy), 1.32-0.95 (m, 5 H, from Cy), 0.16 (s, 9 H, TMS); <sup>13</sup>C NMR (75 MHz, CDCl<sub>3</sub>) δ = 104.4, 89.4, 61.5, 49.9, 41.0, 30.6, 30.0, 26.7, 26.20, 26.16, 23.5, 0.3; MS (ESI) *m/z* = 264 (M+H<sup>+</sup>); IR (neat): ν = 2958, 2923, 2876, 2852, 2808, 2157, 1449, 1348, 1248, 1219, 1130, 1112 cm<sup>-1</sup>; HRMS (ESI) calcd for C<sub>16</sub>H<sub>30</sub>NSi [M+H<sup>+</sup>]:

264.2142, found: 264.2150.

### Synthesis of (S)-6 for determining the ee of (S)-4cm (fw-5-143, fw-5-147)

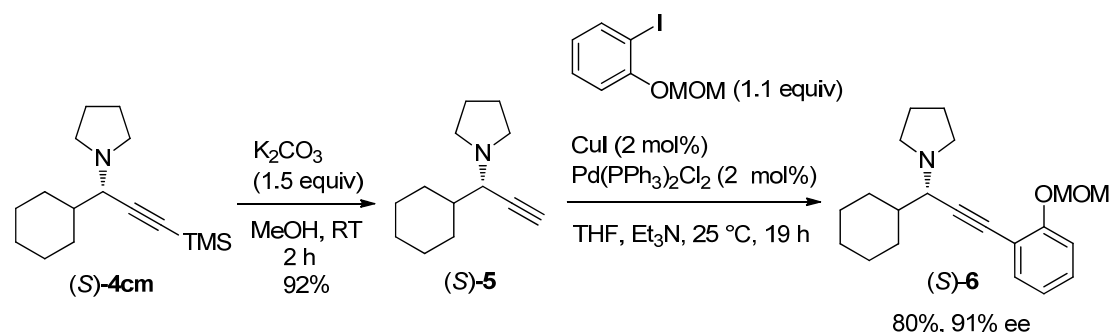

To a Schlenk tube were added (S)-4cm (442.3 mg, 1.7 mmol),  $\text{K}_2\text{CO}_3$  (346.0 mg, 2.5 mmol) and MeOH (5 mL). The reaction mixture was stirred at room temperature for 2 h. The crude reaction mixture was filtrated through a short pad of silica gel eluted with ether (30 mL). After evaporation, the residue was purified by chromatography on silica gel to afford (S)-5 (295.3 mg, 92%) (eluent: petroleum ether (30~60 °C)/ ethyl acetate/  $\text{Et}_3\text{N}$  = 300 mL/ 10 mL/ 0.13 mL, it should be noted that the column packed with silica gel was eluted with a mixture of petroleum ether (50 mL) and  $\text{Et}_3\text{N}$  (0.5 mL) before loading the sample) as a liquid:  $[\alpha]_{\text{D}}^{20} = -24.5$  ( $c = 1.02$ ,  $\text{CHCl}_3$ );  $^1\text{H}$  NMR (300 MHz,  $\text{CDCl}_3$ )  $\delta = 3.15$  (dd,  $J_1 = 8.7$  Hz,  $J_2 = 2.1$  Hz, 1 H,  $\text{CHC}\equiv\text{C}$ ), 2.70-2.48 (m, 4 H, from two  $\text{CH}_2$ ), 2.24 (d,  $J = 2.4$  Hz, 1 H,  $\text{C}\equiv\text{CH}$ ), 2.03 (d,  $J = 12.6$  Hz, 1 H, from Cy), 1.91 (d,  $J = 12.6$  Hz, 1 H, from Cy), 1.84-1.38 (m, 8 H, from Cy and pyrrolidine), 1.32-0.95 (m, 5 H, from Cy);  $^{13}\text{C}$  NMR (75 MHz,  $\text{CDCl}_3$ )  $\delta = 81.7, 73.0, 60.3, 49.6, 41.0, 30.4, 30.1, 26.6, 26.08, 26.05, 23.4$ .

To a flame-dried Schlenk tube were added  $\text{Pd}(\text{PPh}_3)_2\text{Cl}_2$  (15.1 mg, 0.02 mmol), (S)-5 (191.3 mg, 1.0 mmol), the iodobenzene-derivative (290.6 mg, 1.1 mmol),  $\text{Et}_3\text{N}$  (202.7 mg, 2.0 mmol), THF (2.0 mL) and CuI (3.7 mg, 0.02 mmol) sequentially under

Ar atmosphere. The Schlenk tube was then stirred at 25 °C until completion of the reaction as monitored by TLC (19 h). The crude reaction mixture was filtrated through a short pad of silica gel eluted with ether (30 mL). After evaporation, the residue was purified by chromatography on silica gel to afford (*S*)-**6** (262.0 mg, 80%) (eluent: petroleum ether (30~60 °C)/ ethyl acetate = 40:1, it should be noted that the column packed with silica gel was eluted with a mixture of petroleum ether (50 mL) and Et<sub>3</sub>N (0.5 mL) before loading the sample) as a liquid: 91% ee (HPLC conditions: Chiralcel OD-H column, hexane/*i*-PrOH = 400/1, 0.7 mL/min,  $\lambda$  = 220 nm,  $t_R$ (major) = 10.8 min,  $t_R$ (minor) = 9.8 min);  $[\alpha]_D^{22}$  = -15.9 (c = 1.05, CHCl<sub>3</sub>); 7.40 (dd,  $J_1$  = 7.5 Hz,  $J_2$  = 1.8 Hz, 1 H, Ar-H), 7.25-7.18 (m, 1 H, Ar-H), 7.06 (dd,  $J_1$  = 8.4 Hz,  $J_2$  = 0.6 Hz, 1 H, Ar-H), 6.94 (td,  $J_1$  = 7.5 Hz,  $J_2$  = 1.2 Hz, 1 H, Ar-H), 5.22 (s, 2 H, OCH<sub>2</sub>), 3.50 (s, 3 H, OCH<sub>3</sub>), 3.41 (d,  $J$  = 8.4 Hz, 1 H, CHC≡C), 2.81-2.60 (m, 4 H, from two CH<sub>2</sub>), 2.15 (d,  $J$  = 12.0 Hz, 1 H, from Cy), 1.97 (d,  $J$  = 13.2 Hz, 1 H, from Cy), 1.85-1.50 (m, 8 H, from Cy and pyrrolidine), 1.35-1.05 (m, 5 H, from Cy); <sup>13</sup>C NMR (75 MHz, CDCl<sub>3</sub>)  $\delta$  = 157.6, 133.4, 128.8, 121.6, 115.0, 114.2, 94.7, 92.2, 81.6, 61.4, 56.1, 49.8, 41.4, 30.6, 30.3, 26.7, 26.2, 23.6; MS (ESI)  $m/z$  = 328 (M+H<sup>+</sup>); IR (neat):  $\nu$  = 2921, 2849, 1597, 1574, 1489, 1449, 1402, 1348, 1308, 1276, 1252, 1226, 1196, 1152, 1112, 1079, 1043 cm<sup>-1</sup>; HRMS (ESI) calcd for C<sub>21</sub>H<sub>30</sub>NO<sub>2</sub> [M+H<sup>+</sup>]: 328.2271, found: 328.2272.

**(*S*)-1-(1-Cyclohexylprop-2-yn-1-yl)pyrrolidine (*S*-5) from 1a on 20 mmol scale (fw-5-61, fw-5-65)**



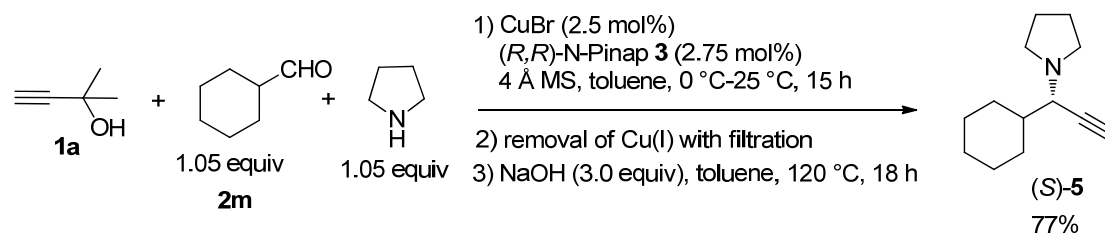

To a 100 mL flame-dried Schlenk tube were added CuBr (73.2 mg, 0.5 mmol, 98%) and (*R,R*)-N-Pinap **3** (317.8 mg, 0.55 mmol, 97%) inside a glove box. Toluene (10 mL) was then added under Ar atmosphere outside of the glove box. The Schlenk tube was then stirred 25 °C for 2 h. 4 Å molecular sieves (3.0001 g), **1a** (1.6860 g, 20 mmol)/toluene (10 mL), **2m** (2.4704 g, 22 mmol)/toluene (10 mL) were then added sequentially under Ar atmosphere. Pyrrolidine (1.8 mL, 22 mmol) was added dropwise within 30 min via syringe at 0 °C. The resulting mixture was allowed to warm to 25 °C with stirring. After 15 h, the reaction was complete as monitored by TLC. The crude reaction mixture was filtrated through a short pad of silica gel eluted with ether (100 mL). After evaporation, the crude product was used in the next step without further treatment.

To a 100 mL flame-dried, three-necked flask were added NaOH powder (2.4001 g, 60 mmol), the above crude product dissolved in toluene (10 mL) (transferred to the flask via a syringe) under Ar atmosphere, and toluene (40 mL). The flask was then equipped with a condenser and placed in a pre-heated oil bath at 120 °C with stirring. After 18 h, the reaction was complete as monitored by TLC. After cooling to room temperature, a saturated aqueous NH<sub>4</sub>Cl (20 mL) solution and ether (200 mL) were then added. The organic layer was separated, washed with H<sub>2</sub>O (20 mL × 3) and brine (10 mL × 3), and dried over anhydrous MgSO<sub>4</sub>. After filtration and evaporation, the

residue was purified by chromatography on silica gel to afford (*S*)-**5** (2.9038 g, 77%) (eluent: petroleum ether/ ethyl acetate/ Et<sub>3</sub>N = 400 mL/ 4 mL/ 0.26 mL, it should be noted that the column packed with silica gel was eluted with a mixture of petroleum ether (50 mL) and Et<sub>3</sub>N (0.5 mL) before loading the sample) as a liquid:  $[\alpha]_D^{20} = -25.4$  ( $c = 1.02$ , CHCl<sub>3</sub>); <sup>1</sup>H NMR (300 MHz, CDCl<sub>3</sub>)  $\delta = 3.15$  (dd,  $J_1 = 8.6$  Hz,  $J_2 = 2.0$  Hz, 1 H, CHC≡C), 2.70-2.48 (m, 4 H, from two CH<sub>2</sub>), 2.24 (d,  $J = 2.7$  Hz, 1 H, C≡CH), 2.03 (d,  $J = 12.6$  Hz, 1 H, from Cy), 1.91 (d,  $J = 12.6$  Hz, 1 H, from Cy), 1.84 -1.60 (m, 7 H, from Cy and pyrrolidine ), 1.56-1.38 (m, 1 H, from Cy), 1.32-0.95 (m, 5 H, from Cy); <sup>13</sup>C NMR (75 MHz, CDCl<sub>3</sub>)  $\delta = 81.7$ , 73.0, 60.3, 49.6, 41.0, 30.4, 30.1, 26.6, 26.08, 26.05, 23.4; MS (ESI)  $m/z = 192$  (M+H<sup>+</sup>); IR (neat):  $\nu = 3306$ , 2921, 2876, 2851, 2812, 1449, 1349, 1148, 1131, 1112, 1032 cm<sup>-1</sup>; HRMS (ESI) calcd for C<sub>13</sub>H<sub>22</sub>N [M+H<sup>+</sup>]: 192.1747, found: 192.1751.

## Synthetic applications of (*S*)-**5**

### (1) Preparation (*S*)-1-(1-Cyclohexyl-3-(2-(methoxymethoxy)phenyl)prop-2-yn-1-yl)pyrrolidin-e

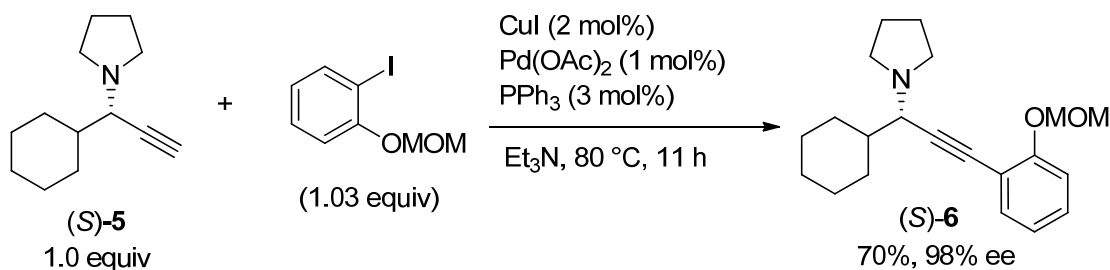

To a flame-dried Schlenk tube were added Pd(OAc)<sub>2</sub> (4.7 mg, 0.02 mmol), PPh<sub>3</sub> (15.6 mg, 0.06 mmol), the iodobenzene-derivative (541.3 mg, 2.05 mmol), (*S*)-**5**

S22

(382.0 mg, 2.0 mmol), Et<sub>3</sub>N (4 mL) and CuI (7.8 mg, 0.04 mmol) sequentially under Ar atmosphere. The Schlenk tube was then stirred at 80 °C until completion of the reaction as monitored by TLC (11 h). The crude reaction mixture was filtrated through a short pad of silica gel eluted with ether (30 mL). After evaporation, the residue was purified by chromatography on silica gel to afford (*S*)-**6** (460.9 mg, 70%) (eluent: petroleum ether/ ethyl acetate = 40:1, it should be noted that the column packed with silica gel was eluted with a mixture of petroleum ether (50 mL) and Et<sub>3</sub>N (0.5 mL) before loading the sample) as a liquid: 98% ee (HPLC conditions: Chiralcel OD-H column, hexane/*i*-PrOH = 400/1, 0.7 mL/min,  $\lambda$  = 220 nm, *t<sub>R</sub>*(major) = 11.8 min, *t<sub>R</sub>*(minor) = 10.6 min);  $[\alpha]_D^{22}$  = -17.5 (*c* = 1.02, CHCl<sub>3</sub>); 7.40 (dd, *J*<sub>1</sub> = 7.5 Hz, *J*<sub>2</sub> = 1.8 Hz, 1 H, Ar-H), 7.25-7.18 (m, 1 H, Ar-H), 7.06 (dd, *J*<sub>1</sub> = 8.3 Hz, *J*<sub>2</sub> = 0.5 Hz, 1 H, Ar-H), 6.94 (td, *J*<sub>1</sub> = 7.6 Hz, *J*<sub>2</sub> = 1.0 Hz, 1 H, Ar-H), 5.22 (s, 2 H, OCH<sub>2</sub>), 3.50 (s, 3 H, OCH<sub>3</sub>), 3.41 (d, *J* = 8.7 Hz, 1 H, CHC≡C), 2.81-2.60 (m, 4 H, from two CH<sub>2</sub>), 2.15 (d, *J* = 12.3 Hz, 1 H, from Cy), 1.97 (d, *J* = 13.2 Hz, 1 H, from Cy), 1.85-1.50 (m, 8 H, from Cy and pyrrolidine), 1.35-1.05 (m, 5 H, from Cy); <sup>13</sup>C NMR (75 MHz, CDCl<sub>3</sub>)  $\delta$  = 157.5, 133.4, 128.8, 121.6, 114.9, 114.2, 94.6, 92.2, 81.6, 61.3, 56.0, 49.8, 41.4, 30.6, 30.3, 26.7, 26.2, 23.5.

## (2) Preparation of (*S*)-4-(1-Pyrrolidinyl)-4-cyclohexyl-2-butyne-1-ol ((*S*)-**4bm**)

(fw-5-175)

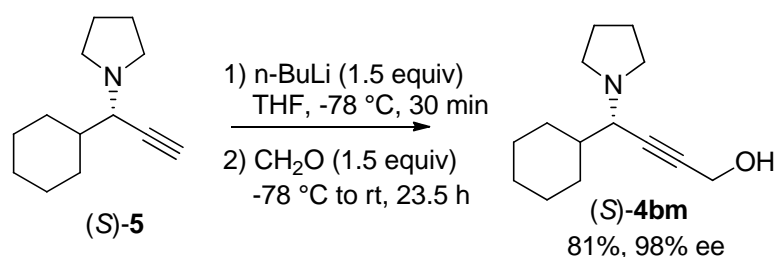

Propargylamine (*S*)-**5** (380.8 mg, 2.0 mmol) was dissolved in dry THF (10 mL) and cooled to -78 °C. *n*-BuLi (1.9 mL, 1.6 M in hexane, 3.0 mmol) was added dropwise via a syringe and the resulting mixture was stirred for 30 min at this temperature. Paraformaldehyde (90.9 mg, 3.0 mmol) was added in portions and then THF (15 mL) was added. Stirring was continued for 30 min at -78 °C and then at RT for 23.5 h. A sat. aqueous solution of NH<sub>4</sub>Cl (5 mL) and ether (50 mL) were added to the reaction mixture sequentially. The organic layer was separated, washed with H<sub>2</sub>O (5 mL × 3), and dried over anhydrous MgSO<sub>4</sub>. After filtration and evaporation, the residue was purified by chromatography on silica gel to afford (*S*)-**4bm** (355.6 mg, 81%) (eluent: petroleum ether (30~60 °C)/ ethyl acetate/ Et<sub>3</sub>N = 400 mL/40 mL/0.26 mL to 250 mL/50 mL/0.13 mL, it should be noted that the column packed with silica gel was eluted with a mixture of petroleum ether (50 mL) and Et<sub>3</sub>N (0.5 mL) before loading the sample) as a liquid: 98% ee (HPLC conditions: Chiralcel AD-H column, hexane/*i*-PrOH = 90/10, 1.0 mL/min,  $\lambda$  = 214 nm,  $t_R$ (major) = 4.9 min,  $t_R$ (minor) = 4.3 min);  $[\alpha]_D^{22}$  = -19.7 (c = 1.03, CHCl<sub>3</sub>); <sup>1</sup>H NMR (300 MHz, CDCl<sub>3</sub>)  $\delta$  = 4.31 (d,  $J$  = 1.2 Hz, 2 H, OCH<sub>2</sub>), 3.14 (d,  $J$  = 8.1 Hz, 1 H, CHC≡C), 2.70-2.48 (m, 5 H, from two CH<sub>2</sub> and OH), 1.99 (d,  $J$  = 12.6 Hz, 1 H, from Cy), 1.90 -1.41 (m, 9 H, from Cy and pyrrolidine ), 1.32-0.95 (m, 5 H, from Cy); <sup>13</sup>C NMR (75 MHz, CDCl<sub>3</sub>)  $\delta$  = 84.0, 83.2, 60.9, 50.8, 50.1, 40.9, 30.5, 29.7, 26.5, 26.13, 26.06, 23.3.

**(3) Preparation of (*S*)-Methyl 4-(1-pyrrolidinyl)-4-cyclohexyl-2-butynoate ((*S*)-**7**)**  
**(fw-5-71)**

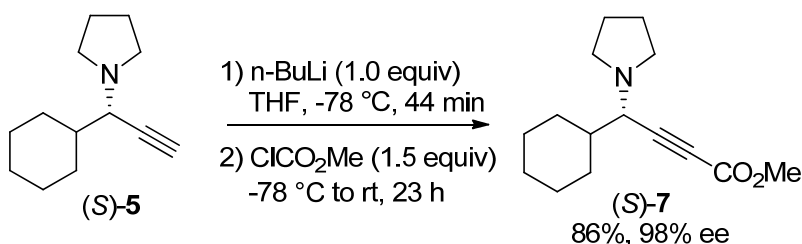

Propargylamine (S)-5 (766.4 mg, 4.0 mmol) was dissolved in dry THF (20 mL) and cooled to -78 °C. *n*-BuLi (2.5 mL, 1.6 M in hexane, 4.0 mmol) was added dropwise slowly via a syringe and the resulting mixture was stirred for 44 min at this temperature. Methyl chloroformate (0.945 mL, *d* = 1.223 g/mL, 1.134 g, 12.0 mmol) was added dropwise to the reaction mixture via a syringe pump over 2 h. The mixture was allowed to warm up to rt for 23 h. A saturated aqueous solution NH<sub>4</sub>Cl (5 mL) and ether (50 mL) were added to the reaction mixture. The organic layer was separated, washed with H<sub>2</sub>O (5 mL x 3), and dried over anhydrous MgSO<sub>4</sub>. After filtration and evaporation, the residue was purified by chromatography on silica gel to afford (S)-7 (863.1 mg, 86%) (eluent: petroleum ether/ ethyl acetate = 50:1) as a liquid: 98% ee (HPLC conditions: Chiralcel AD-H column, hexane/*i*-PrOH = 100/0, 1.0 mL/min,  $\lambda$  = 214 nm,  $t_R$ (major) = 6.46 min,  $t_R$ (minor) = 6.03 min);  $[\alpha]_D^{24}$  = -19.3 (*c* = 1.02, CHCl<sub>3</sub>); <sup>1</sup>H NMR (300 MHz, CDCl<sub>3</sub>)  $\delta$  = 3.77 (s, 3 H, COOCH<sub>3</sub>) 3.32 (d, *J* = 9.3 Hz, 1 H, CHC≡C), 2.70-2.51 (m, 4 H, from two CH<sub>2</sub>), 2.06-1.90 (m, 2 H, from Cy), 1.84-1.46 (m, 8 H, from Cy and pyrrolidine), 1.34-0.88 (m, 5 H, from Cy); <sup>13</sup>C NMR (75 MHz, CDCl<sub>3</sub>)  $\delta$  = 153.9, 87.1, 77.6, 60.1, 52.4, 49.4, 40.6, 30.4, 30.2, 26.4, 25.8, 23.3; MS (ESI) *m/z* = 250 (M+H<sup>+</sup>); IR (neat):  $\nu$  = 2925, 2852, 2810, 2220, 1714, 1449, 1434, 1349, 1236, 1134, 1111, 1083, 1045 cm<sup>-1</sup>; HRMS (ESI) calcd for C<sub>15</sub>H<sub>24</sub>NO<sub>2</sub> [M+H<sup>+</sup>]: 250.1802, found: 250.1807.

**Reference:**

1. J. Ye, S. Li, B. Chen, W. Fan, J. Kuang, J. Liu, Y. Liu, B. Miao, B. Wan, Y. Wang, X. Xie, Q. Yu, W. Yuan and S. Ma, *Org. Lett.*, 2012, **14**, 1346.

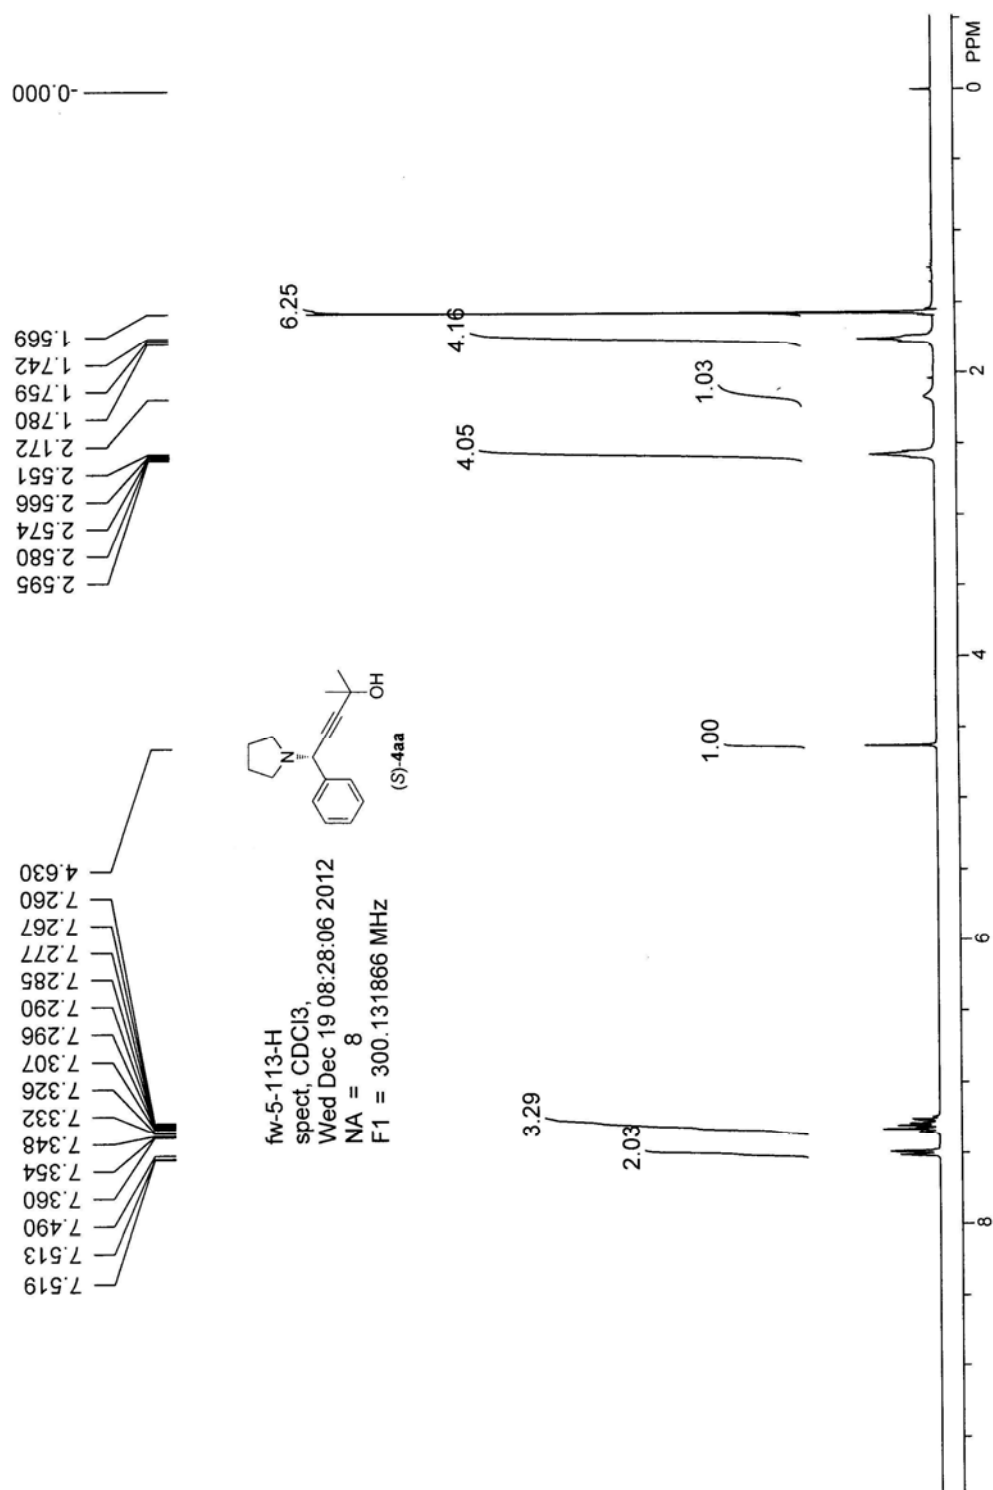

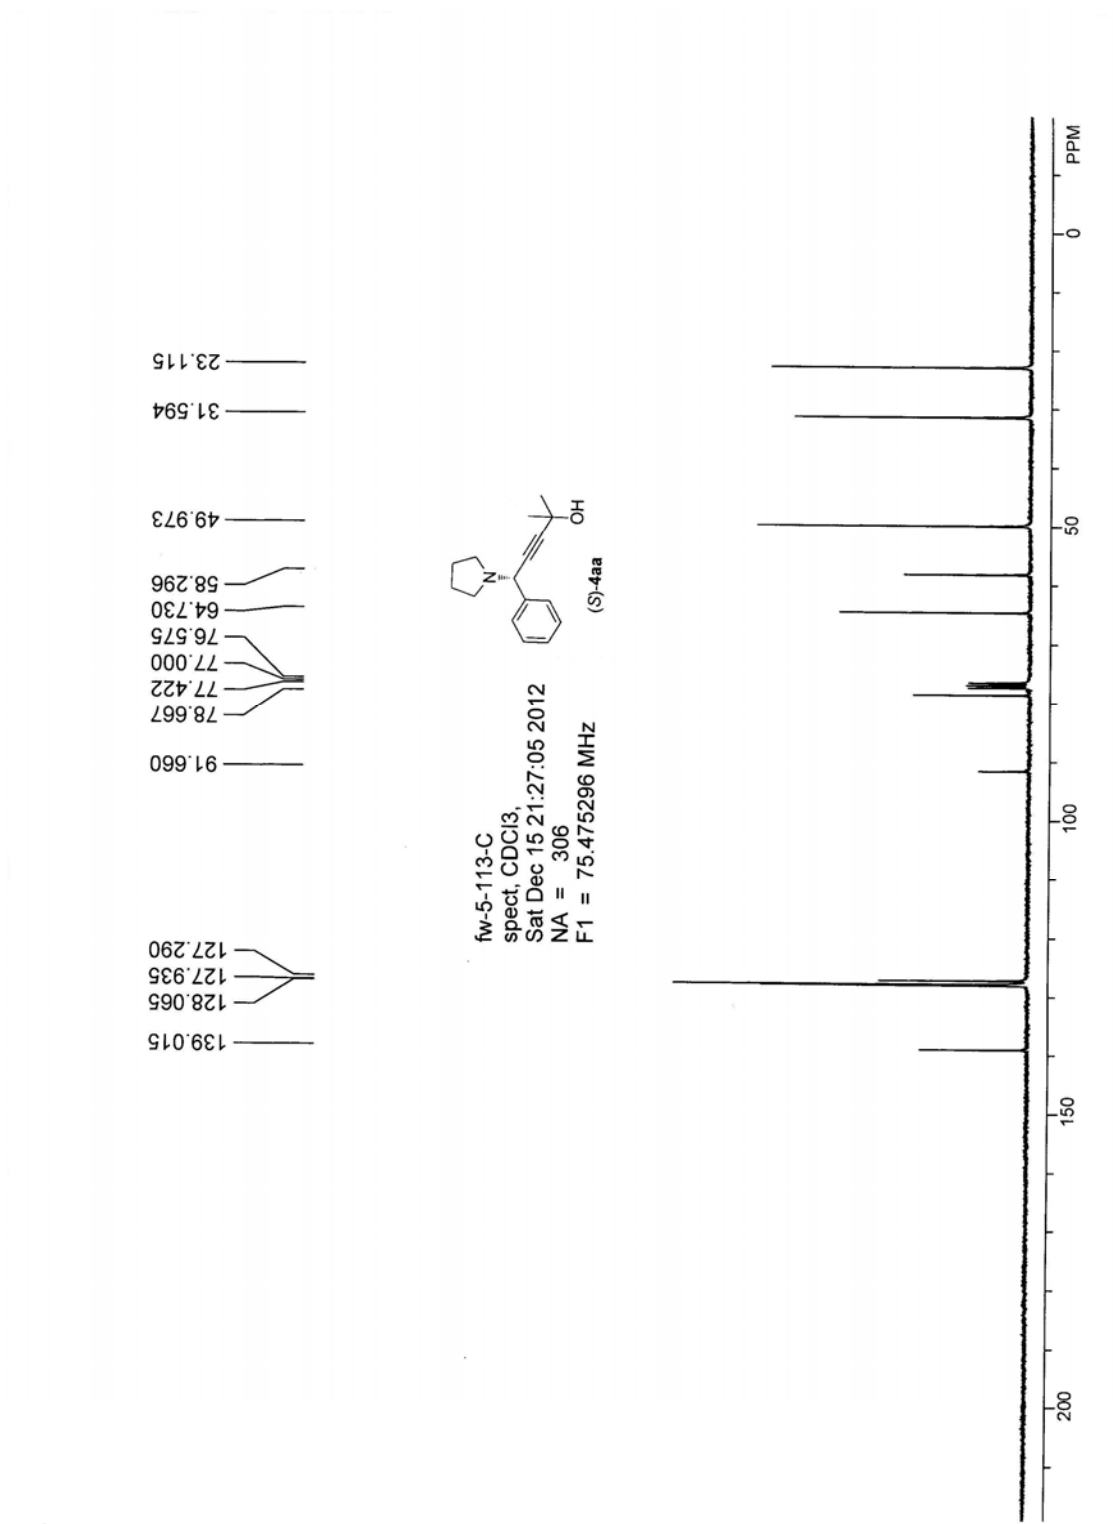



fw-5-109-od-h-100-1-1-214

实验时间: 2012-12-20, 13:15:17  
谱图文件: D:\zhuguangjiong\fw\20121220\fw-5-109-od-h-100-1-1-214..org  
报告时间: 2012-12-20, 15:29:22

实验内容简介:  
od-h 100\*1  
1ml/min 214nm

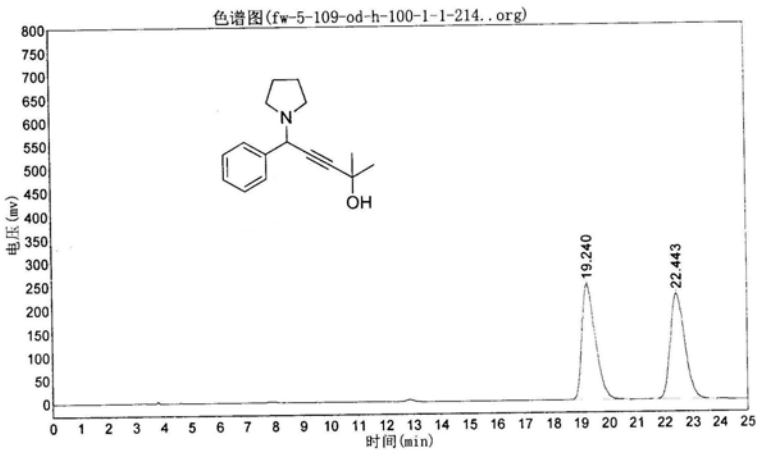

分析结果表

| 峰号 | 峰名 | 保留时间   | 峰高         | 峰面积          | 含量       |
|----|----|--------|------------|--------------|----------|
| 1  |    | 19.240 | 246885.516 | 8246780.500  | 49.9404  |
| 2  |    | 22.443 | 225619.516 | 8266448.500  | 50.0596  |
| 总计 |    |        | 472505.031 | 16513229.000 | 100.0000 |

fw-5-113-od-h-100-1-1-214

实验时间: 2012-12-20, 13:44:45      报告时间: 2012-12-20, 15:25:36  
谱图文件: D:\zhuguangjiong\fw\20121220\fw-5-113-od-h-100-1-1-214. .org

实验内容简介:  
od-h 100+1  
1ml/min 214nm

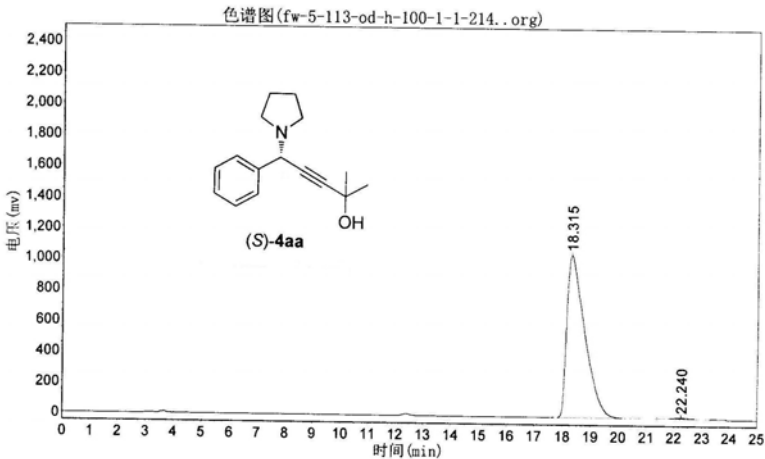

| 分析结果表 |    |        |             |              |          |
|-------|----|--------|-------------|--------------|----------|
| 峰号    | 峰名 | 保留时间   | 峰高          | 峰面积          | 含量       |
| 1     |    | 18.315 | 1052768.375 | 47079600.000 | 99.2187  |
| 2     |    | 22.240 | 8248.217    | 370722.938   | 0.7813   |
| 总计    |    |        | 1061016.592 | 47450322.938 | 100.0000 |

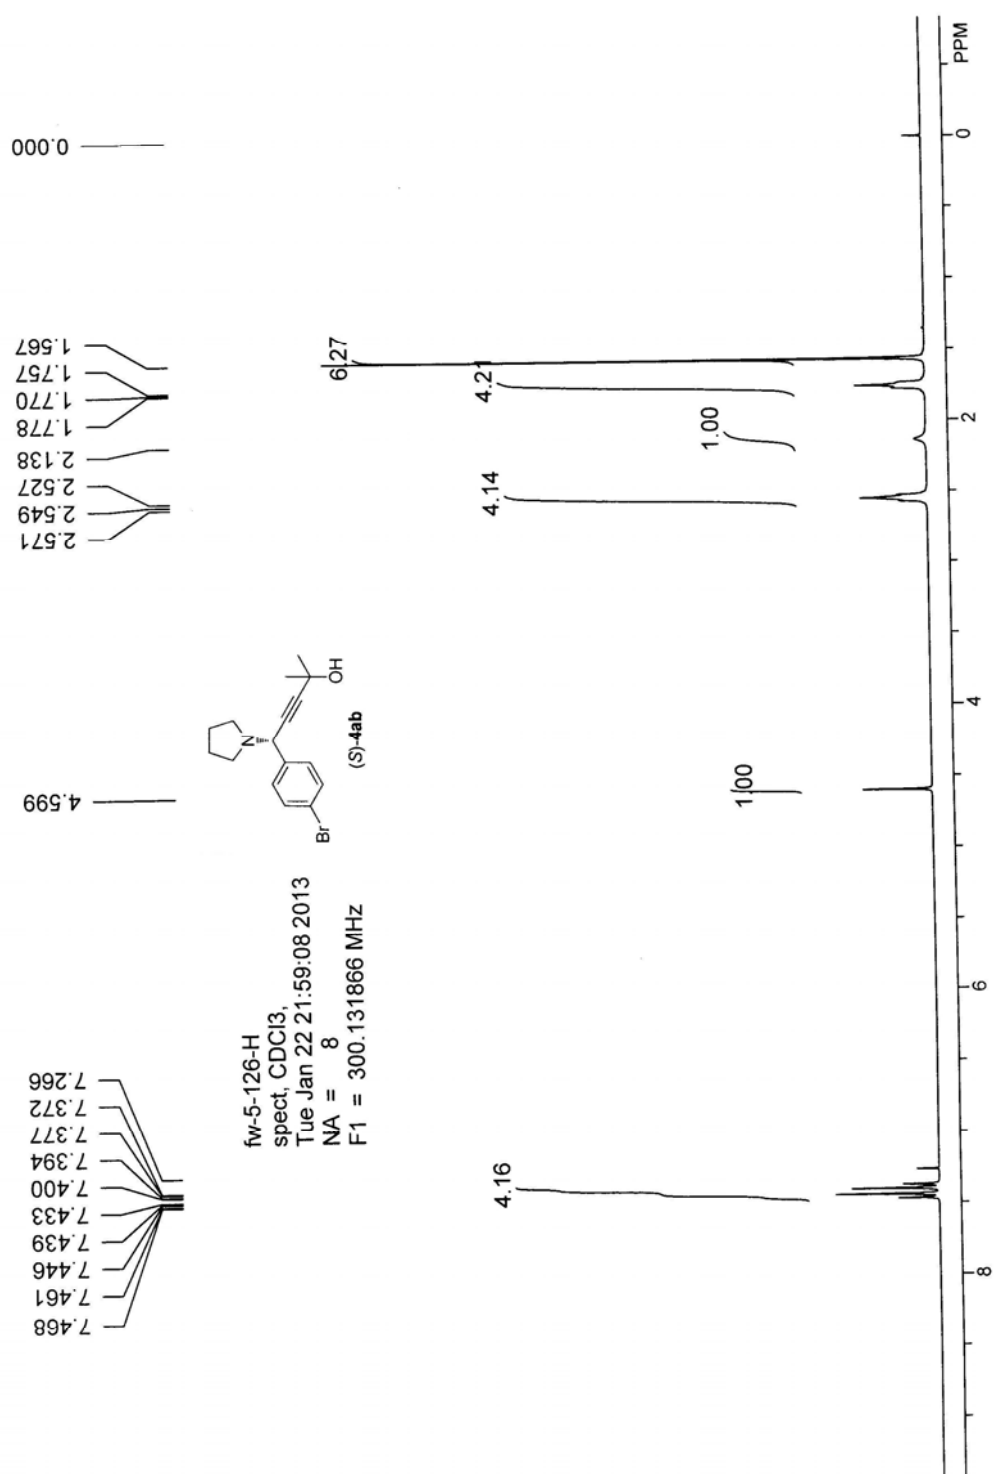

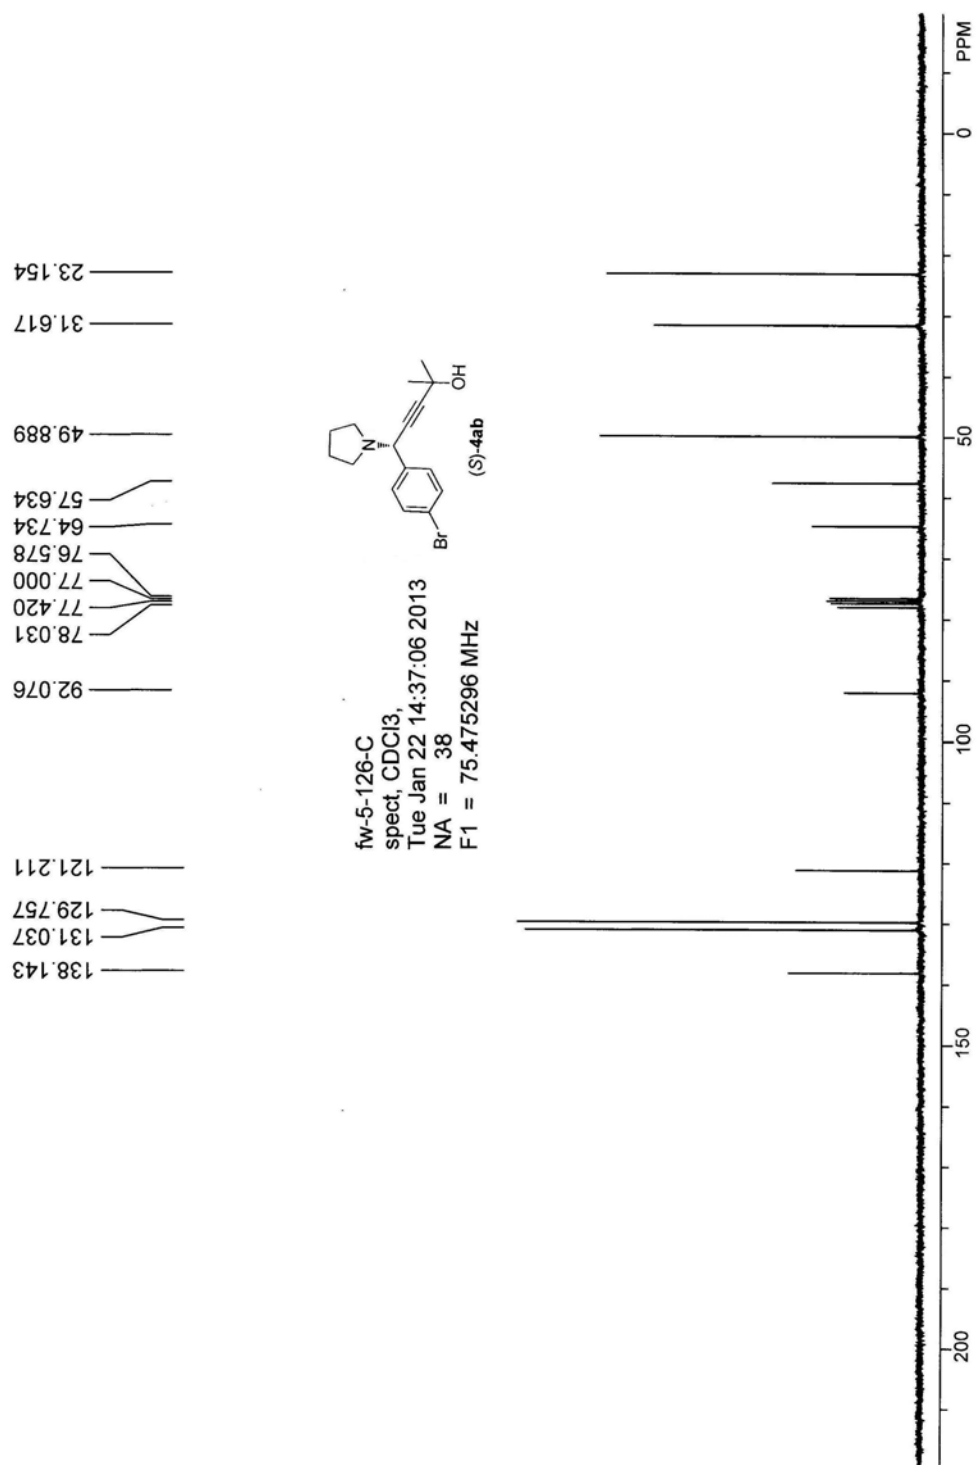

fw-5-124-ad-h-90-10-1-214

实验时间: 2012-12-31, 17:03:00      报告时间: 2012-12-31, 17:13:11  
谱图文件: D:\zhuguangjiong\fw\20121231\fw-5-124-ad-h-90-10-1-214..org

实验内容简介:  
ad-h 90/10  
1ml/min 214nm

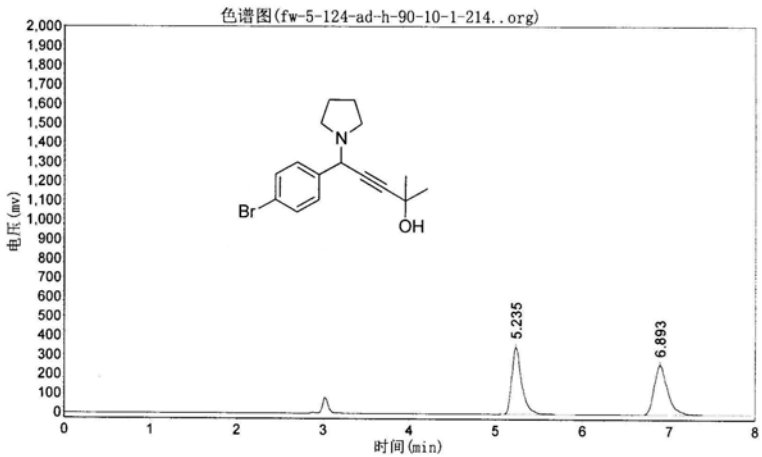

| 分析结果表 |    |       |            |             |          |
|-------|----|-------|------------|-------------|----------|
| 峰号    | 峰名 | 保留时间  | 峰高         | 峰面积         | 含量       |
| 1     |    | 5.235 | 344780.313 | 2766387.250 | 49.8808  |
| 2     |    | 6.893 | 253020.047 | 2779612.750 | 50.1192  |
| 总计    |    |       | 597800.359 | 5546000.000 | 100.0000 |

fw-5-126-ad-h-90-10-1-214

实验时间: 2012-12-31, 16:53:05      报告时间: 2012-12-31, 17:12:16  
谱图文件: D:\zhuguangjiong\fw\20121231\fw-5-126-ad-h-90-10-1-214.org

实验内容简介:  
ad-h 90/10  
1ml/min 214nm

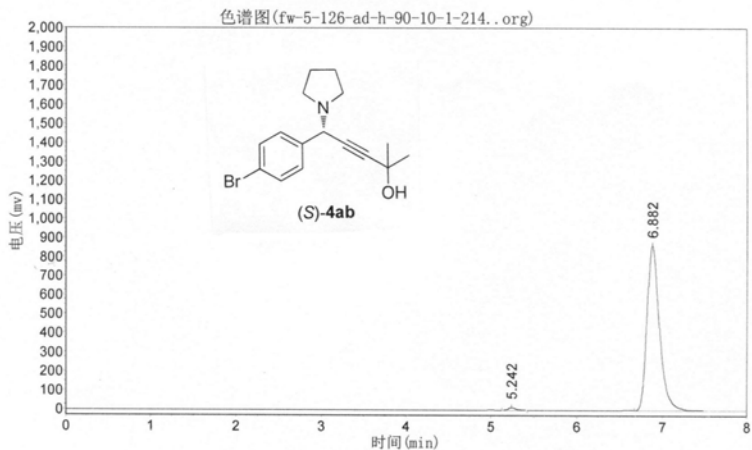

| 分析结果表 |    |       |            |             |          |
|-------|----|-------|------------|-------------|----------|
| 峰号    | 峰名 | 保留时间  | 峰高         | 峰面积         | 含量       |
| 1     |    | 5.242 | 11597.934  | 87314.695   | 0.9724   |
| 2     |    | 6.882 | 861971.125 | 8892046.000 | 99.0276  |
| 总计    |    |       | 873569.059 | 8979360.695 | 100.0000 |

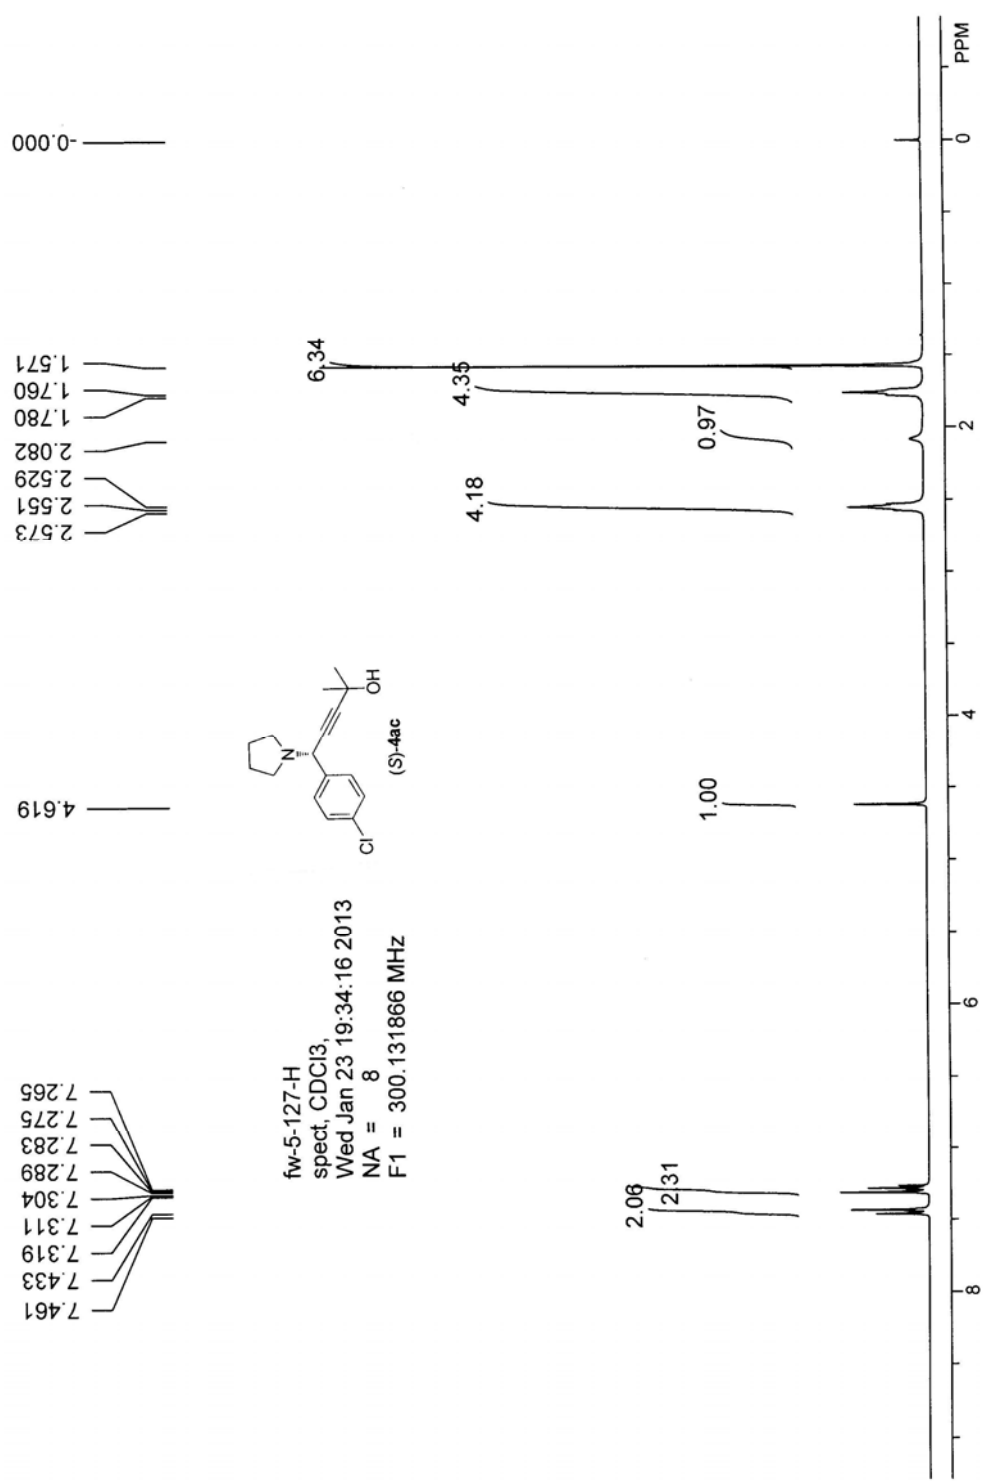

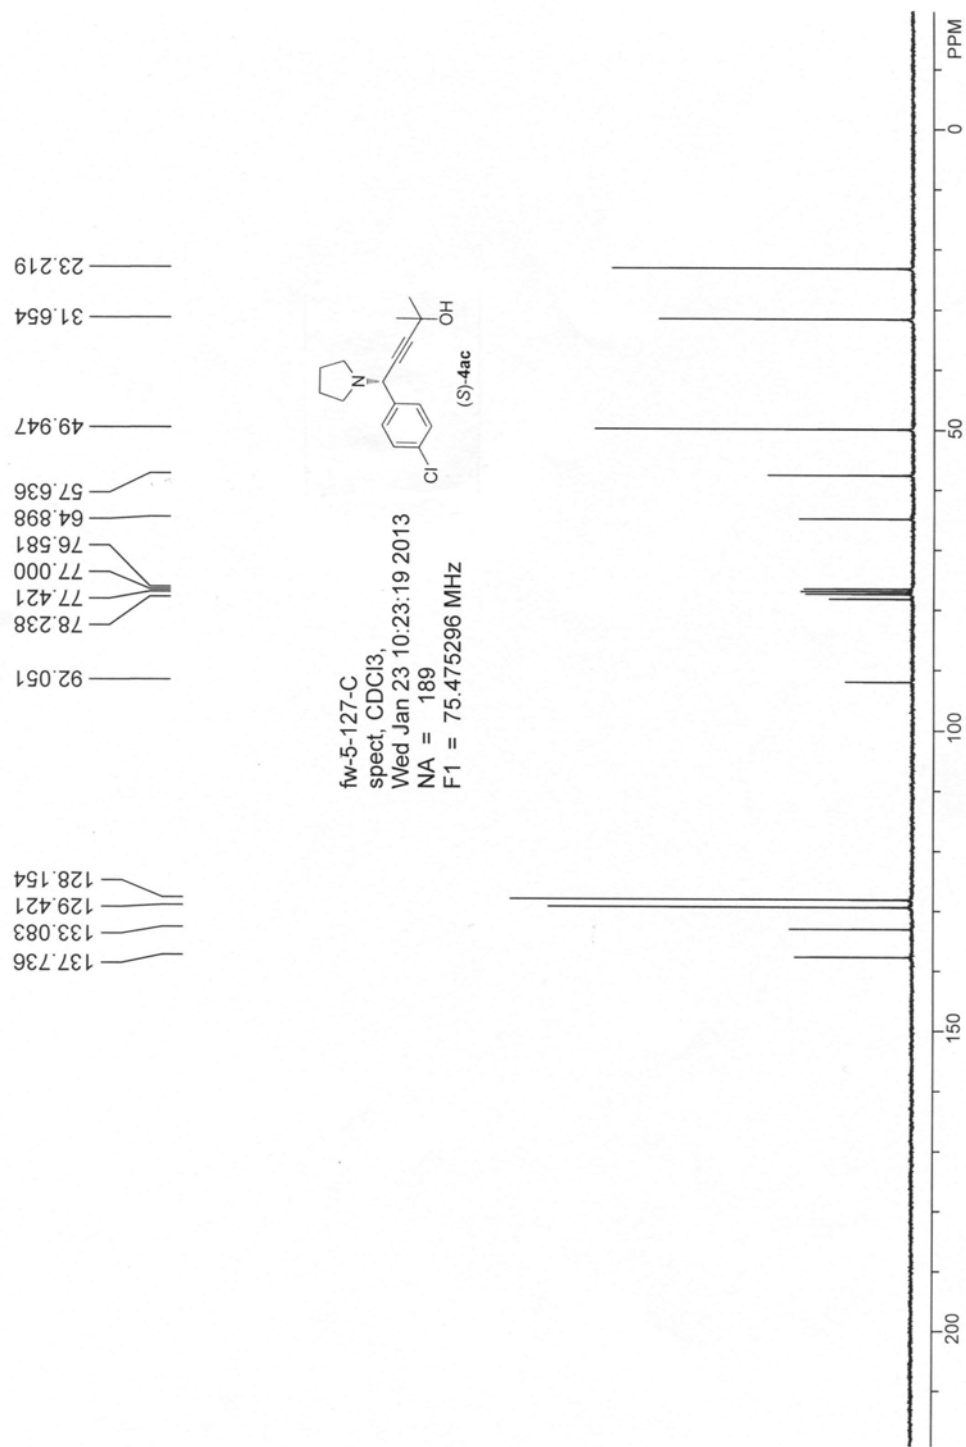



fw-5-125-ad-h-90-10-1-214

实验时间: 2012-12-31, 16:19:10      报告时间: 2012-12-31, 16:29:39  
谱图文件: D:\zhuguangjiong\fw\20121231\fw-5-125-ad-h-90-10-1-214.org

实验内容简介:  
ad-h 90/10  
1ml/min 214nm

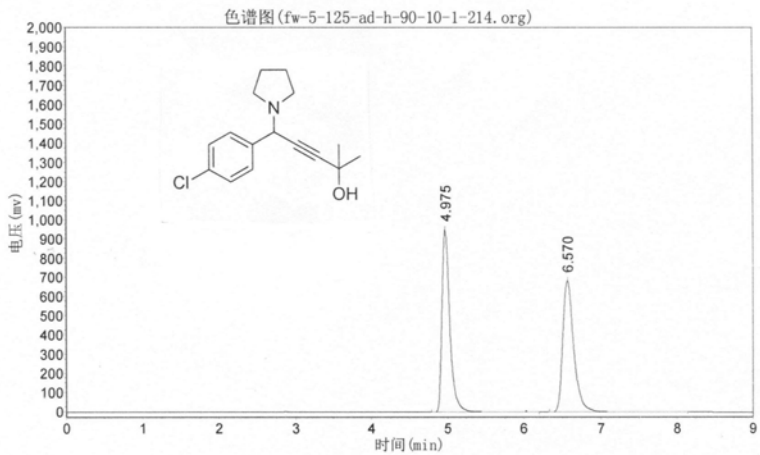

分析结果表

| 峰号 | 峰名 | 保留时间  | 峰高          | 峰面积          | 含量       |
|----|----|-------|-------------|--------------|----------|
| 1  |    | 4.975 | 949296.938  | 6742975.500  | 49.8397  |
| 2  |    | 6.570 | 681683.750  | 6786356.500  | 50.1603  |
| 总计 |    |       | 1630980.688 | 13529332.000 | 100.0000 |

fw-5-127-ad-h-90-10-1-214

实验时间: 2012-12-31, 16:00:46      报告时间: 2012-12-31, 16:27:43  
谱图文件: D:\zhuguangjiong\fw\20121231\fw-5-127-ad-h-90-10-1-214. org

实验内容简介:  
ad-h 90/10  
1ml/min 214nm

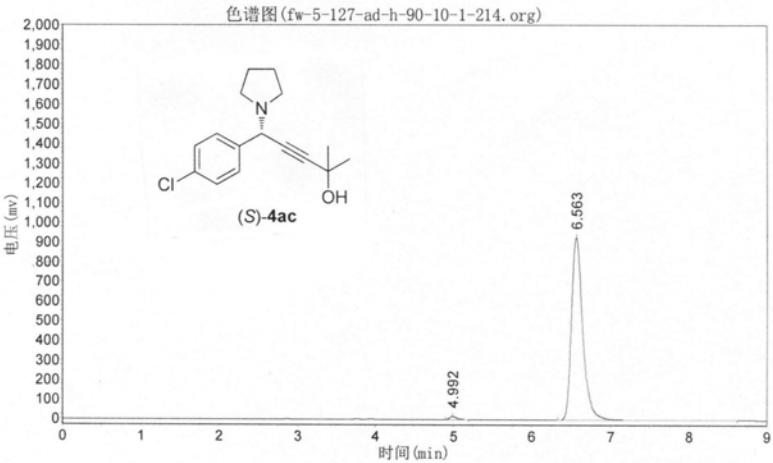

分析结果表

| 峰号 | 峰名 | 保留时间  | 峰高         | 峰面积         | 含量       |
|----|----|-------|------------|-------------|----------|
| 1  |    | 4.992 | 13555.736  | 97979.805   | 1.0459   |
| 2  |    | 6.563 | 927354.563 | 9269947.000 | 98.9541  |
| 总计 |    |       | 940910.299 | 9367926.805 | 100.0000 |

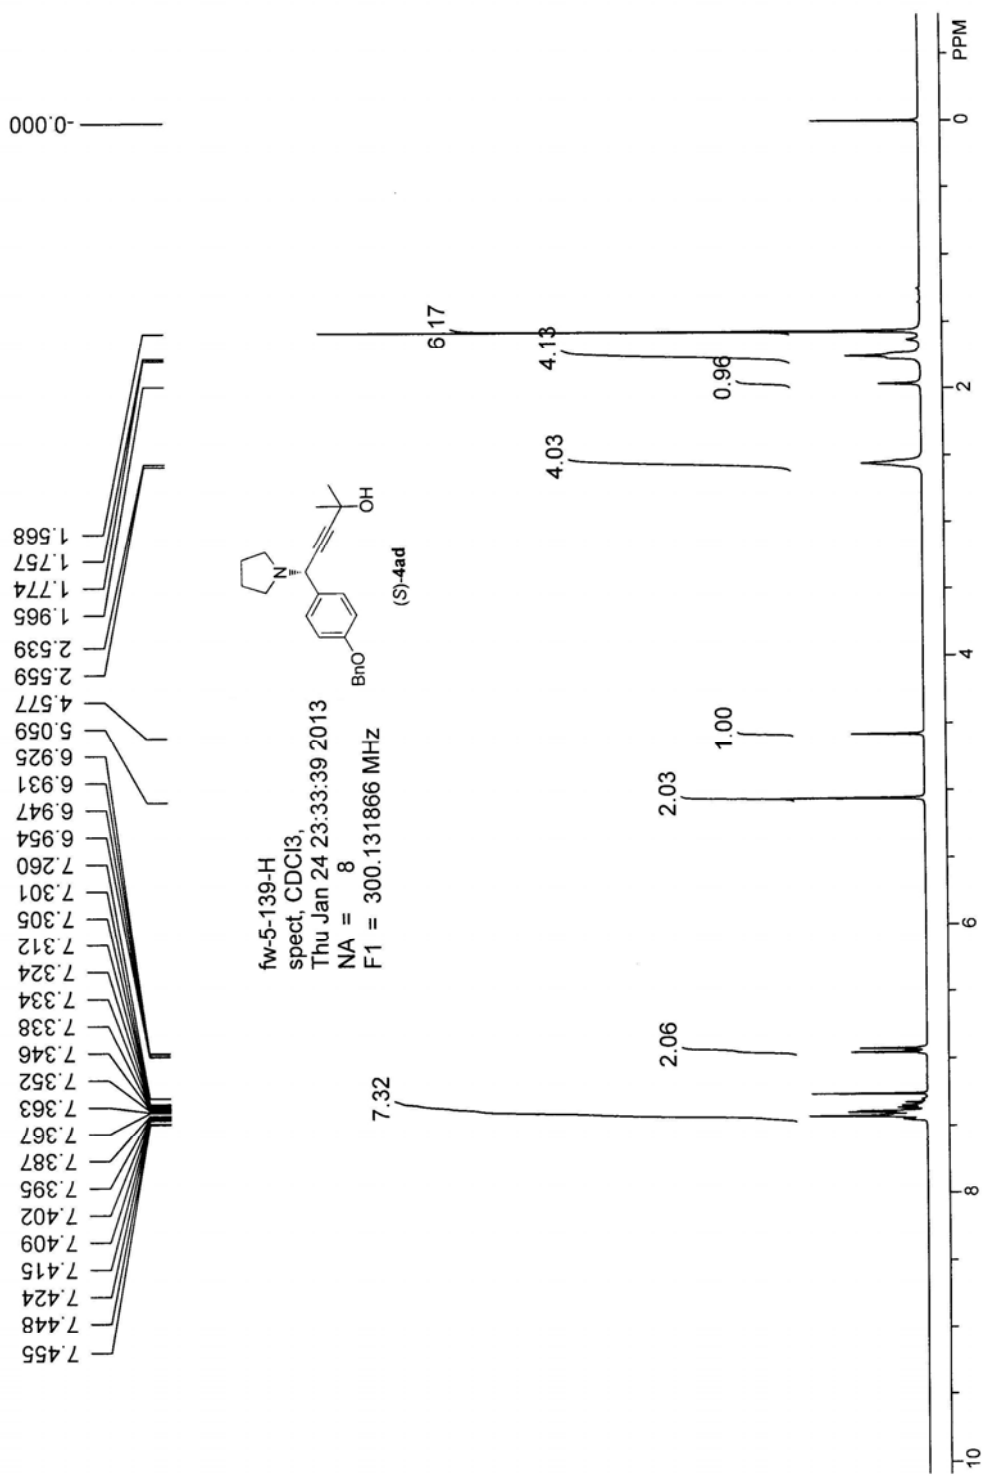

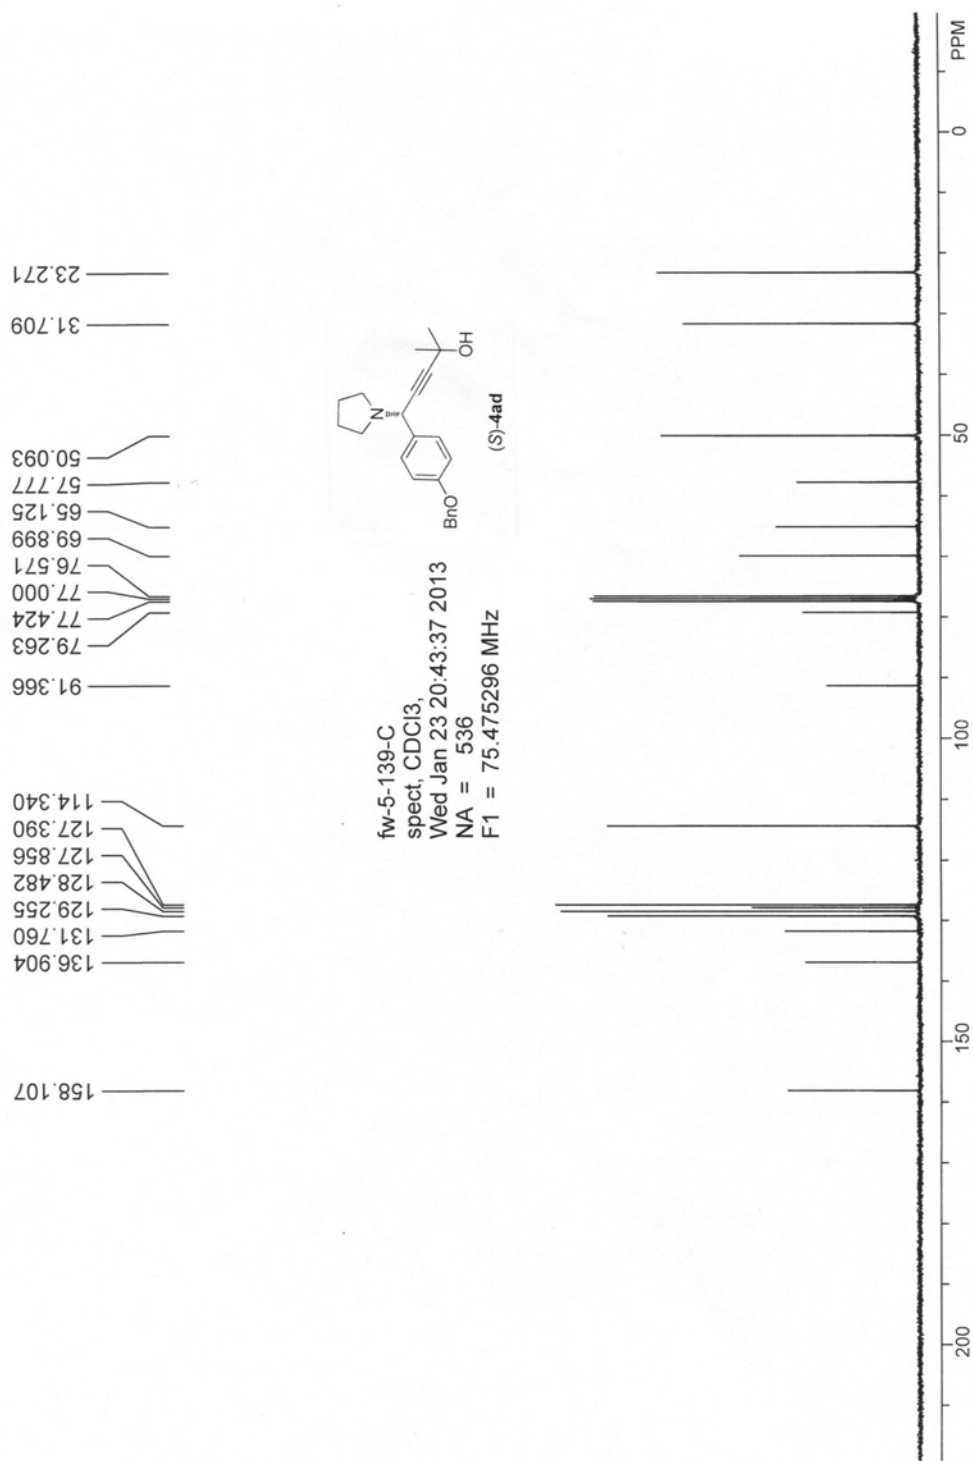

fw-5-129-ad-h-90-10-1-214

实验时间: 2013-01-10, 14:27:16      报告时间: 2013-01-10, 14:56:24  
谱图文件: D:\zhuguangji\fw\20130110\fw-5-129-ad-h-90-10-1-214. .org

实验内容简介:  
ad-h 90/10  
1ml/min 214nm

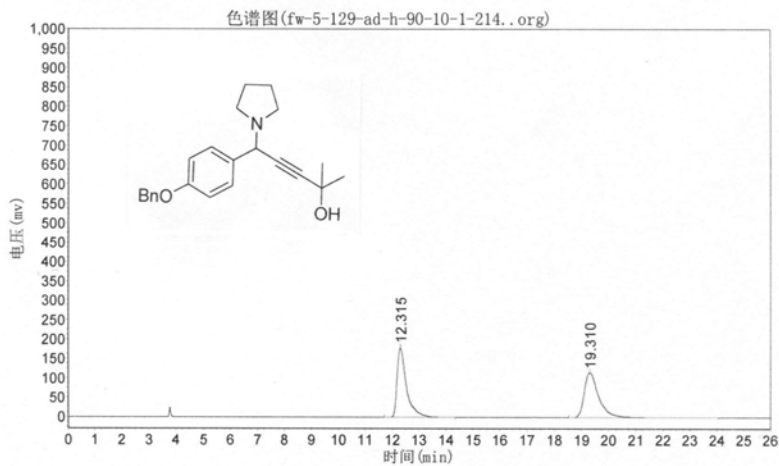

分析结果表

| 峰号 | 峰名 | 保留时间   | 峰高         | 峰面积         | 含量       |
|----|----|--------|------------|-------------|----------|
| 1  |    | 12.315 | 178816.719 | 4360331.500 | 49.8094  |
| 2  |    | 19.310 | 116092.883 | 4393710.000 | 50.1906  |
| 总计 |    |        | 294909.602 | 8754041.500 | 100.0000 |

fw-5-139-ad-h-90-10-1-214

实验时间: 2013-01-10, 11:28:38      报告时间: 2013-01-10, 14:40:54  
谱图文件: D:\zhuguangjiong\fw\20130110\fw-5-139-ad-h-90-10-1-214..org

实验内容简介:  
ad-h 90/10  
1ml/min 214nm

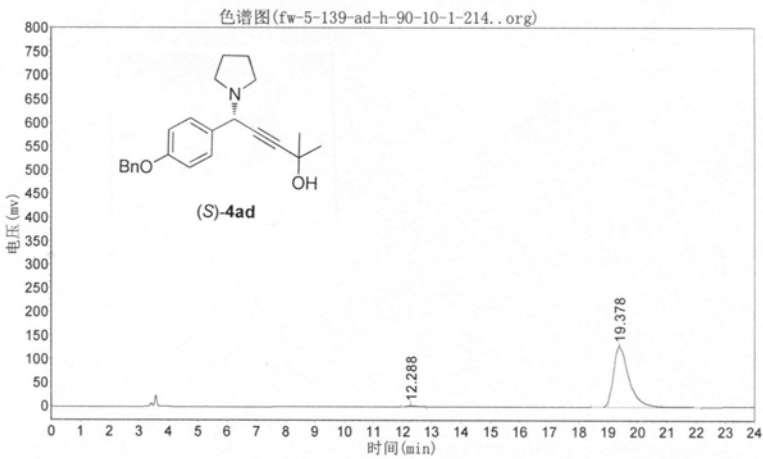

分析结果表

| 峰号 | 峰名 | 保留时间   | 峰高         | 峰面积         | 含量       |
|----|----|--------|------------|-------------|----------|
| 1  |    | 12.288 | 2049.157   | 48819.699   | 1.0292   |
| 2  |    | 19.378 | 127548.758 | 4694580.000 | 98.9708  |
| 总计 |    |        | 129597.915 | 4743399.699 | 100.0000 |

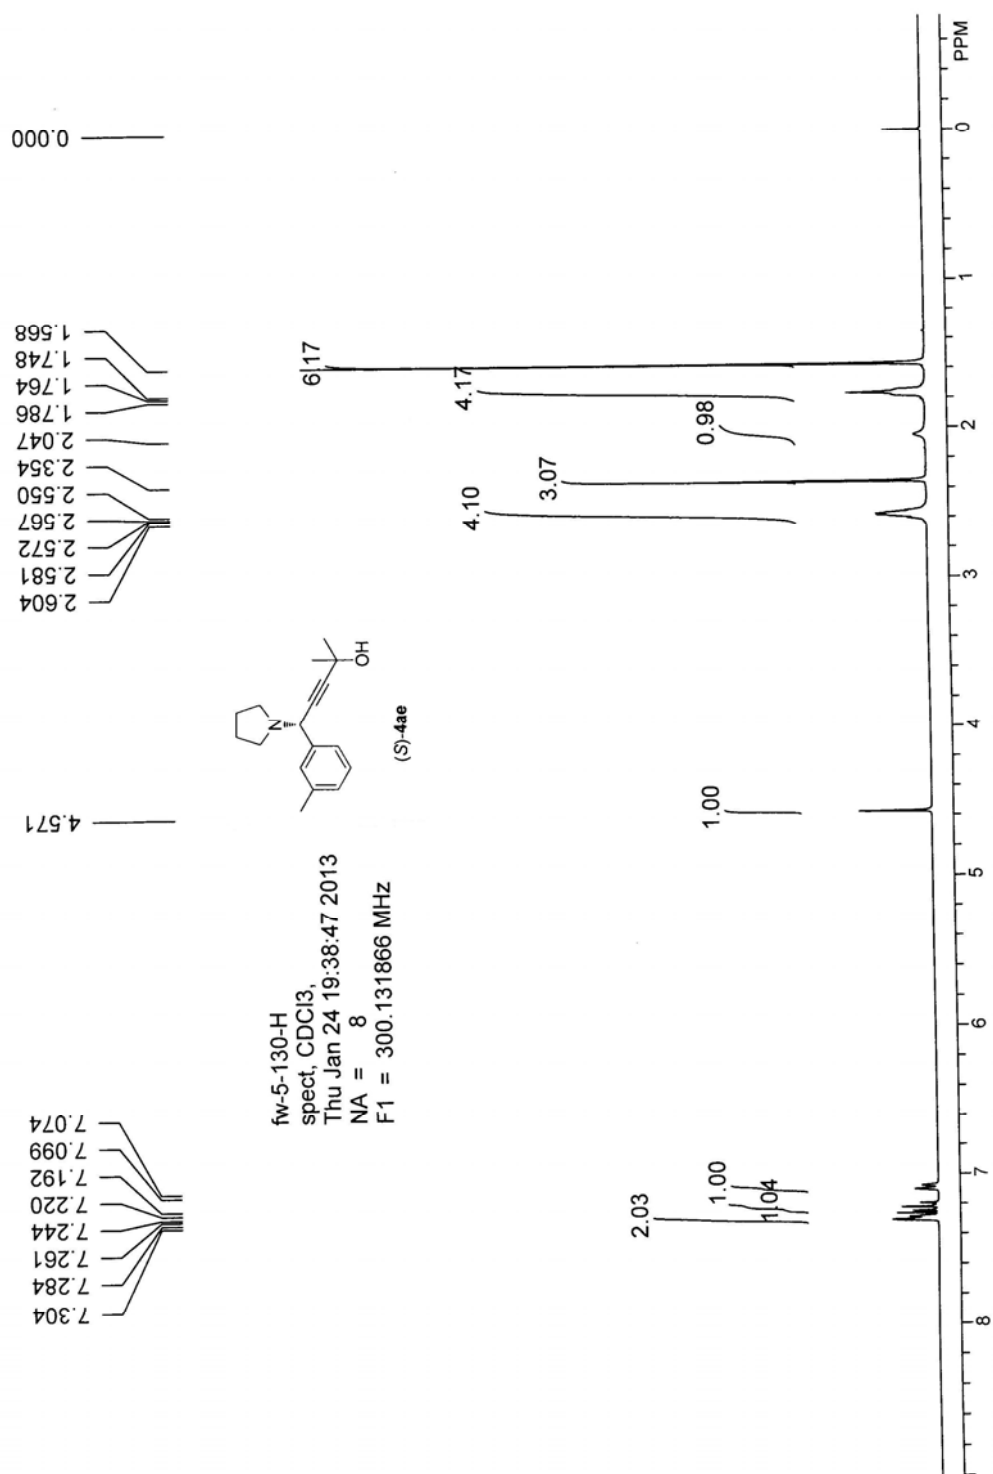

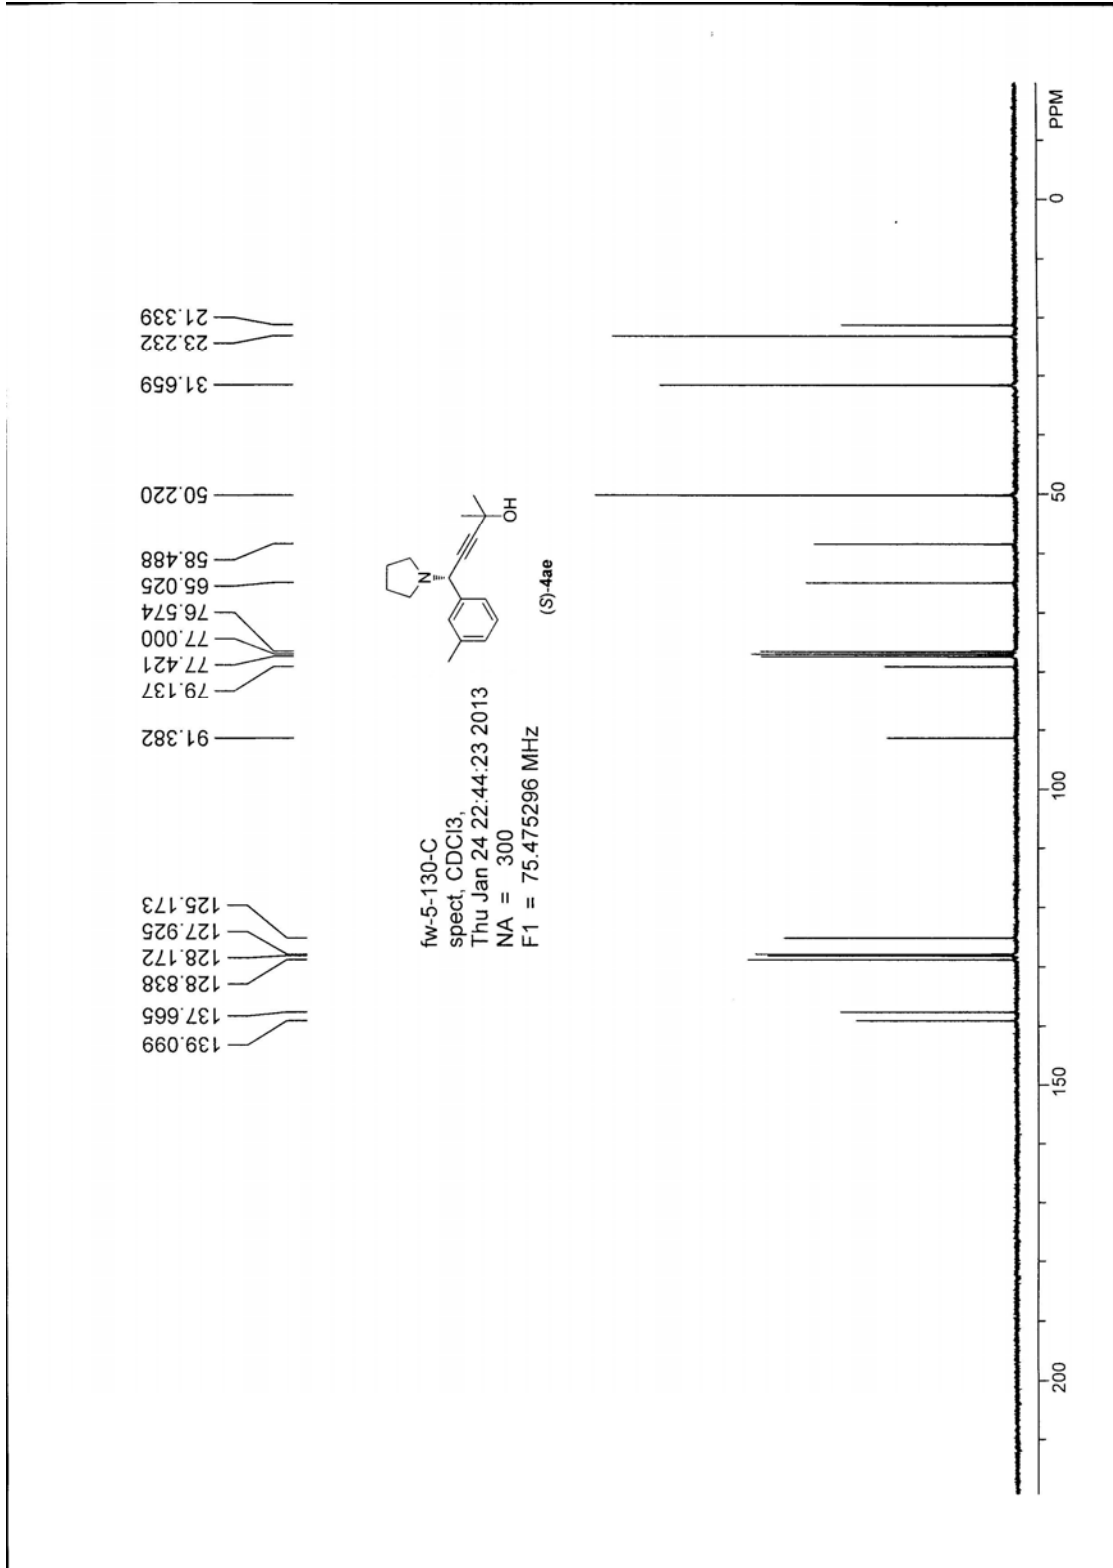



中国科学院上海有机化学研究所

Project Name: defaults for copy  
Reported by User: Breeze user (Breeze)

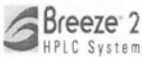

SAMPLE INFORMATION

|                   |                           |                  |                         |
|-------------------|---------------------------|------------------|-------------------------|
| Sample Name:      | fw-5-128-ad-h-90-10-1-214 | Acquired By:     | Breeze                  |
| Sample Type:      | 未知                        | Date Acquired:   | 2012/12/31 12:43:36 CST |
| Vial:             | 1                         | Acq. Method:     | zg90                    |
| Injection #:      | 13                        | Date Processed:  | 2012/12/31 12:51:37 CST |
| Injection Volume: | 10.00 ul                  | Channel Name:    | WD489 ChA               |
| Run Time:         | 200.00 Minutes            | Sample Set Name: |                         |

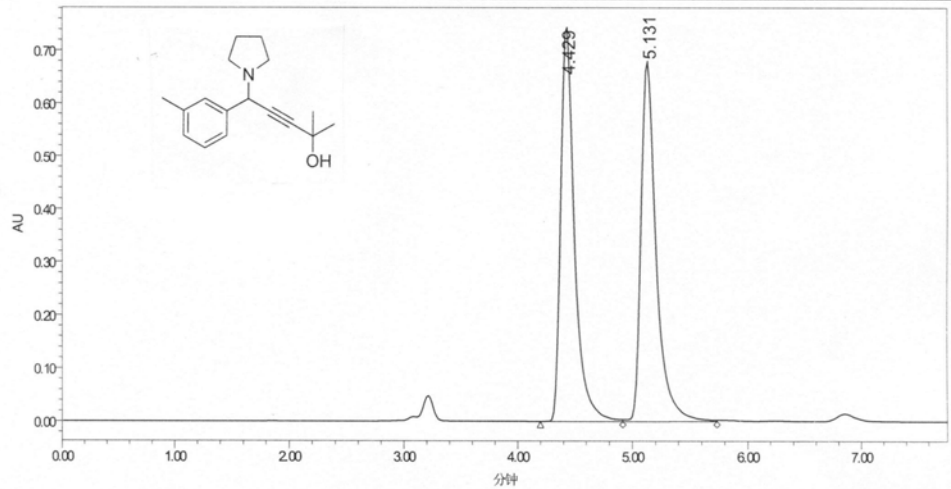

|   | RT<br>(min) | Area<br>(mVsec) | %Area | Height<br>(mV) | %<br>Height |
|---|-------------|-----------------|-------|----------------|-------------|
| 1 | 4.429       | 6215078         | 50.02 | 744938         | 52.31       |
| 2 | 5.131       | 6209036         | 49.98 | 679033         | 47.69       |

中国科学院上海有机化学研究所

Project Name: defaults for copy  
Reported by User: Breeze user (Breeze)

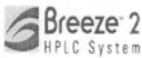

SAMPLE INFORMATION

|                   |                           |                  |                         |
|-------------------|---------------------------|------------------|-------------------------|
| Sample Name:      | fw-5-130-ad-h-90-10-1-214 | Acquired By:     | Breeze                  |
| Sample Type:      | 未知                        | Date Acquired:   | 2012/12/31 13:15:17 CST |
| Vial:             | 1                         | Acq. Method:     | zg90                    |
| Injection #:      | 16                        | Date Processed:  | 2012/12/31 13:24:13 CST |
| Injection Volume: | 10.00 uL                  | Channel Name:    | W2489 ChA               |
| Run Time:         | 200.00 Minutes            | Sample Set Name: |                         |

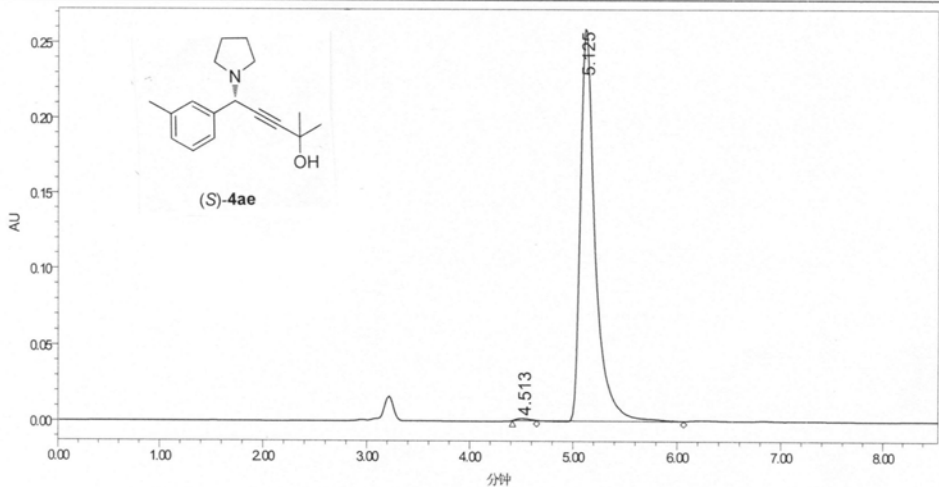

|   | RT<br>(min) | Area<br>(msec) | %Area | Height<br>(msec) | %<br>Height |
|---|-------------|----------------|-------|------------------|-------------|
| 1 | 4.513       | 11651          | 0.45  | 1373             | 0.52        |
| 2 | 5.125       | 2572642        | 99.55 | 260822           | 99.48       |

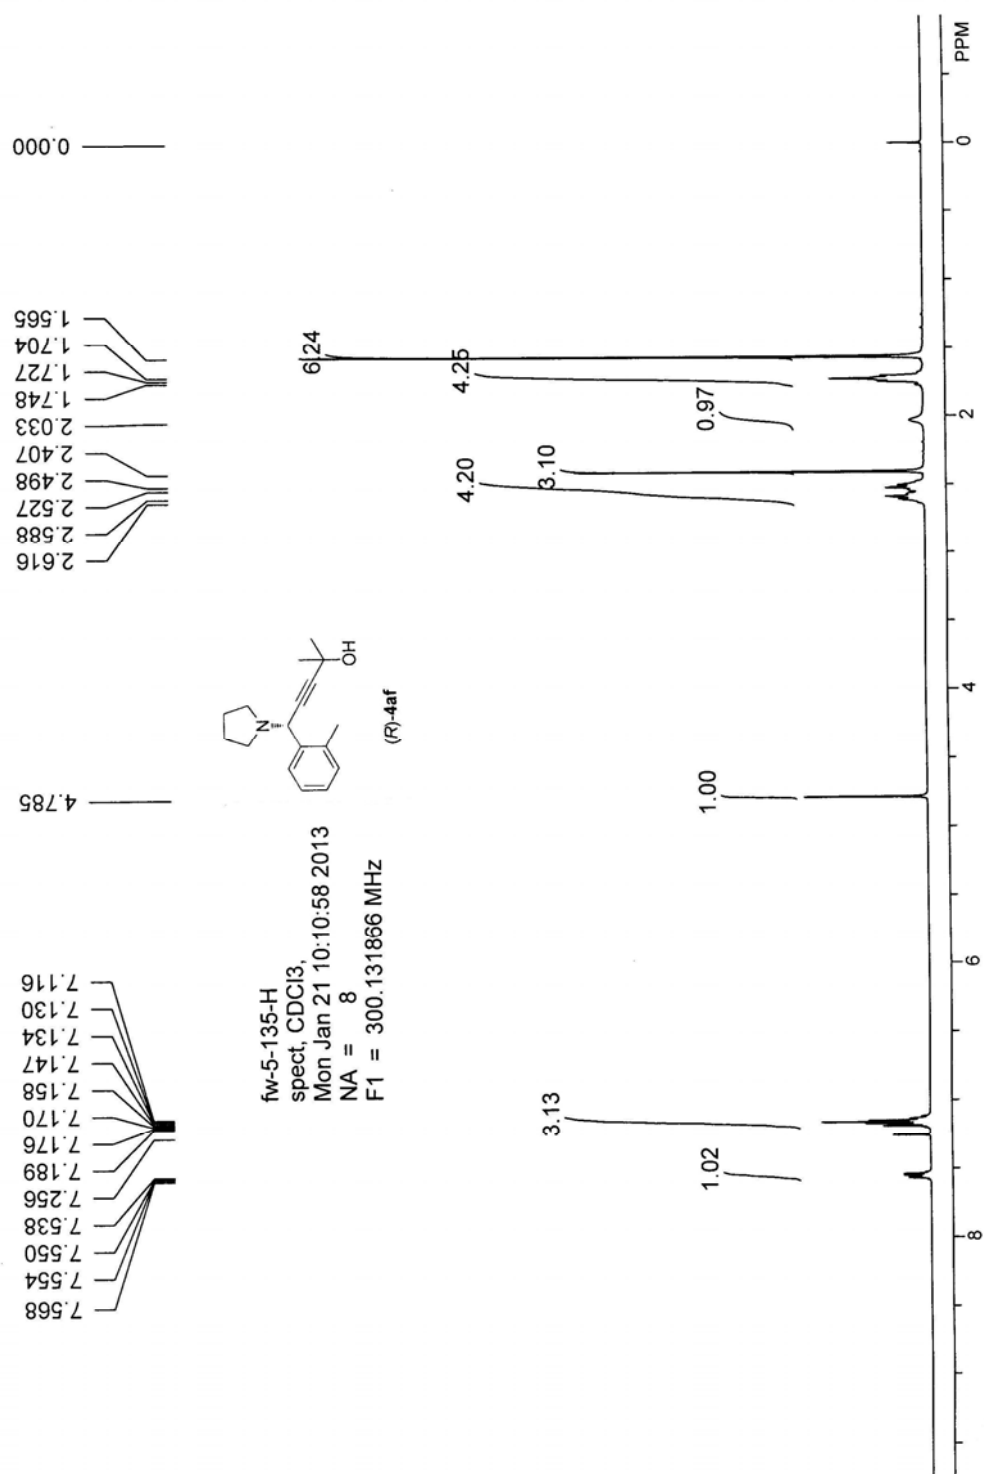

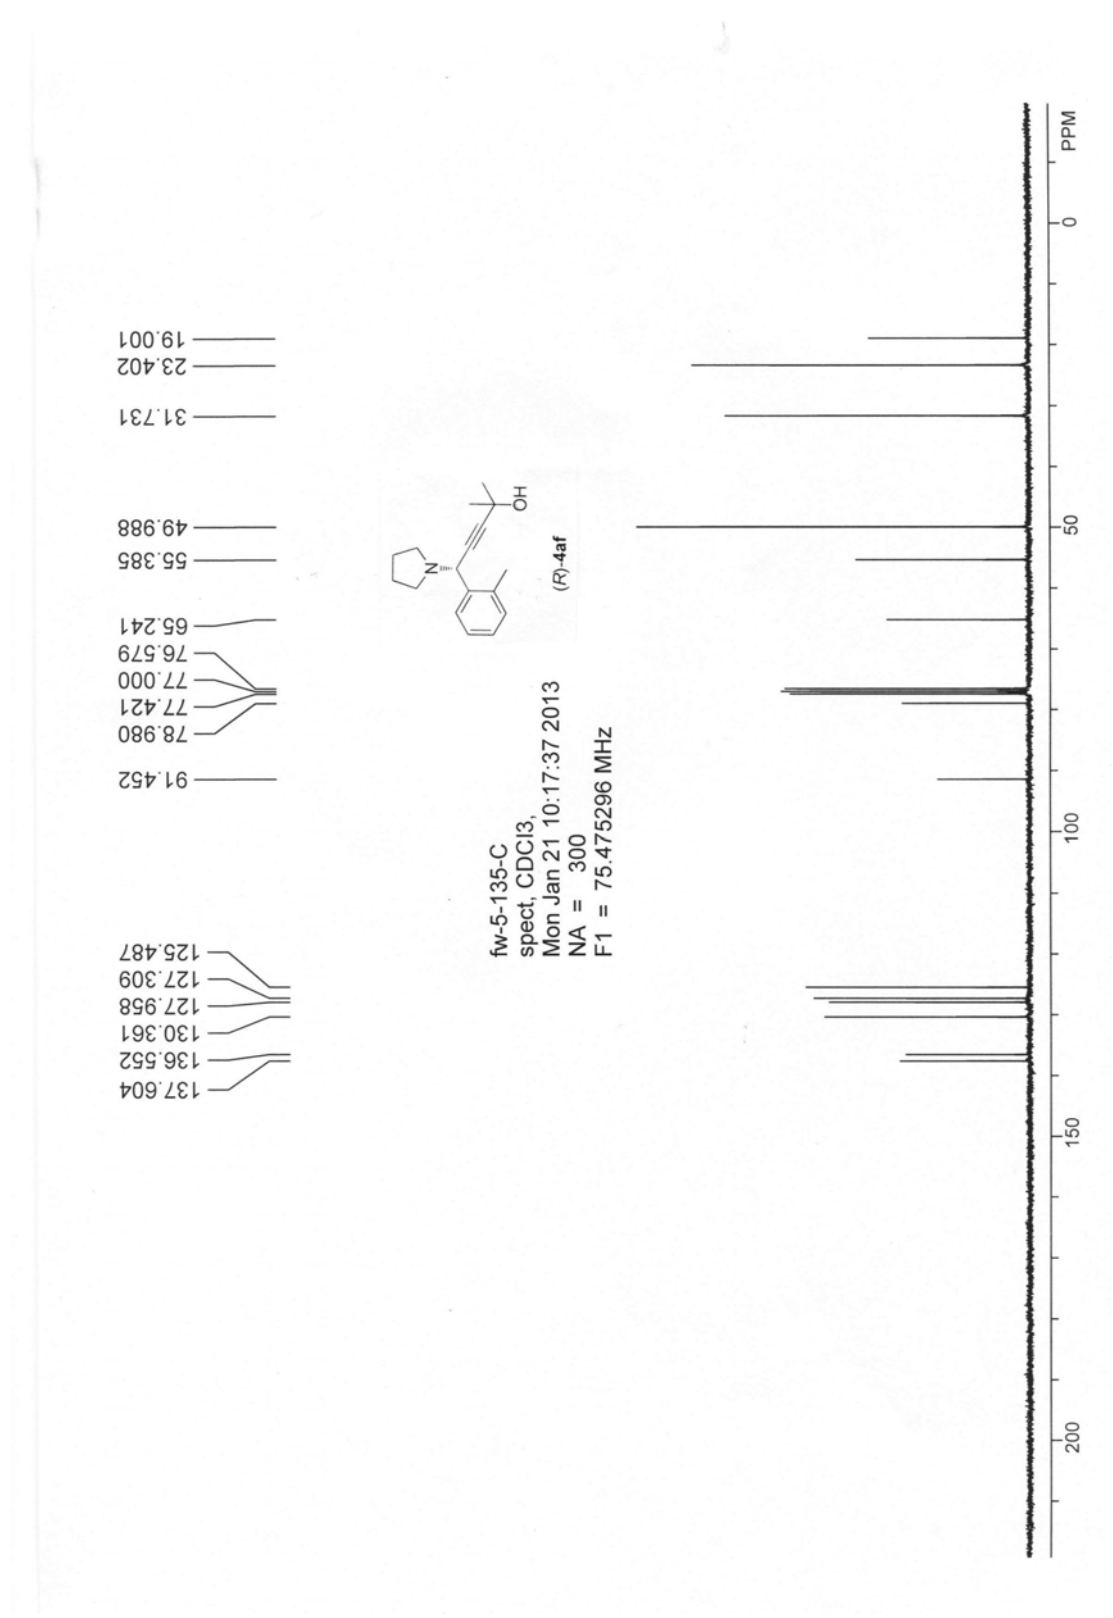

fw-5-133-ad-h-90-10-0.7-214

实验时间: 2013-01-06, 9:19:16      报告时间: 2013-01-06, 14:23:17  
谱图文件: D:\zhuguangjiong\fw\20130106\fw-5-133-ad-h-90-10-0.7-214.org

实验内容简介:  
ad-h 90/10  
0.7ml/min 214nm

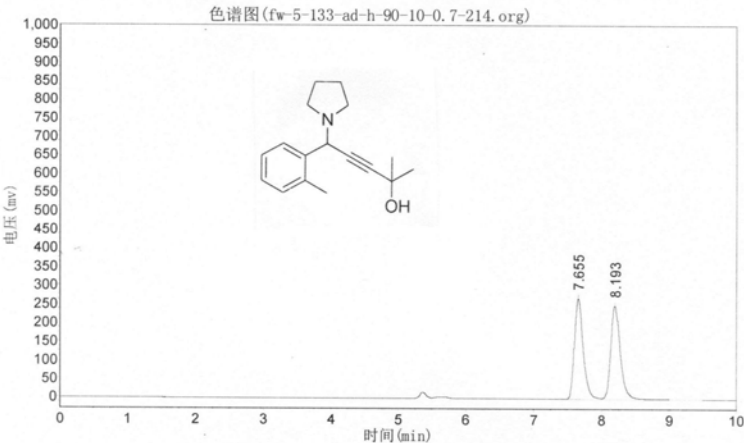

分析结果表

| 峰号 | 峰名 | 保留时间  | 峰高         | 峰面积         | 含量       |
|----|----|-------|------------|-------------|----------|
| 1  |    | 7.655 | 270311.906 | 2452380.000 | 49.5648  |
| 2  |    | 8.193 | 250438.188 | 2495450.750 | 50.4352  |
| 总计 |    |       | 520750.094 | 4947830.750 | 100.0000 |

fw-5-135-ad-h-90-10-0.7-214

实验时间: 2013-01-06, 10:33:30      报告时间: 2013-01-06, 14:24:26  
谱图文件: D:\zhuguangjiong\fw\20130106\fw-5-135-ad-h-90-10-0.7-214....org

实验内容简介:  
ad-h 90/10  
0.7ml/min 214nm

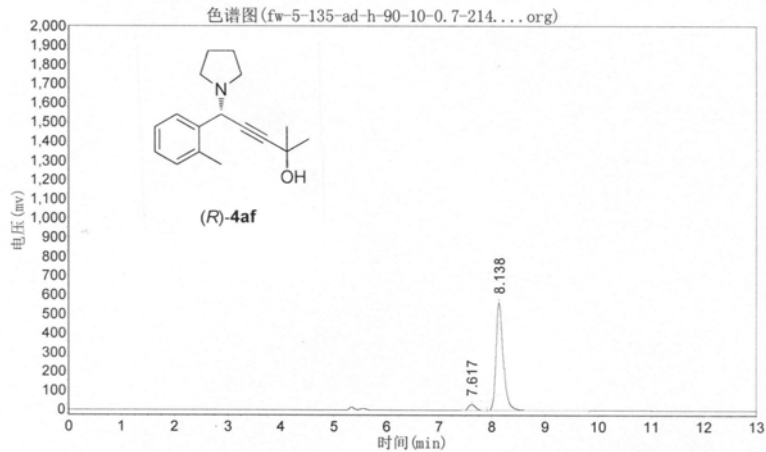

分析结果表

| 峰号 | 峰名 | 保留时间  | 峰高         | 峰面积         | 含量       |
|----|----|-------|------------|-------------|----------|
| 1  |    | 7.617 | 30079.965  | 267815.125  | 4.6864   |
| 2  |    | 8.138 | 561922.875 | 5446921.500 | 95.3136  |
| 总计 |    |       | 592002.840 | 5714736.625 | 100.0000 |

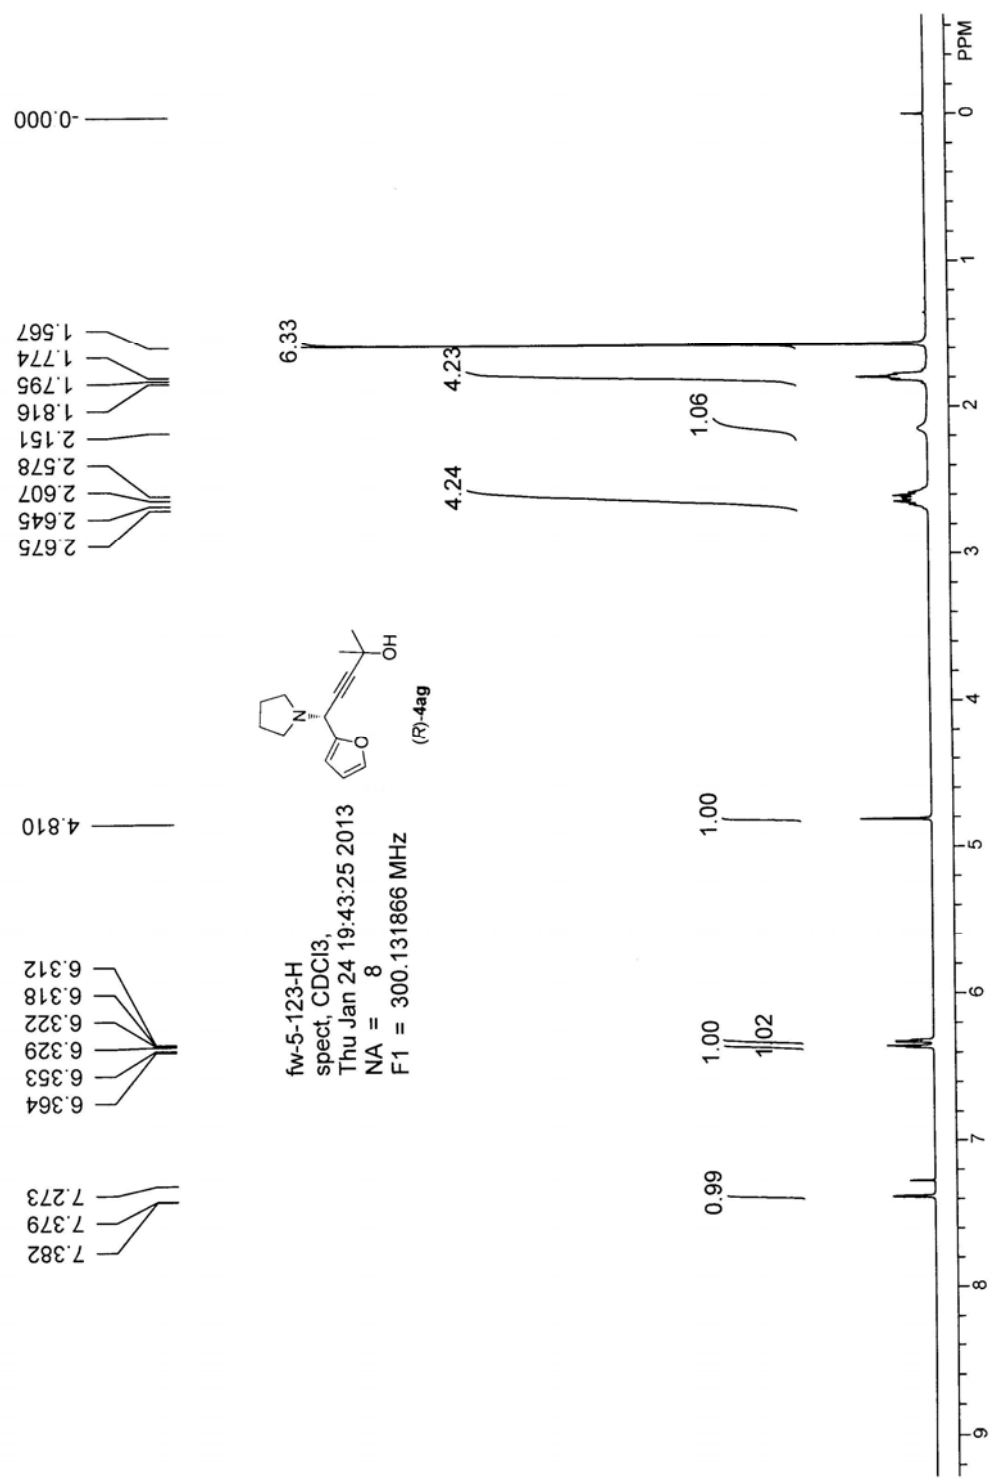

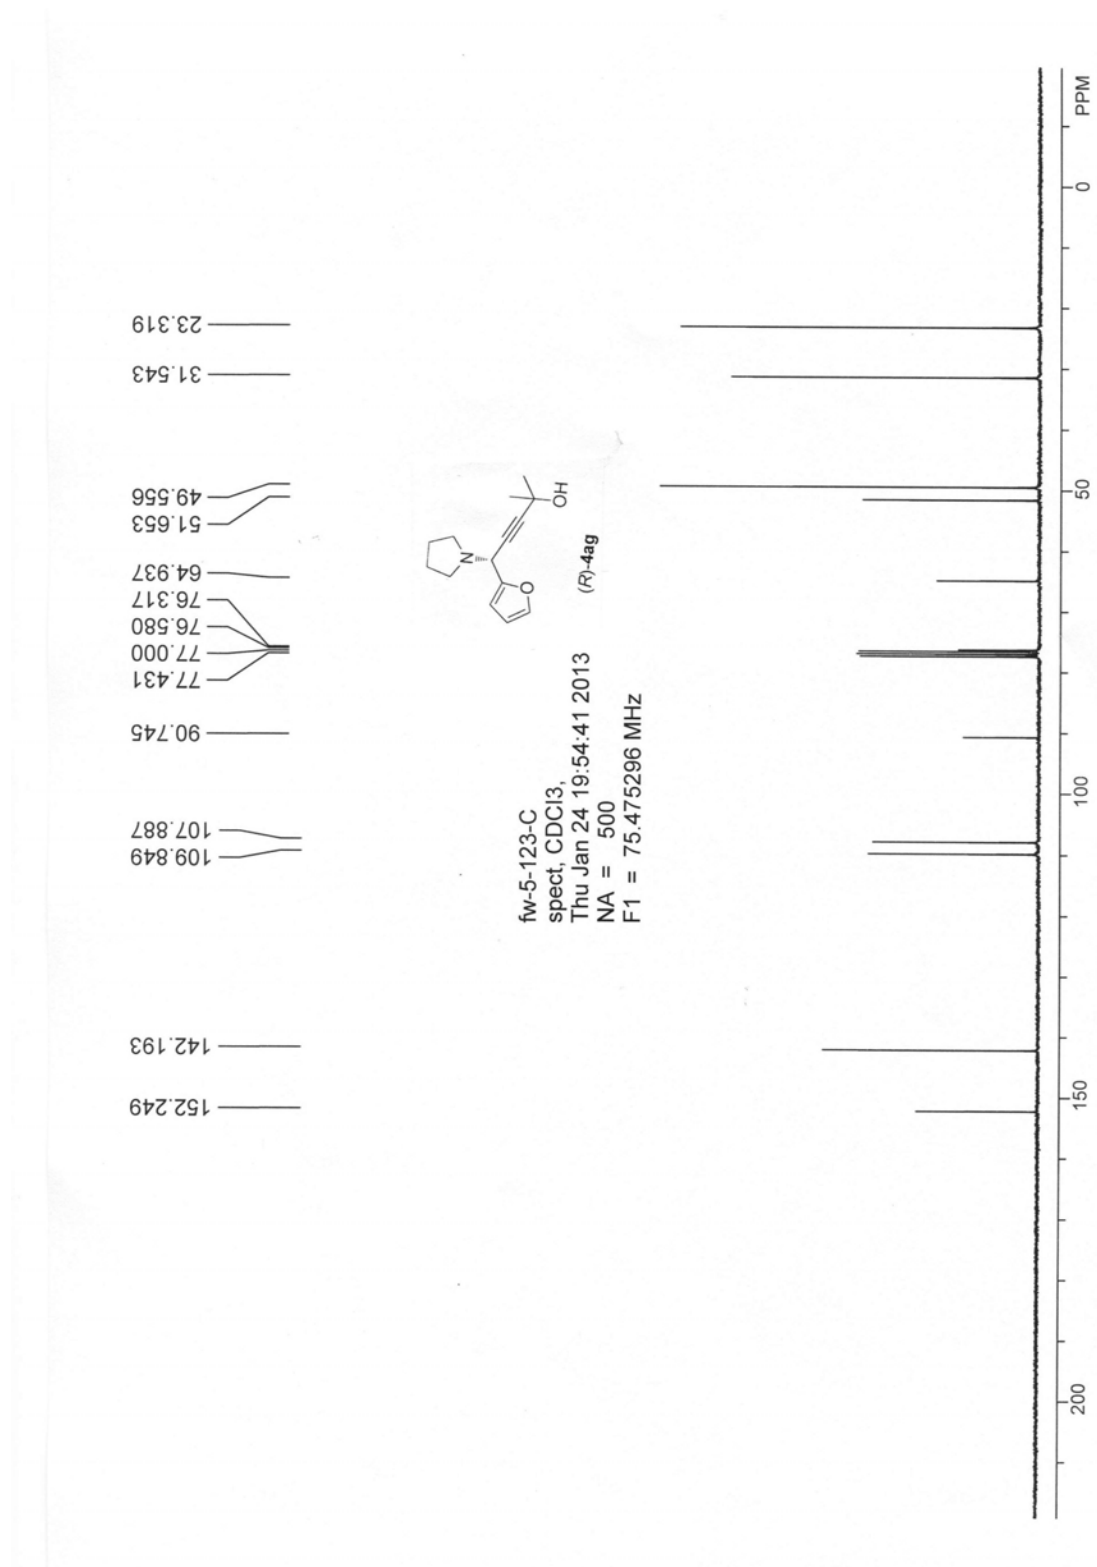



中国科学院上海有机化学研究所

Project Name: defaults for copy  
Reported by User: Breeze user (Breeze)

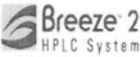

SAMPLE INFORMATION

|                   |                       |                  |                        |
|-------------------|-----------------------|------------------|------------------------|
| Sample Name:      | FE5-122-ADH95-5-1-214 | Acquired By:     | Breeze                 |
| Sample Type:      | 未知                    | Date Acquired:   | 2012/12/25 8:57:39 CST |
| Vial:             | 1                     | Acq. Method:     | zg35                   |
| Injection #:      | 21                    | Date Processed:  | 2012/12/25 9:11:03 CST |
| Injection Volume: | 10.00 uL              | Channel Name:    | V2489 ChA              |
| Run Time:         | 200.00 Minutes        | Sample Set Name: |                        |

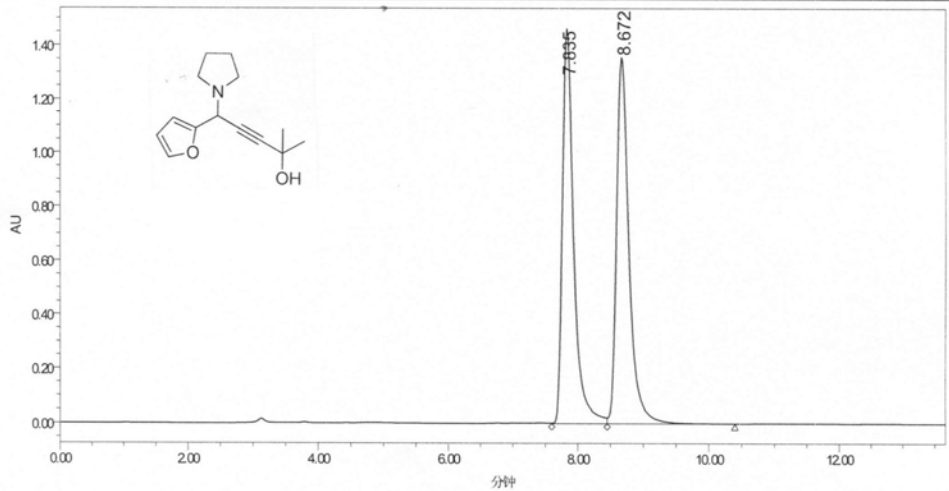

|   | RT<br>(min) | Area<br>(AU*Sec) | %Area | Height<br>(AU) | %<br>Height |
|---|-------------|------------------|-------|----------------|-------------|
| 1 | 7.835       | 17581232         | 49.61 | 1462540        | 51.80       |
| 2 | 8.672       | 17856682         | 50.39 | 1360708        | 48.20       |

中国科学院上海有机化学研究所

Project Name: defaults for copy

Reported by User: Breeze user (Breeze)

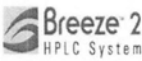

SAMPLE INFORMATION

|                   |                        |                  |                        |
|-------------------|------------------------|------------------|------------------------|
| Sample Name:      | FE5-123-AD-H95-5-1-214 | Acquired By:     | Breeze                 |
| Sample Type:      | 未知                     | Date Acquired:   | 2012/12/25 9:30:44 CST |
| Vial:             | 1                      | Acq. Method:     | zg95                   |
| Injection #:      | 23                     | Date Processed:  | 2012/12/25 9:58:43 CST |
| Injection Volume: | 10.00 ul               | Channel Name:    | V2489 ChA              |
| Run Time:         | 200.00 Minutes         | Sample Set Name: |                        |

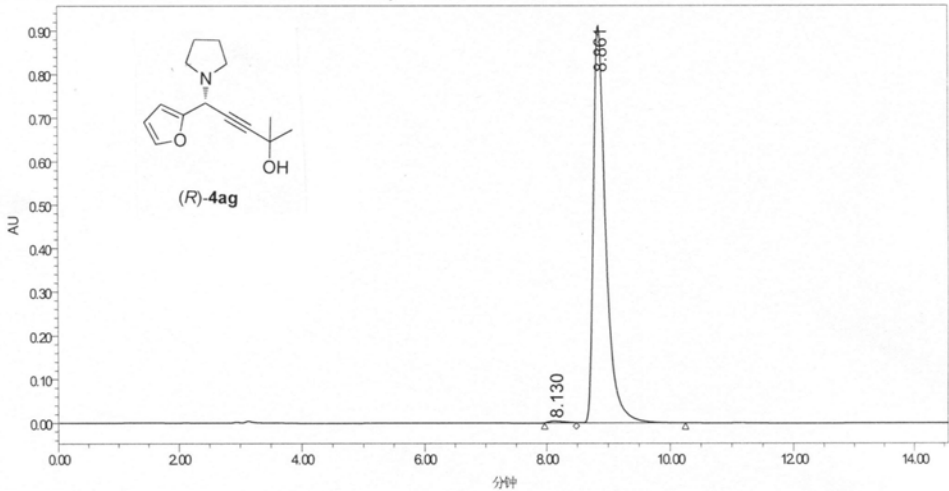

|   | RT<br>(min) | Area<br>(峰面积) | %Area | Height<br>(峰高) | %<br>Height |
|---|-------------|---------------|-------|----------------|-------------|
| 1 | 8.130       | 67368         | 0.53  | 3752           | 0.41        |
| 2 | 8.861       | 12639213      | 99.47 | 913945         | 99.59       |

Report Method: 未知

Page: 1 (共 1)

Printed: 2012/12/25

9:59:06 PM

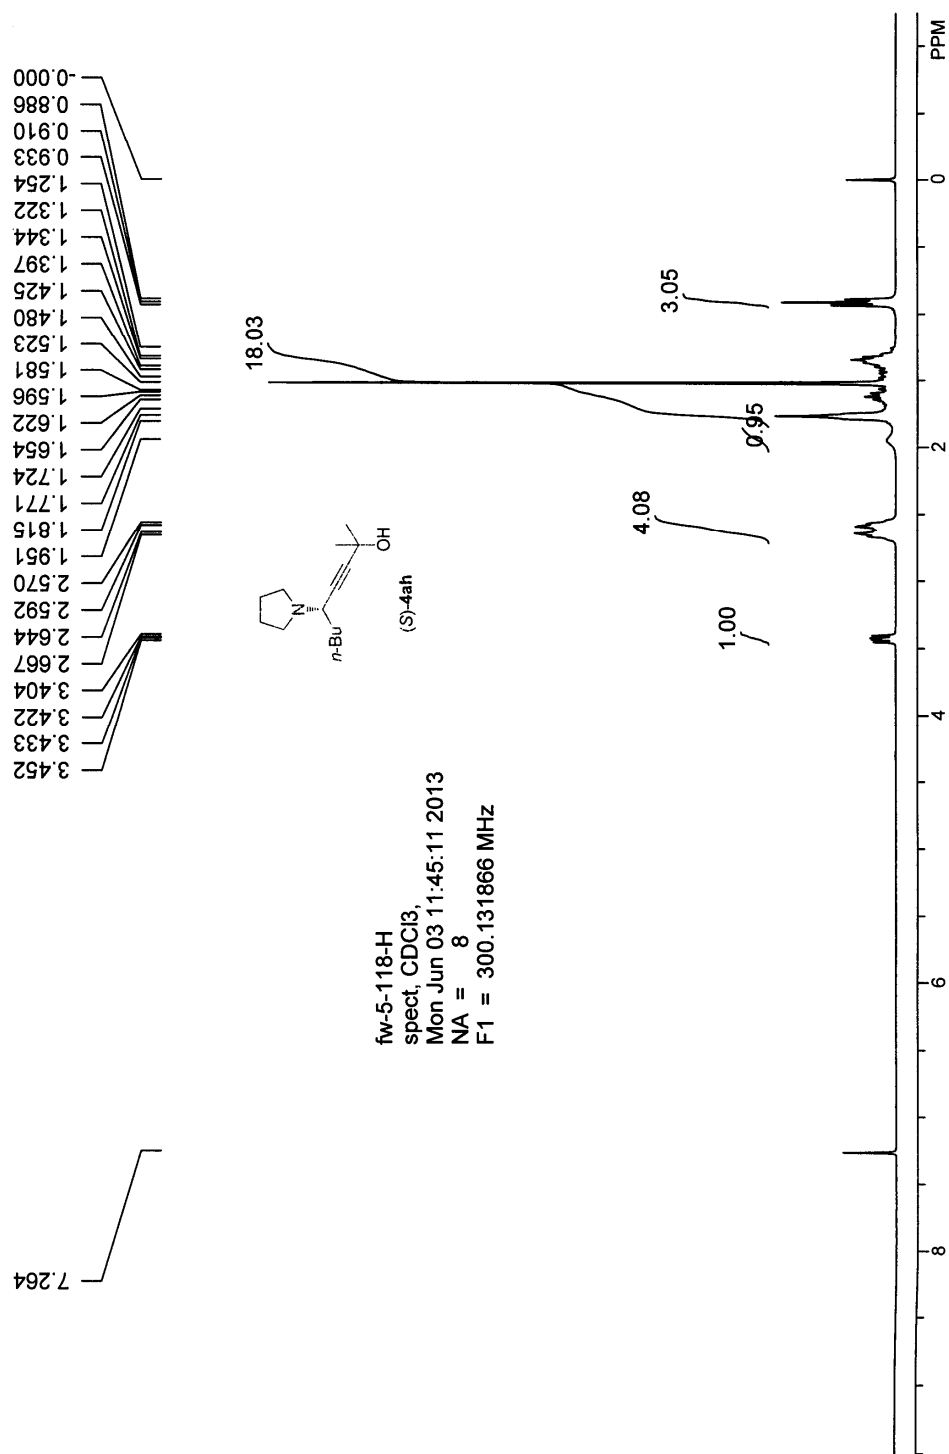

fw-5-118-H  
spect, CDCl<sub>3</sub>,  
Mon Jun 03 11:45:11 2013  
NA = 8  
F1 = 300.131866 MHz

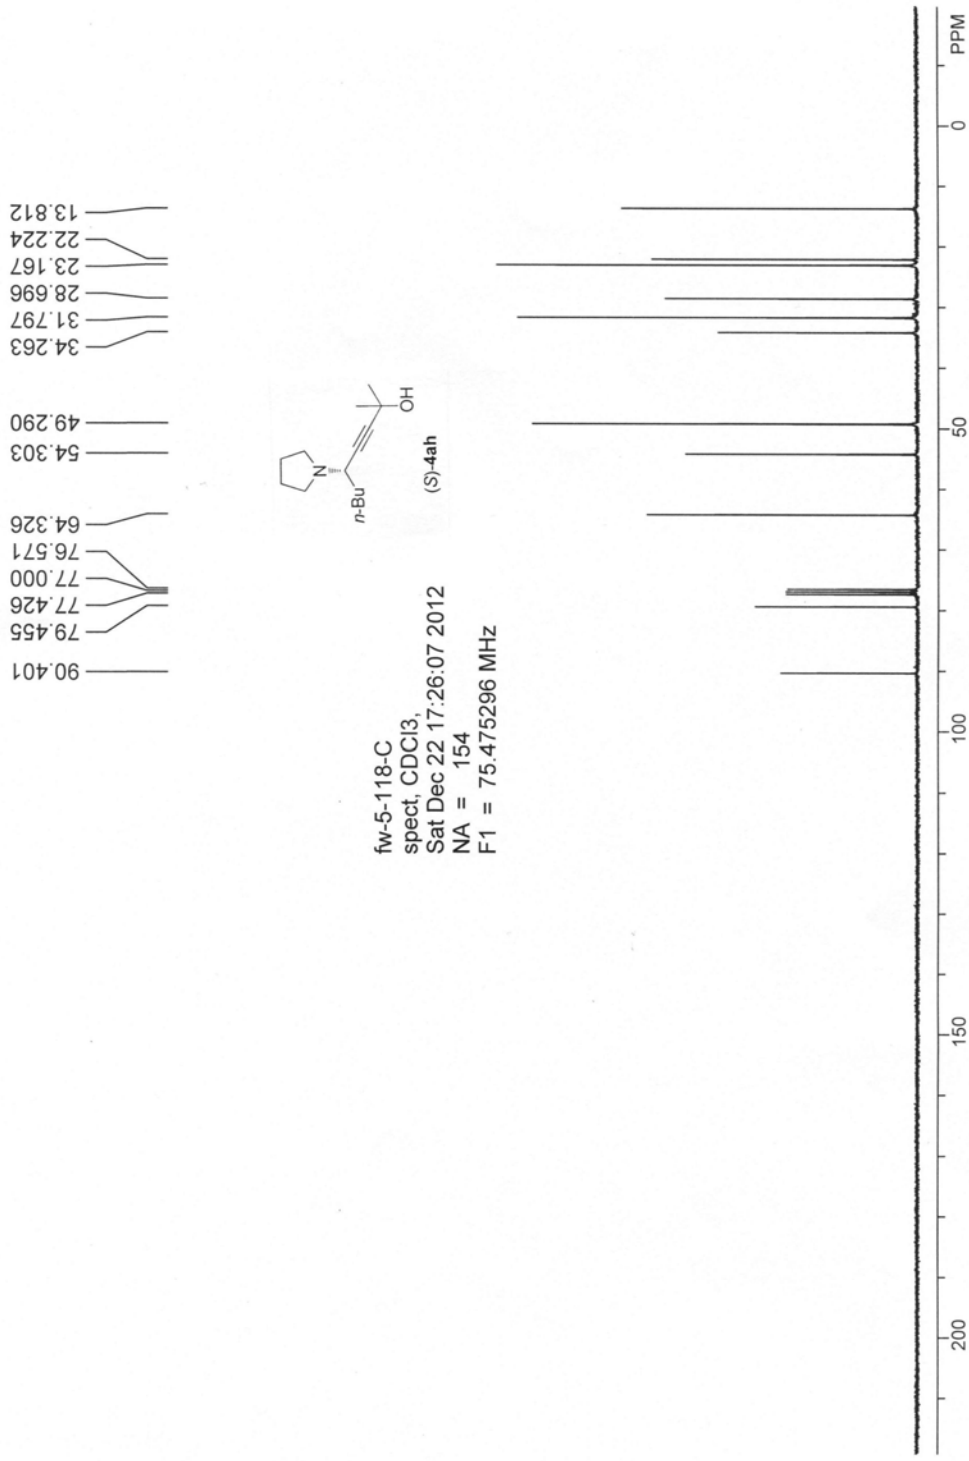

fw-5-115-pc-2-100-1-1-214

实验时间: 2012-12-26, 10:04:46      报告时间: 2012-12-26, 14:45:58  
谱图文件: D:\zhuguangjiong\fw\20121225\fw-5-115-pc-2-100-1-1-214.org

实验内容简介:  
pc-2 100+1  
1ml/min 214nm

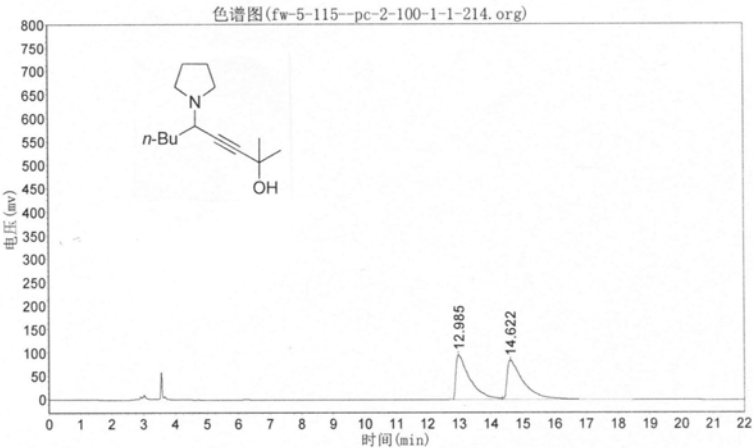

分析结果表

| 峰号 | 峰名 | 保留时间   | 峰高         | 峰面积         | 含量       |
|----|----|--------|------------|-------------|----------|
| 1  |    | 12.985 | 95750.828  | 2939090.750 | 49.3412  |
| 2  |    | 14.622 | 84362.391  | 3017570.750 | 50.6588  |
| 总计 |    |        | 180113.219 | 5956661.500 | 100.0000 |

fw-5-118-pc-2-100-1-1-214

实验时间: 2012-12-26, 12:43:00      报告时间: 2012-12-26, 14:44:46  
谱图文件: D:\zhuguangjiong\fw\20121225\fw-5-118-pc-2-100-1-1-214...org

实验内容简介:  
pc-2 100+1  
1ml/min 214nm

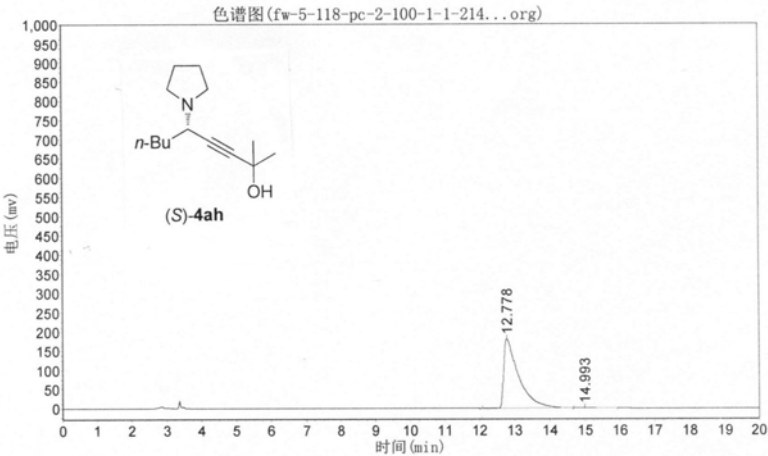

分析结果表

| 峰号 | 峰名 | 保留时间   | 峰高         | 峰面积         | 含量       |
|----|----|--------|------------|-------------|----------|
| 1  |    | 12.778 | 181590.266 | 5381721.000 | 99.4167  |
| 2  |    | 14.993 | 1049.296   | 31576.246   | 0.5833   |
| 总计 |    |        | 182639.561 | 5413297.246 | 100.0000 |

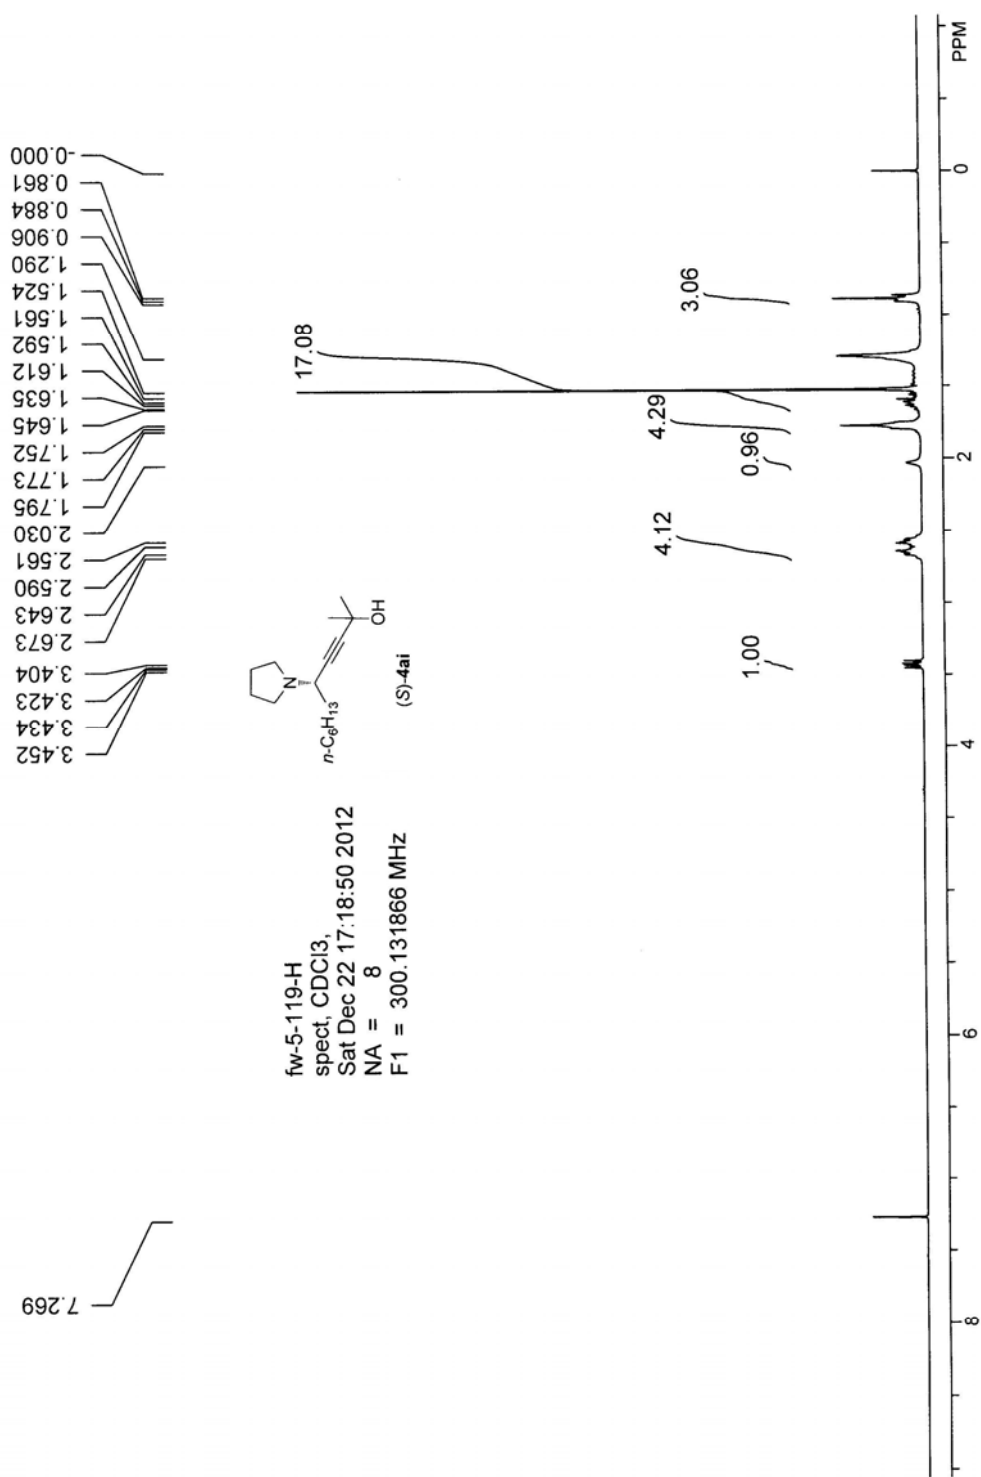

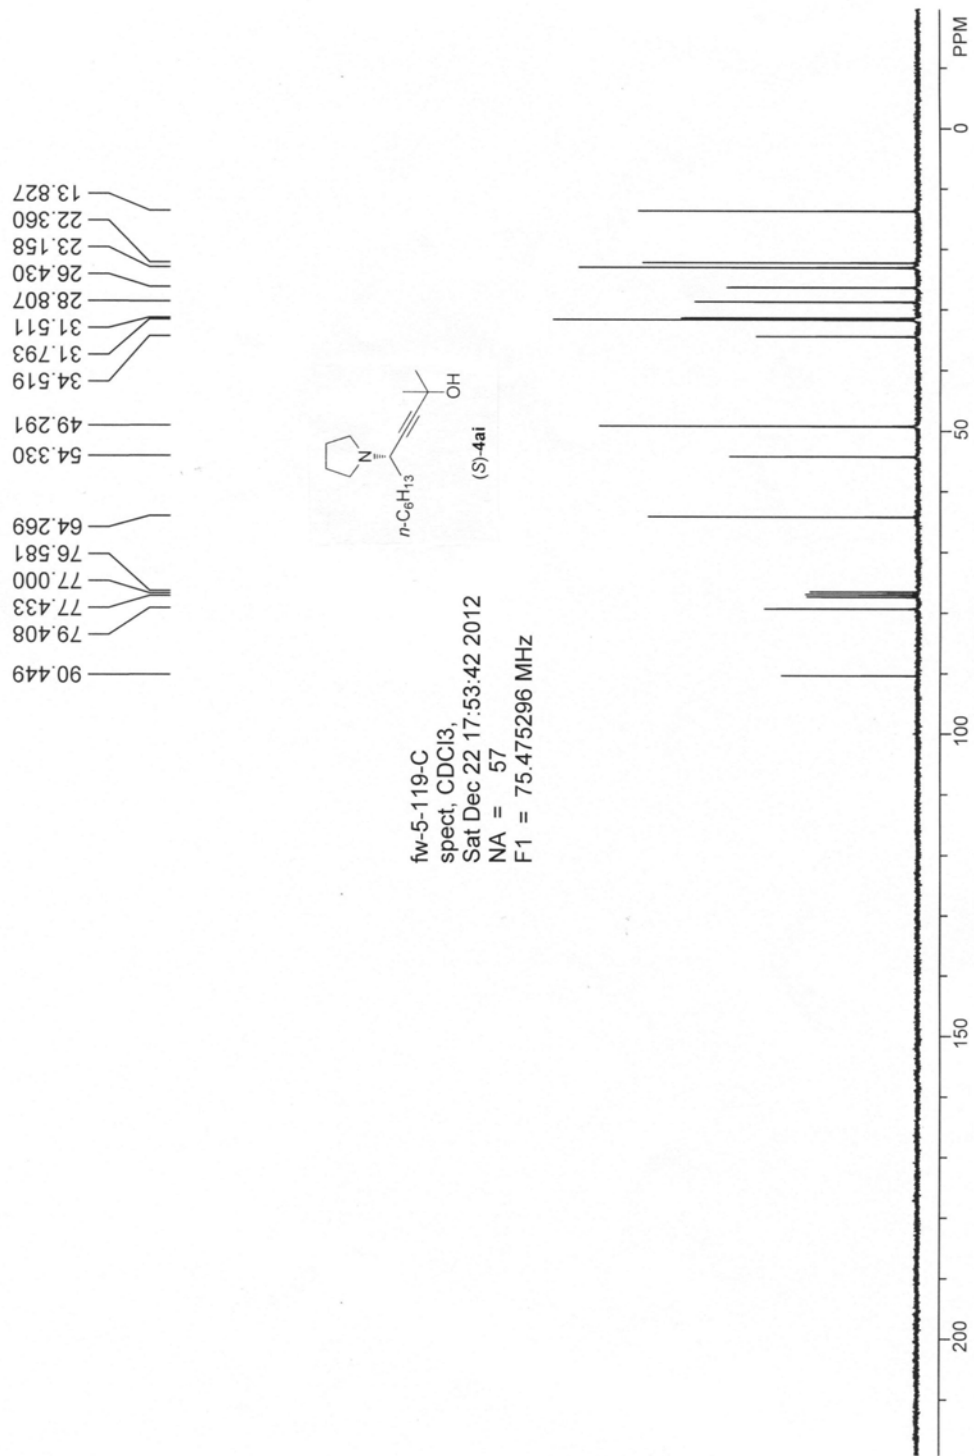



中国科学院上海有机化学研究所

Project Name: defaults for copy  
Reported by User: Breeze user (Breeze)

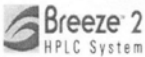

SAMPLE INFORMATION

|                   |                        |                  |                         |
|-------------------|------------------------|------------------|-------------------------|
| Sample Name:      | PW5-117-ADH200-1-1-214 | Acquired By:     | Breeze                  |
| Sample Type:      | 未知                     | Date Acquired:   | 2012/12/26 10:08:24 CST |
| Vial:             | 1                      | Acq. Method:     | zg100                   |
| Injection #:      | 40                     | Date Processed:  | 2012/12/26 13:54:31 CST |
| Injection Volume: | 10.00 ul               | Channel Name:    | W2489 ChA               |
| Run Time:         | 200.00 Minutes         | Sample Set Name: |                         |

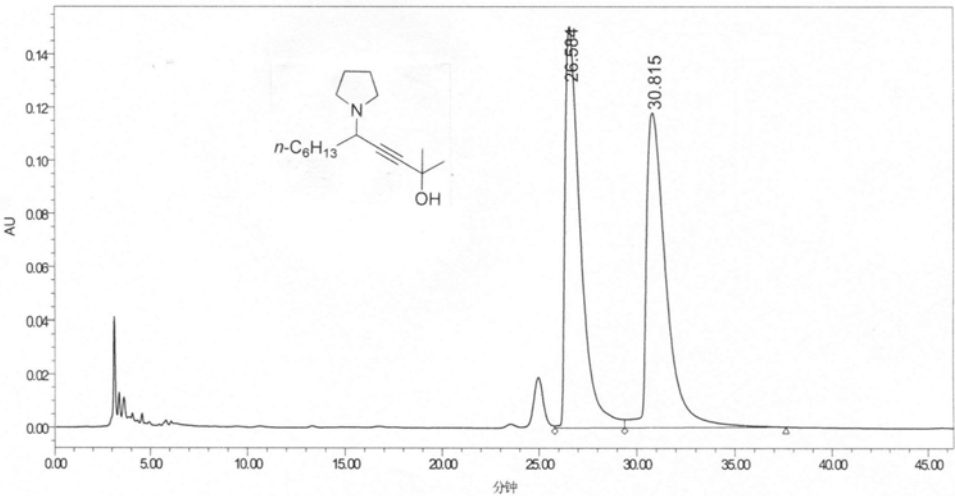

|   | RT<br>(min) | Area<br>(AU*sec) | %Area | Height<br>(AU) | %<br>Height |
|---|-------------|------------------|-------|----------------|-------------|
| 1 | 26.584      | 8212112          | 50.01 | 150534         | 56.11       |
| 2 | 30.815      | 8208740          | 49.99 | 117735         | 43.89       |



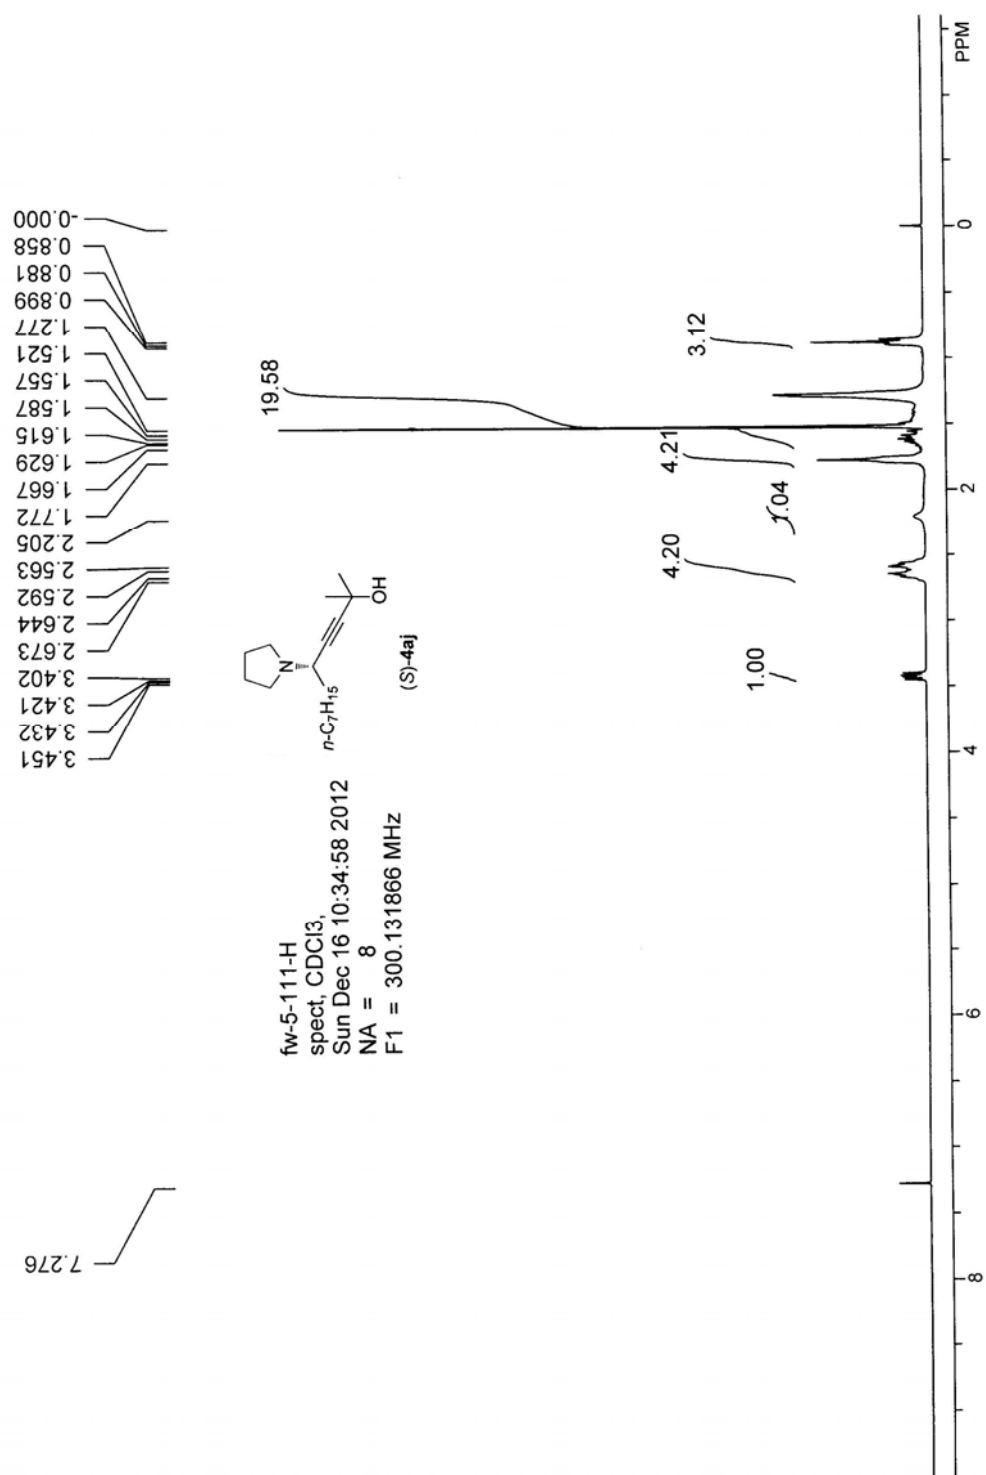

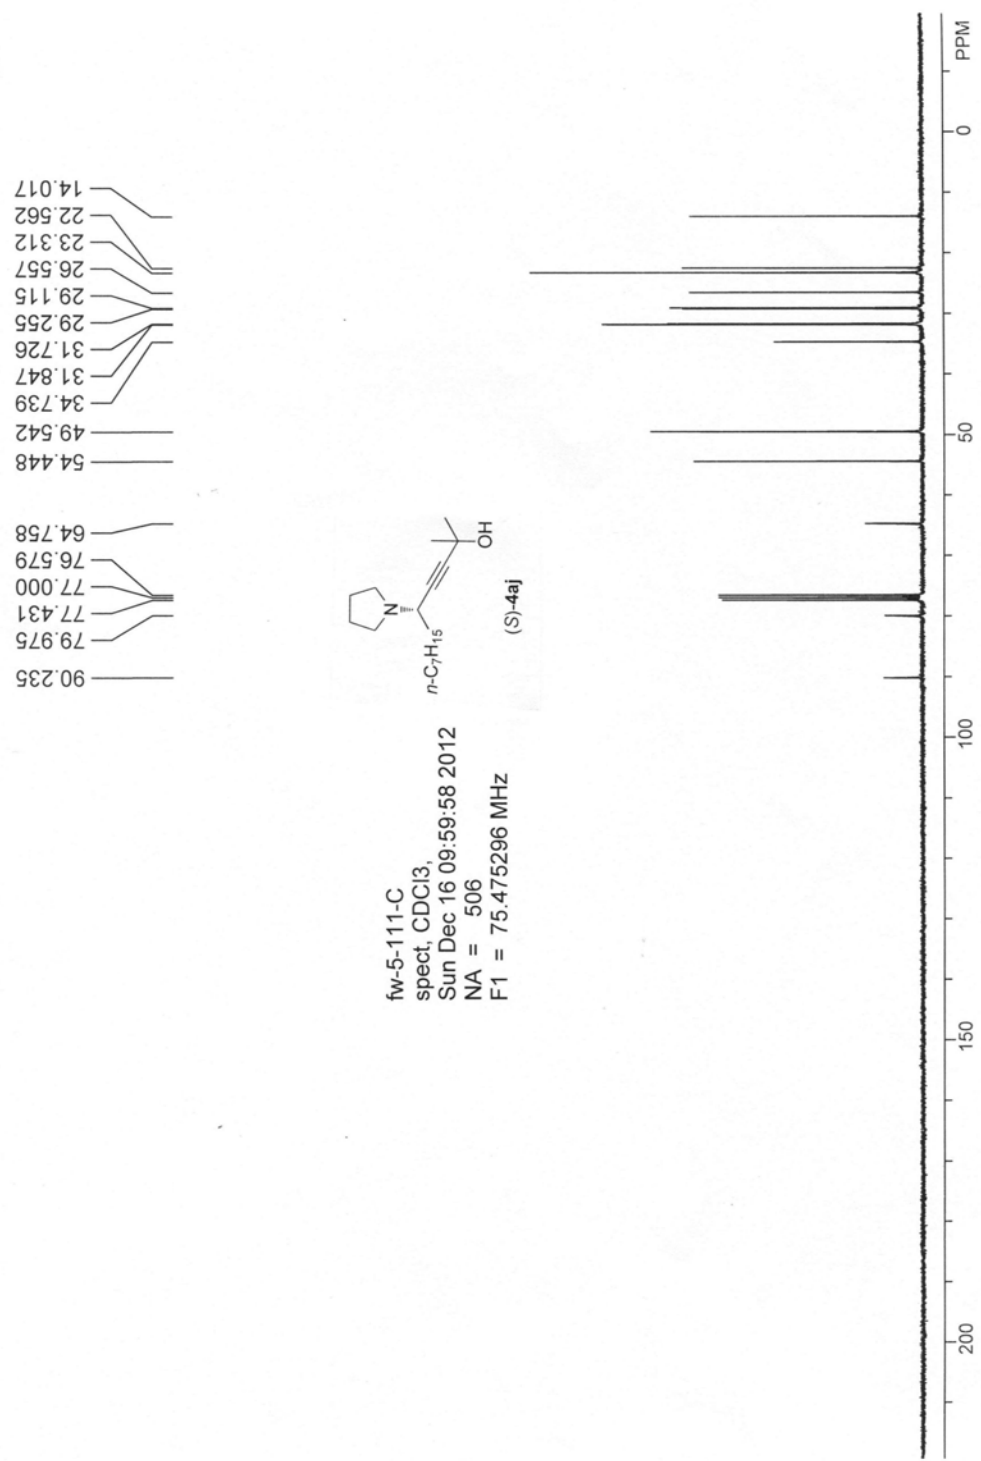

fw-5-107-od-h-200-1-1-214

实验时间: 2012-12-18, 11:38:54      报告时间: 2012-12-18, 11:57:22  
谱图文件: D:\zhuguangjiong\fw\20121218\fw-5-107-od-h-200-1-1-214..org

实验内容简介:  
od-h 200+1  
1ml/min 214nm

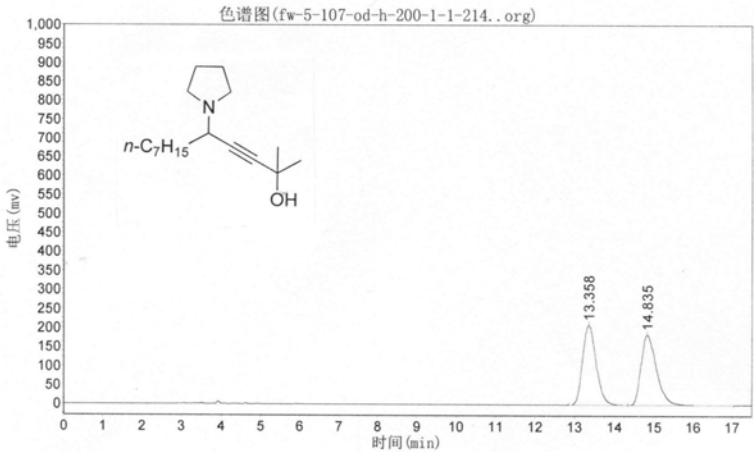

分析结果表

| 峰号 | 峰名 | 保留时间   | 峰高         | 峰面积          | 含量       |
|----|----|--------|------------|--------------|----------|
| 1  |    | 13.358 | 210753.016 | 5055276.000  | 49.7265  |
| 2  |    | 14.835 | 185570.969 | 5110882.000  | 50.2735  |
| 总计 |    |        | 396323.984 | 10166158.000 | 100.0000 |

fw-5-111-od-h-200-1-1-214

实验时间: 2012-12-18, 10:38:19      报告时间: 2012-12-18, 11:55:41  
谱图文件: D:\zhuguangjiong\fw\20121218\fw-5-111-od-h-200-1-1-214.org

实验内容简介:  
od-h 200+1  
1ml/min 214nm

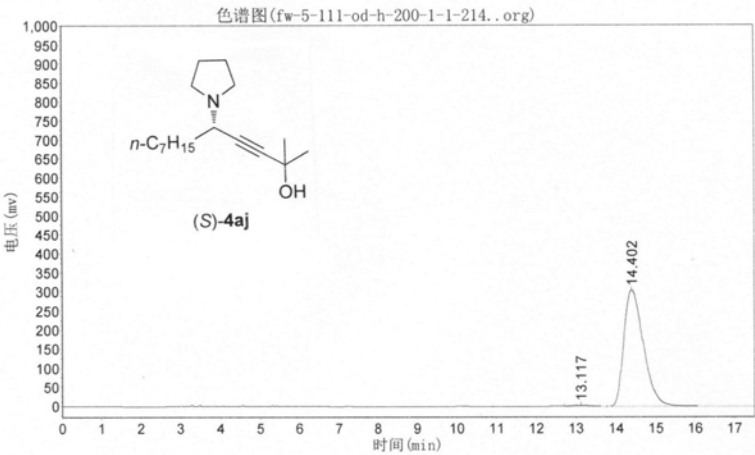

分析结果表

| 峰号 | 峰名 | 保留时间   | 峰高         | 峰面积          | 含量       |
|----|----|--------|------------|--------------|----------|
| 1  |    | 13.117 | 3995.255   | 131974.734   | 1.2459   |
| 2  |    | 14.402 | 303300.688 | 10460947.000 | 98.7541  |
| 总计 |    |        | 307295.942 | 10592921.734 | 100.0000 |

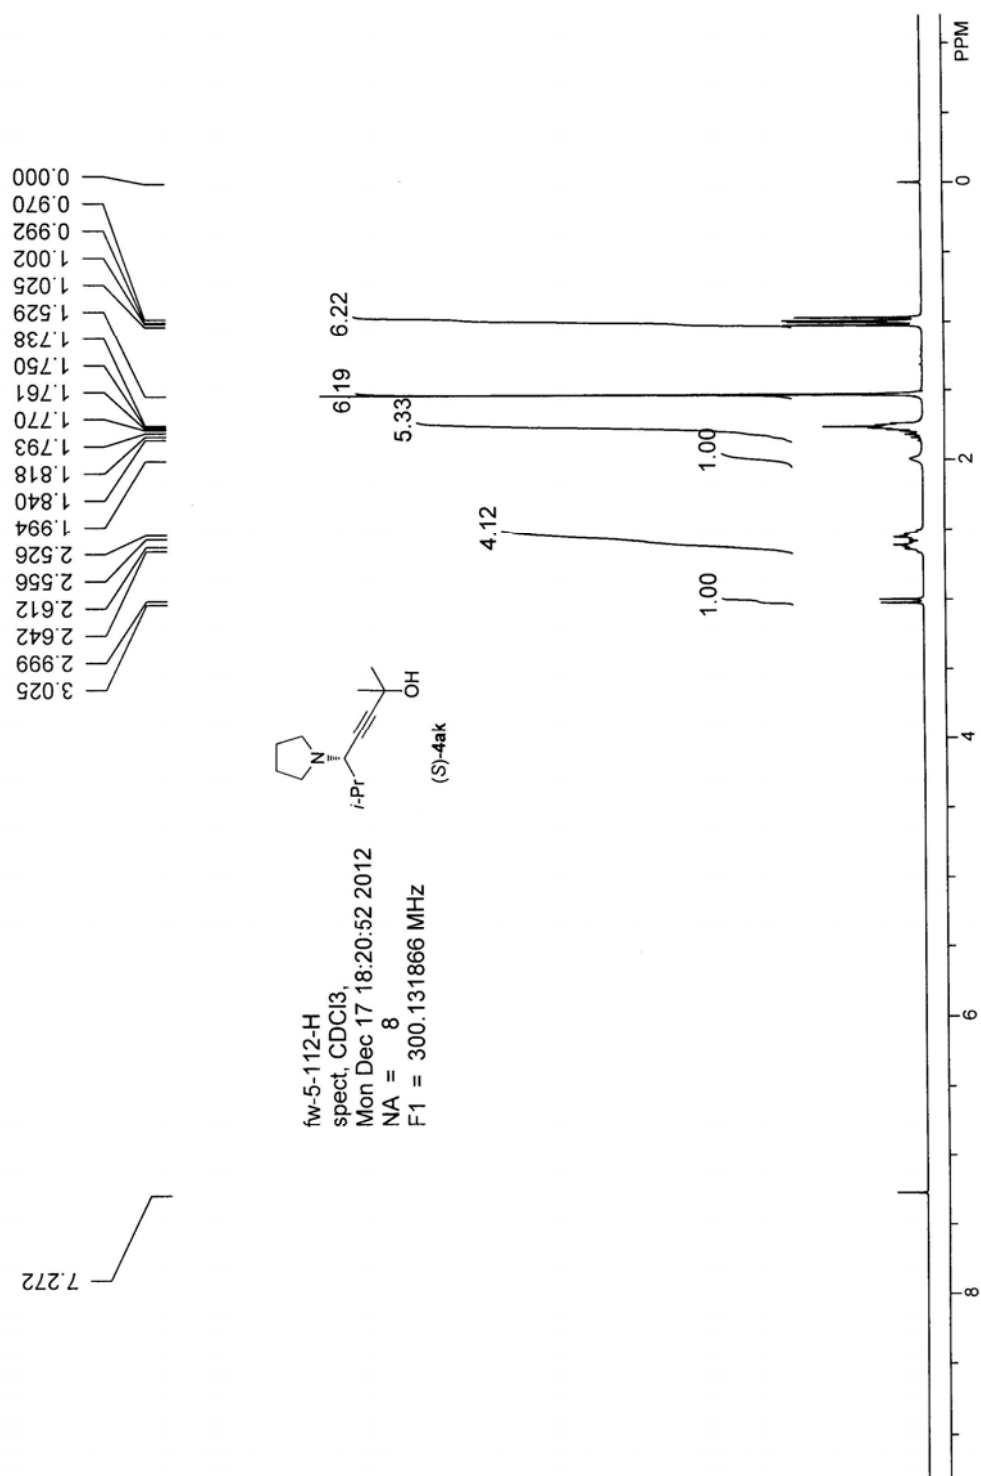

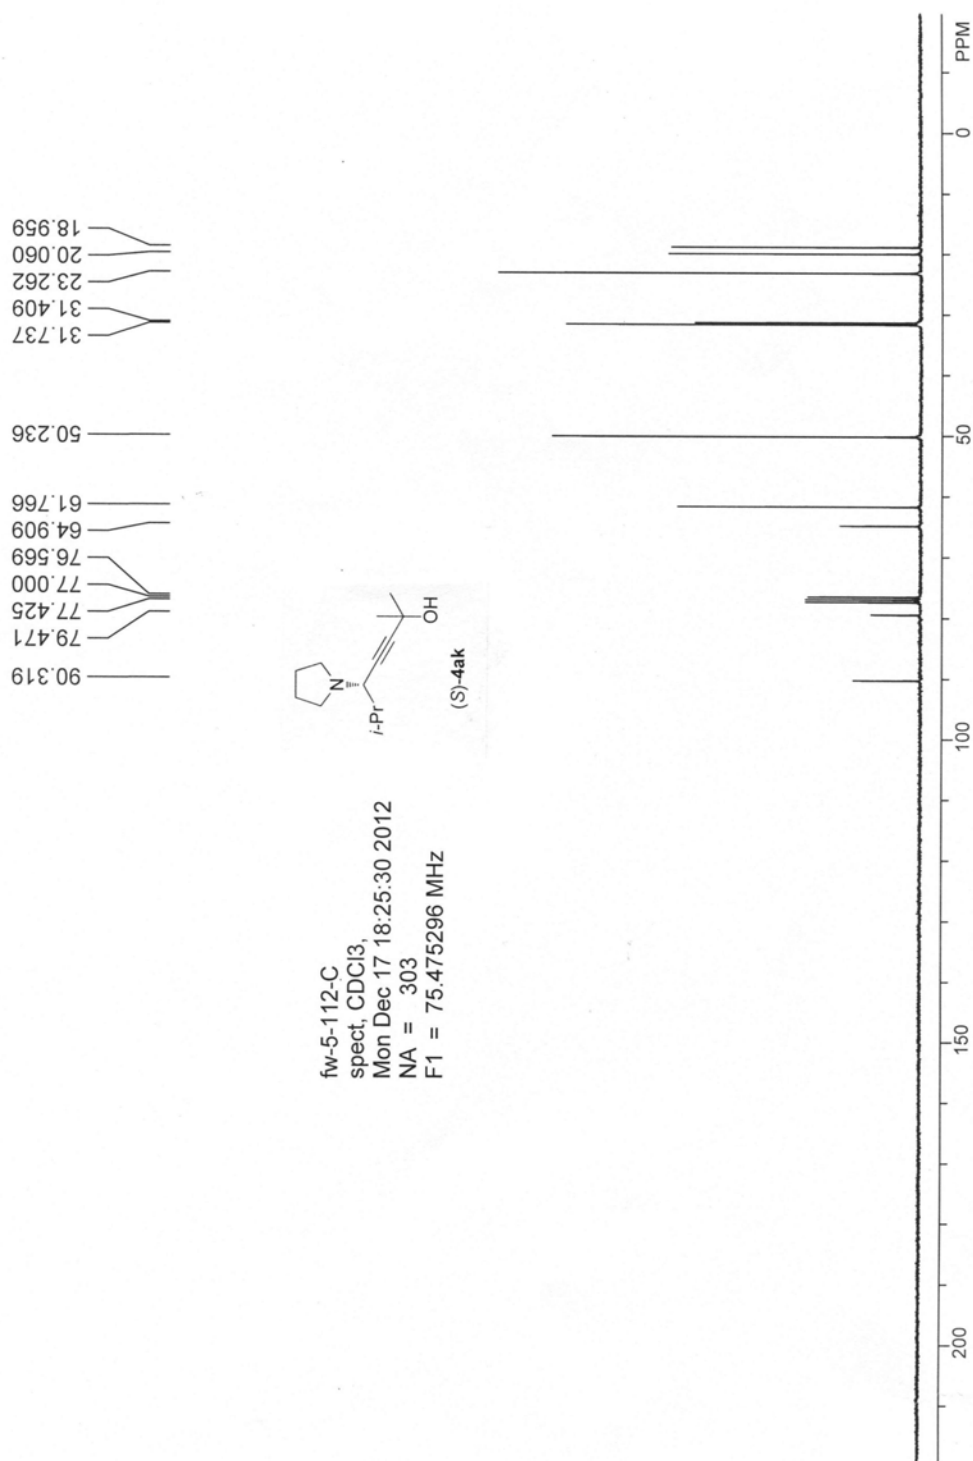



中国科学院上海有机化学研究所

Project Name: defaults for copy

Reported by User: Breeze user (Breeze)

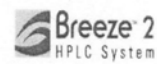

SAMPLE INFORMATION

|                   |                             |                  |                         |
|-------------------|-----------------------------|------------------|-------------------------|
| Sample Name:      | fw-5-110-ad-h-100-1-0.5-214 | Acquired By:     | Breeze                  |
| Sample Type:      | 未知                          | Date Acquired:   | 2012/12/19 16:01:01 CST |
| Vial:             | 1                           | Acq. Method:     | zg100                   |
| Injection #:      | 22                          | Date Processed:  | 2012/12/19 16:34:33 CST |
| Injection Volume: | 10.00 ul                    | Channel Name:    | V2489 ChA               |
| Run Time:         | 33.00 Minutes               | Sample Set Name: |                         |

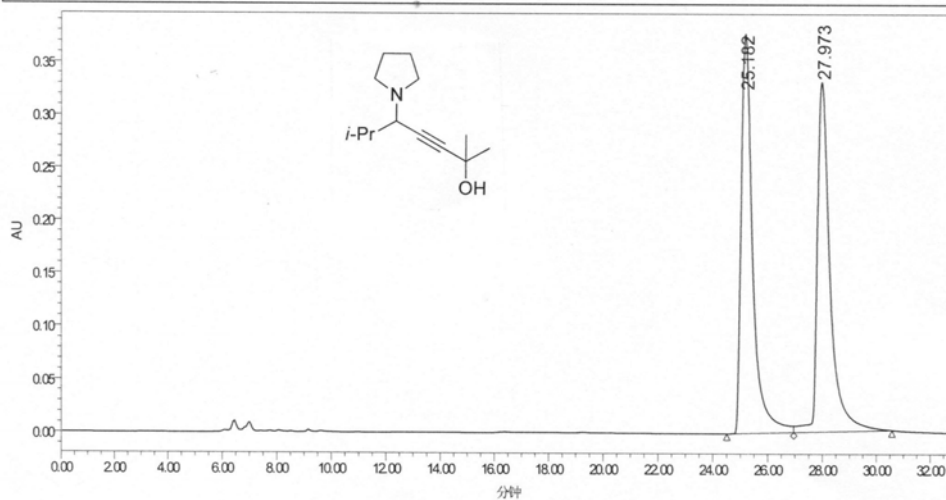

|   | RT<br>(min) | Area<br>(msec) | %Area | Height<br>(m) | %<br>Height |
|---|-------------|----------------|-------|---------------|-------------|
| 1 | 25.182      | 10998546       | 50.23 | 377434        | 53.32       |
| 2 | 27.973      | 10897558       | 49.77 | 330405        | 46.68       |

Report Method: 未知

Page: 1 (共计 1)

Printed: 2012/12/19

16:35:44 FFC

中国科学院上海有机化学研究所

Project Name: defaults for copy  
Reported by User: Breeze user (Breeze)

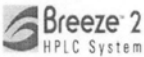

SAMPLE INFORMATION

|                   |                             |                  |                         |
|-------------------|-----------------------------|------------------|-------------------------|
| Sample Name:      | fw-5-112-ad-h-100-1-0.5-214 | Acquired By:     | Breeze                  |
| Sample Type:      | 未知                          | Date Acquired:   | 2012/12/19 15:10:51 CST |
| Vial:             | 1                           | Acq. Method:     | zg100                   |
| Injection #:      | 19                          | Date Processed:  | 2012/12/19 15:44:25 CST |
| Injection Volume: | 10.00 ul                    | Channel Name:    | V2489 CHA               |
| Run Time:         | 32.00 Minutes               | Sample Set Name: |                         |

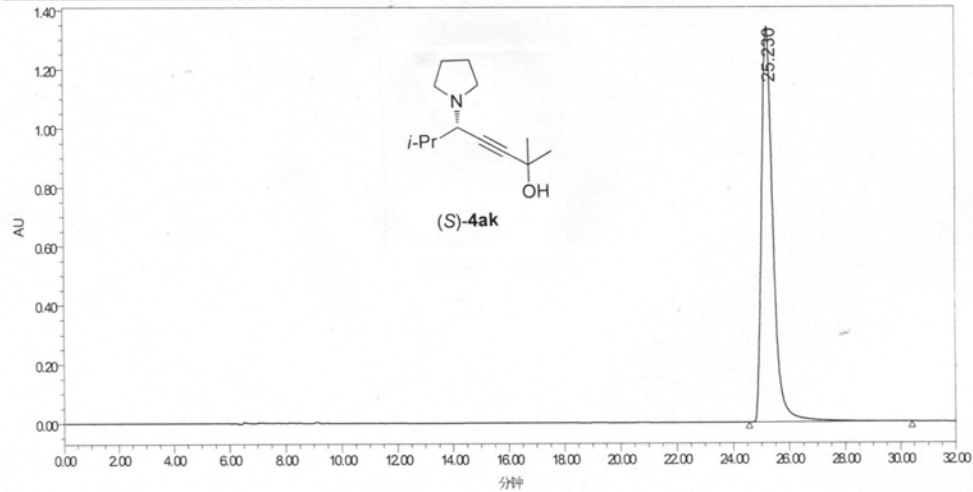

|   | RT<br>(min) | Area<br>(msec) | %Area  | Height<br>(msec) | %<br>Height |
|---|-------------|----------------|--------|------------------|-------------|
| 1 | 25.230      | 38105934       | 100.00 | 1343578          | 100.00      |

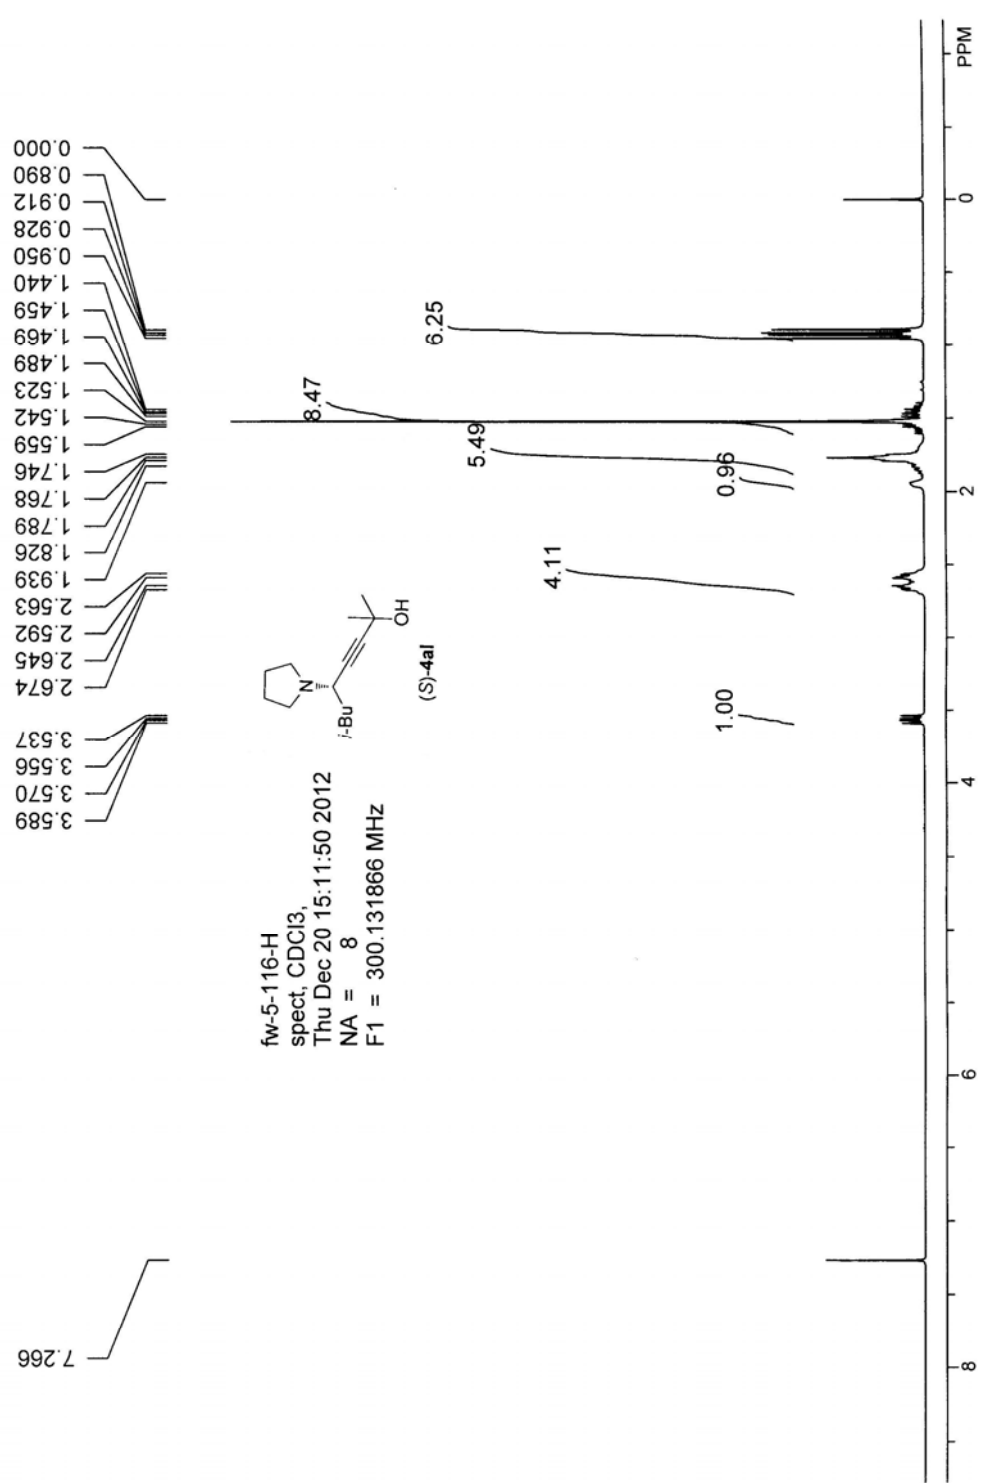

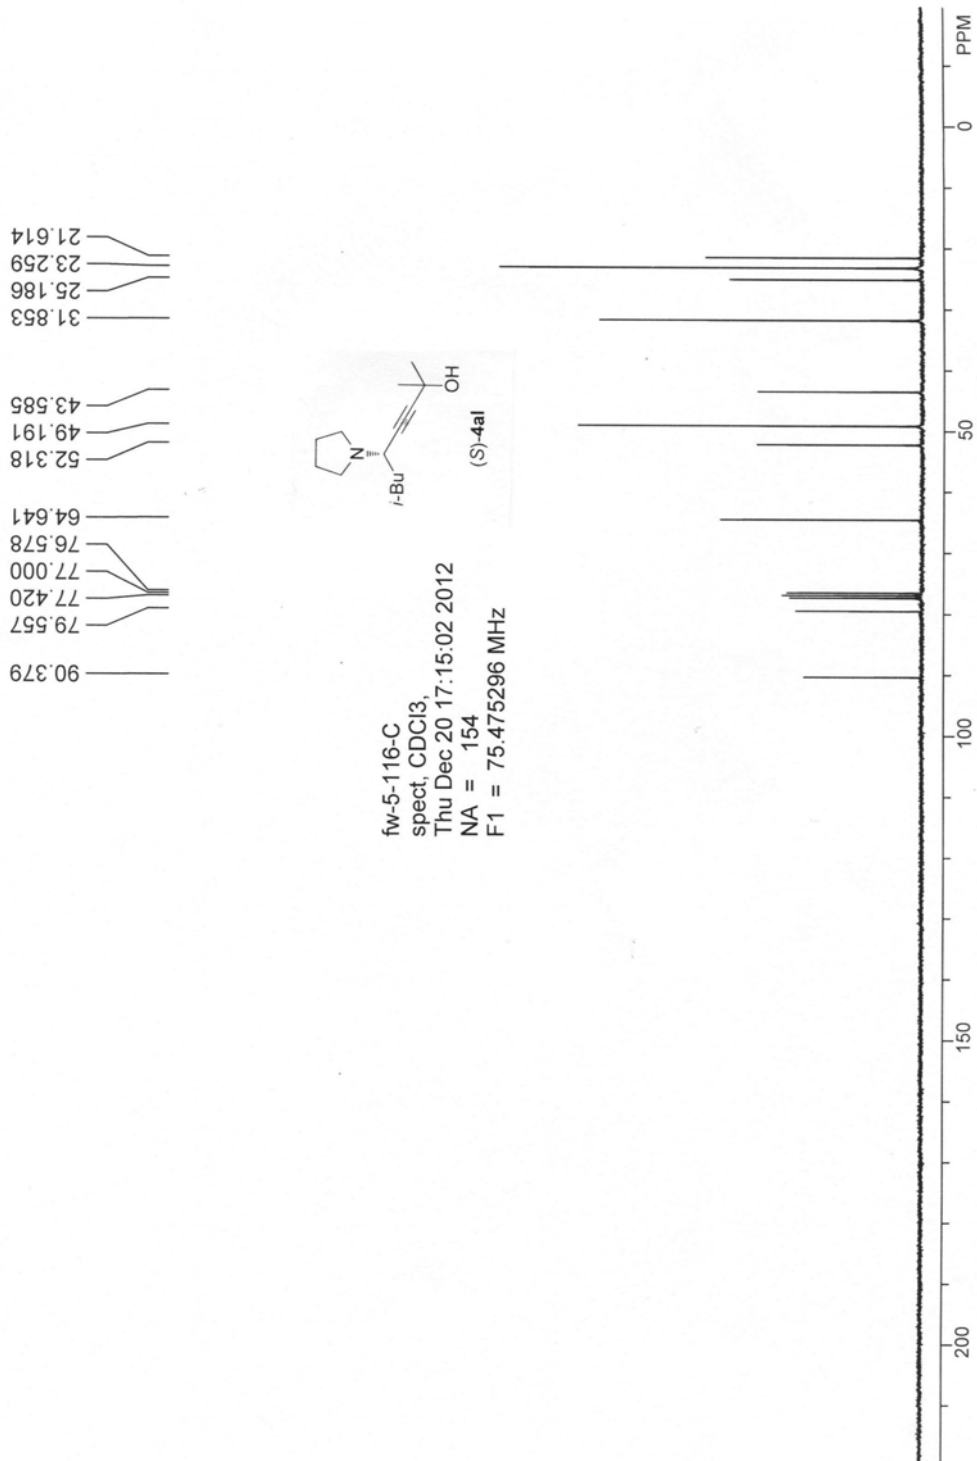

fw-5-116-C  
spect, CDCl3,  
Thu Dec 20 17:15:02 2012  
NA = 154  
F1 = 75.475296 MHz

中国科学院上海有机化学研究所

Project Name: defaults for copy  
Reported by User: Breeze user (Breeze)

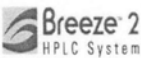

SAMPLE INFORMATION

|                   |                             |                  |                         |
|-------------------|-----------------------------|------------------|-------------------------|
| Sample Name:      | fw-5-114-ad-h-100-1-0.5-214 | Acquired By:     | Breeze                  |
| Sample Type:      | 未知                          | Date Acquired:   | 2012/12/21 9:48:36 CST  |
| Vial:             | 1                           | Acq. Method:     | zgj100                  |
| Injection #:      | 40                          | Date Processed:  | 2012/12/21 10:16:22 CST |
| Injection Volume: | 10.00 uL                    | Channel Name:    | V2489 ChA               |
| Run Time:         | 200.00 Minutes              | Sample Set Name: |                         |

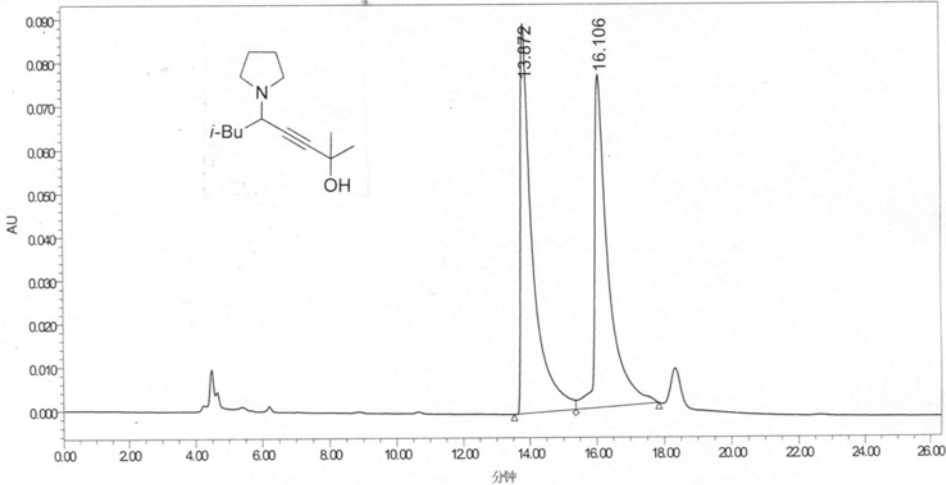

|   | RT<br>(min) | Area<br>(mVsec) | %Area | Height<br>(mV) | %<br>Height |
|---|-------------|-----------------|-------|----------------|-------------|
| 1 | 13.872      | 2232401         | 50.87 | 89768          | 53.92       |
| 2 | 16.106      | 2156279         | 49.13 | 76700          | 46.08       |

中国科学院上海有机化学研究所

Project Name: defaults for copy  
Reported by User: Breeze user (Breeze)

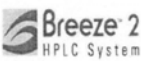

SAMPLE INFORMATION

|                   |                             |                  |                         |
|-------------------|-----------------------------|------------------|-------------------------|
| Sample Name:      | fw-5-116-ad-h-100-1-0.5-214 | Acquired By:     | Breeze                  |
| Sample Type:      | 标准                          | Date Acquired:   | 2012/12/21 17:07:48 CST |
| Vial:             | 1                           | Acq. Method:     | zg100                   |
| Injection #:      | 50                          | Date Processed:  | 2012/12/24 15:39:39 CST |
| Injection Volume: | 10.00 uL                    | Channel Name:    | V2489 ChA               |
| Run Time:         | 200.00 Minutes              | Sample Set Name: |                         |

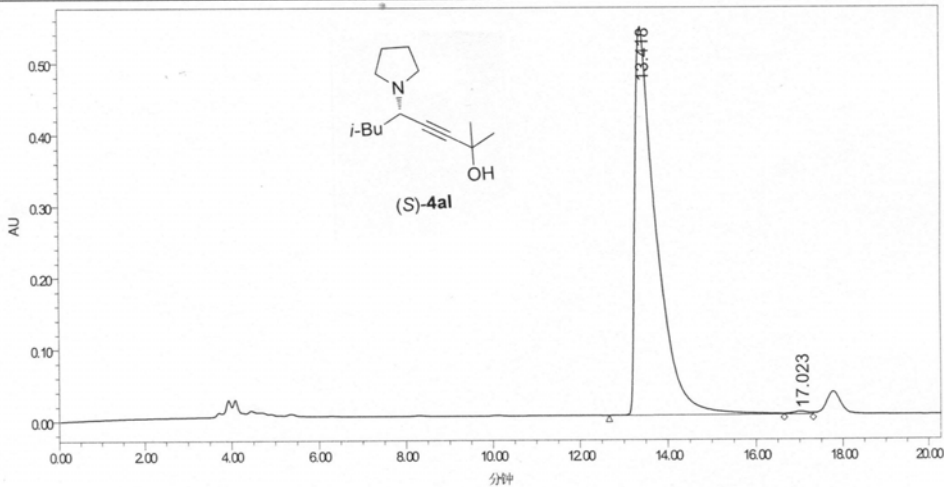

|   | RT<br>(min) | Area<br>(#sec) | %Area | Height<br>(#) | %<br>Height |
|---|-------------|----------------|-------|---------------|-------------|
| 1 | 13.418      | 18123621       | 99.47 | 542895        | 99.31       |
| 2 | 17.023      | 96281          | 0.53  | 3783          | 0.69        |

Report Method: 标准  
Page: 1 (共计 1)

Printed: 2012/12/24  
15:42:23 FRC

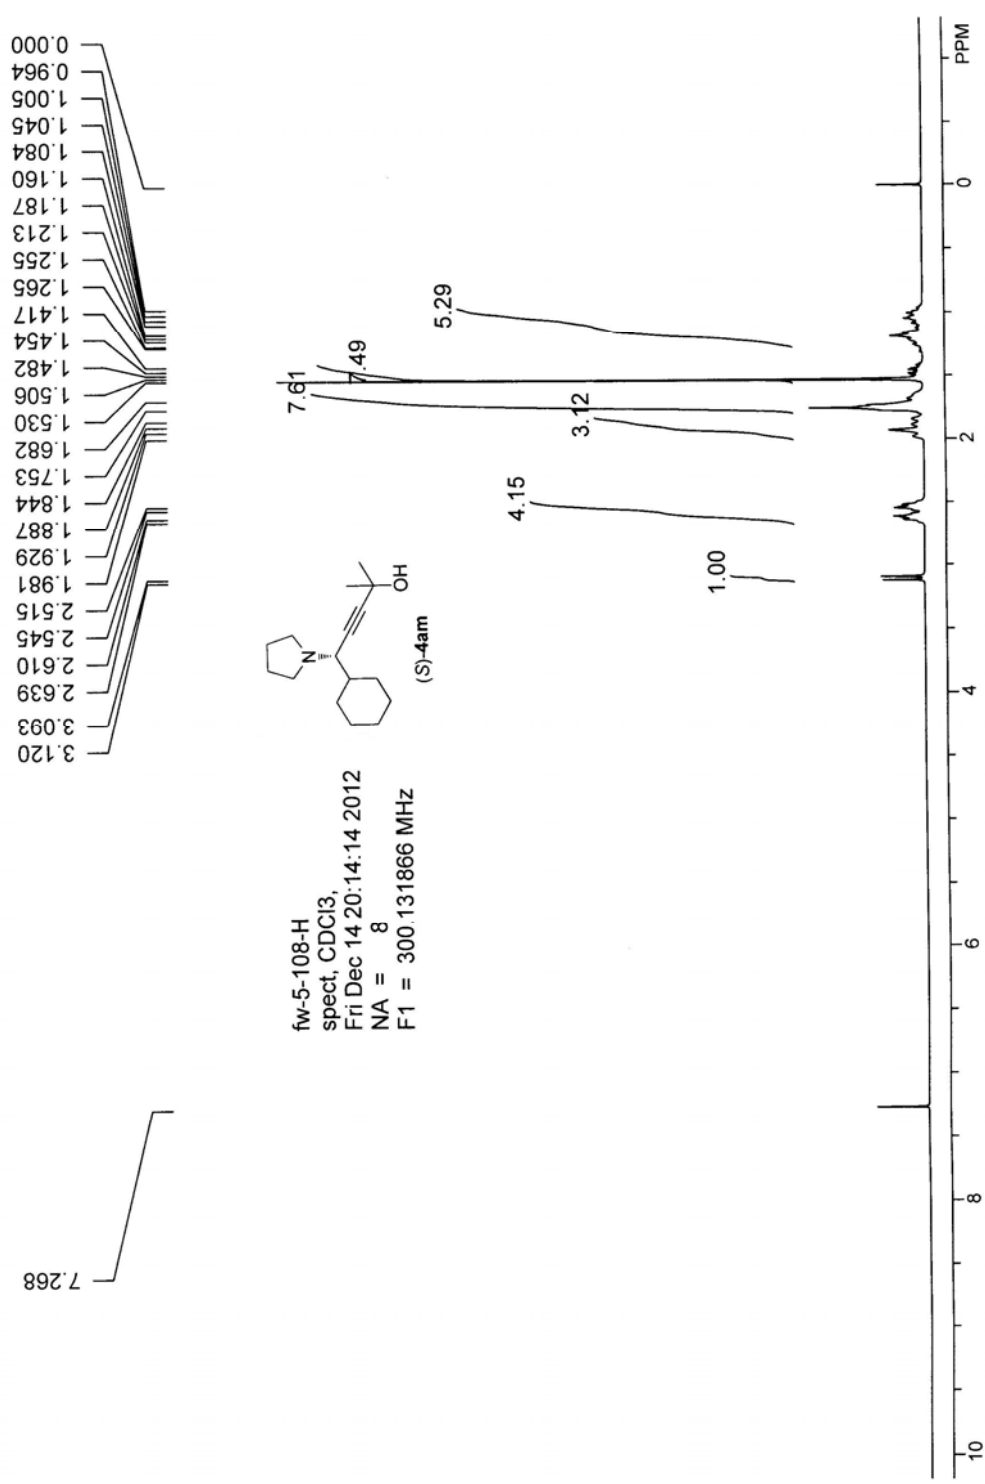

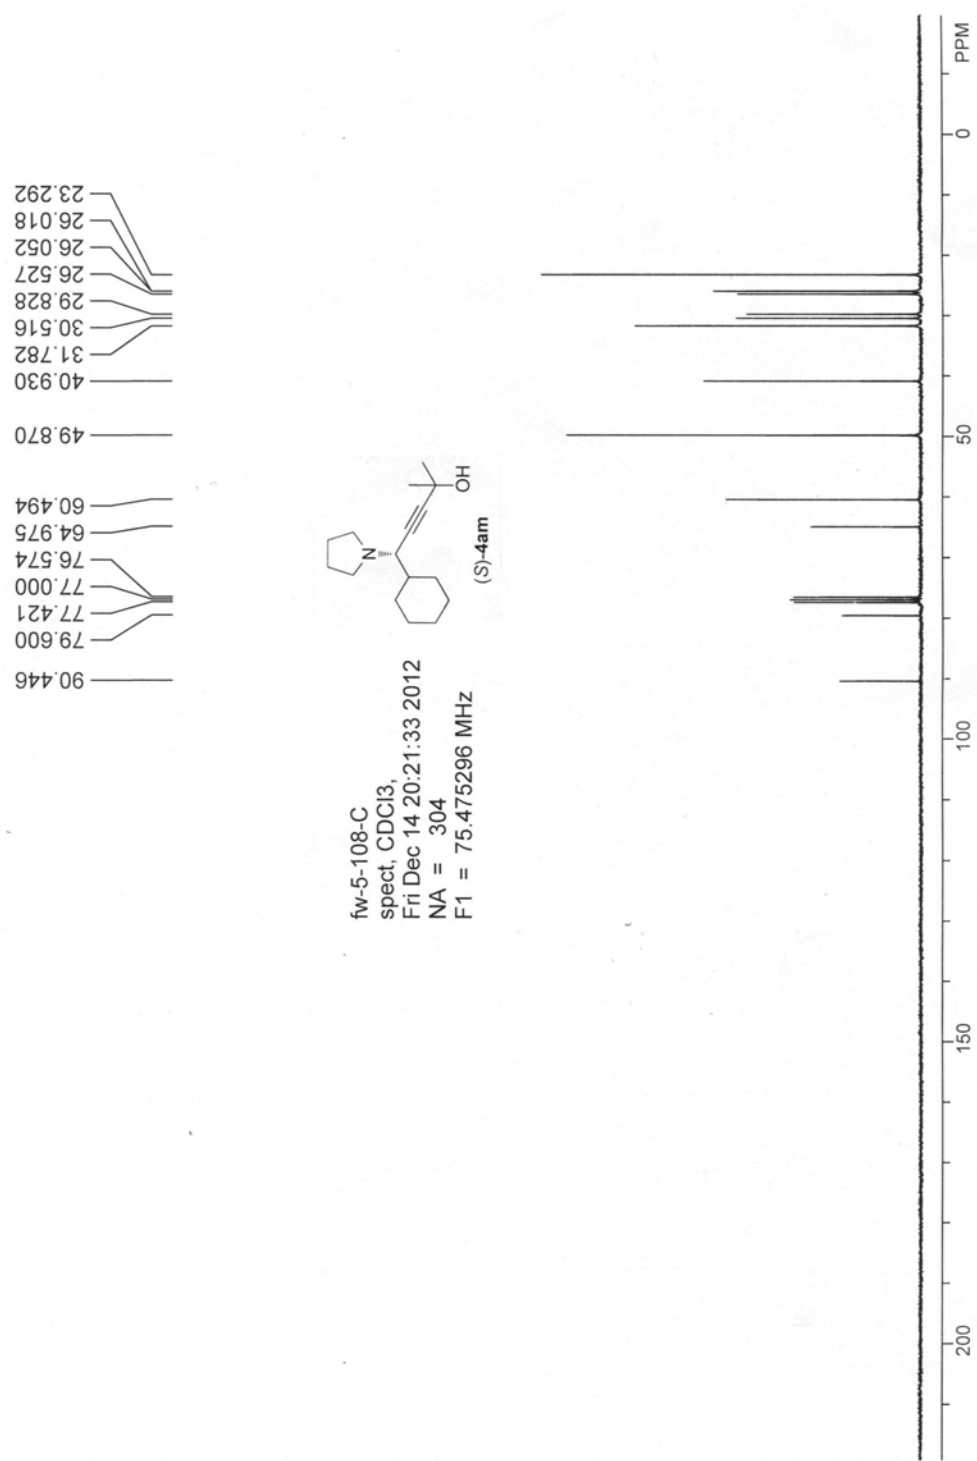



fw-5-104-od-h-200-1-1-214

实验时间: 2012-12-14, 10:22:38  
谱图文件: D:\zhuguangjiong\fw\20121214\fw-5-104-od-h-200-1-1-214. .org  
报告时间: 2012-12-14, 10:43:41

实验内容简介:  
od-h 200+1  
1ml/min 214nm

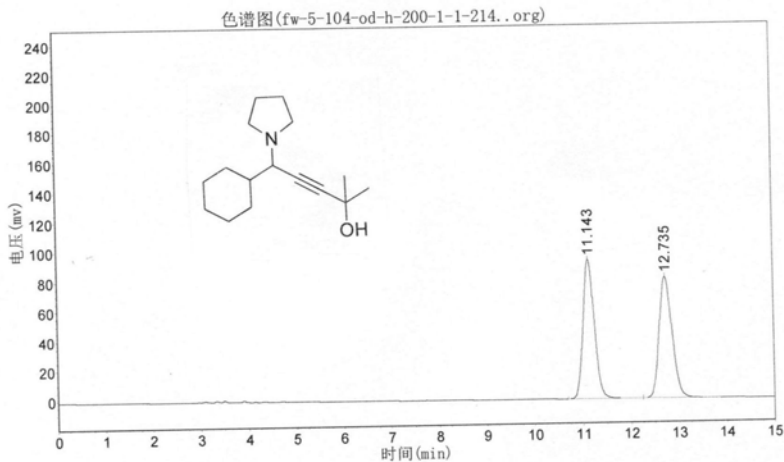

分析结果表

| 峰号 | 峰名 | 保留时间   | 峰高         | 峰面积         | 含量       |
|----|----|--------|------------|-------------|----------|
| 1  |    | 11.143 | 94284.344  | 1546297.500 | 49.9827  |
| 2  |    | 12.735 | 82211.430  | 1547370.375 | 50.0173  |
| 总计 |    |        | 176495.773 | 3093667.875 | 100.0000 |

fw-5-108-od-h-200-1-1-214

实验时间: 2012-12-14, 14:29:01 报告时间: 2012-12-14, 14:47:24  
谱图文件:D:\zhuguangjiong\fw\20121214\fw-5-108-od-h-200-1-1-214...org

实验内容简介:  
od-h 200+1  
1ml/min 214nm

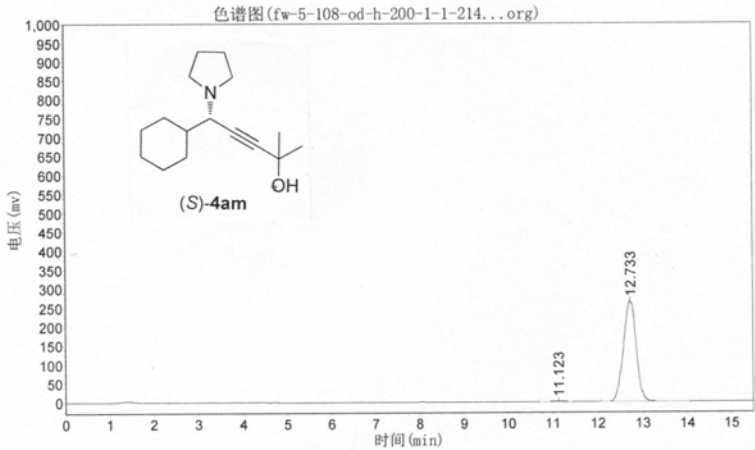

分析结果表

| 峰号 | 峰名 | 保留时间   | 峰高         | 峰面积         | 含量       |
|----|----|--------|------------|-------------|----------|
| 1  |    | 11.123 | 2729.848   | 48206.609   | 0.8999   |
| 2  |    | 12.733 | 266271.781 | 5308485.500 | 99.1001  |
| 总计 |    |        | 269001.629 | 5356692.109 | 100.0000 |

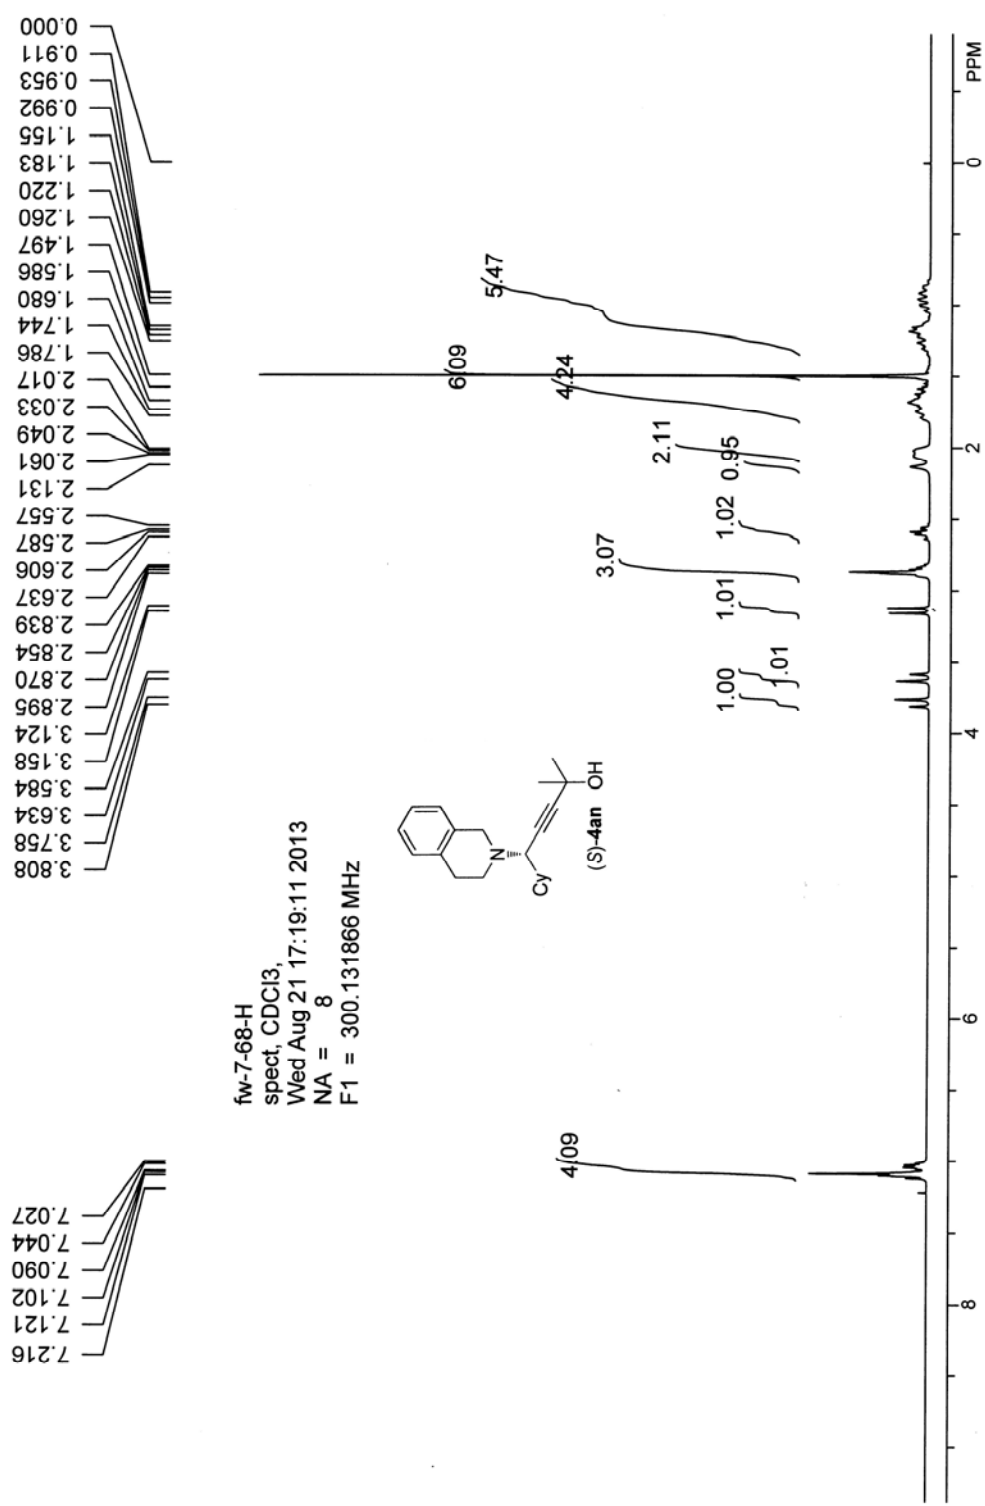

fw-768-H  
spect, CDCl3,  
Wed Aug 21 17:19:11 2013  
NA = 8  
F1 = 300.131866 MHz

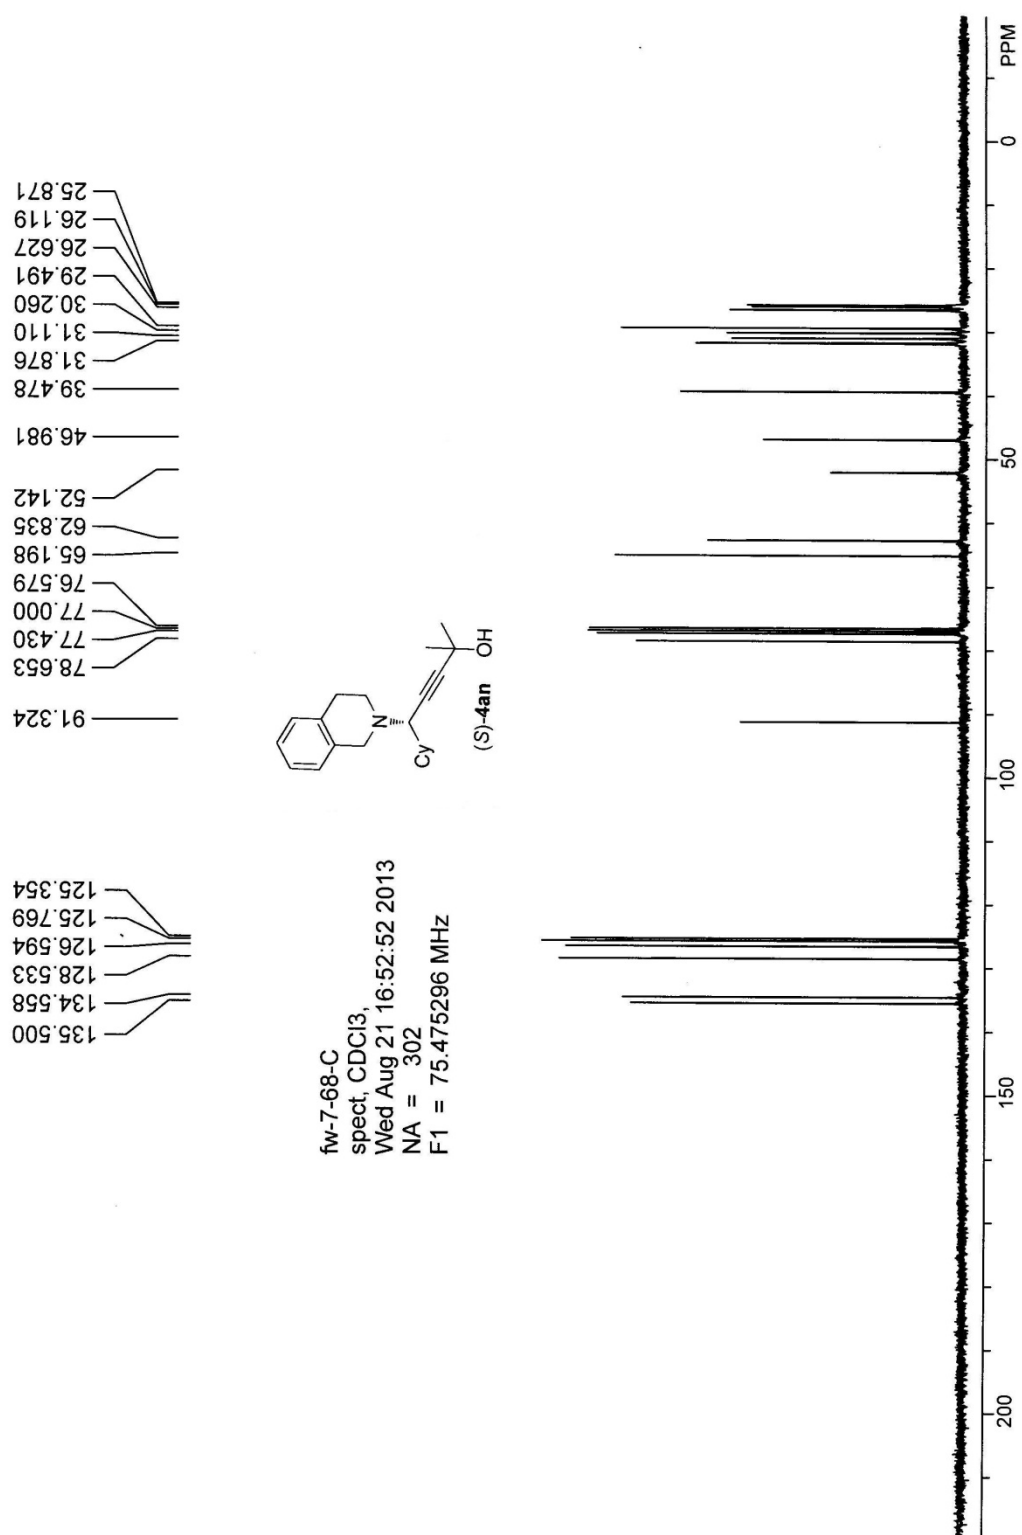

fw-7-67-od-h-95-5-0.8-214

实验时间: 2013/8/22, 10:32:45  
谱图文件:D:\zhuguangjiong\fw\20130822\fw-7-67-od-h-95-5-0.8-214.org  
报告时间: 2013/8/22, 11:52:34

实验内容简介:  
od-h 95/5  
0.8ml/min 214nm

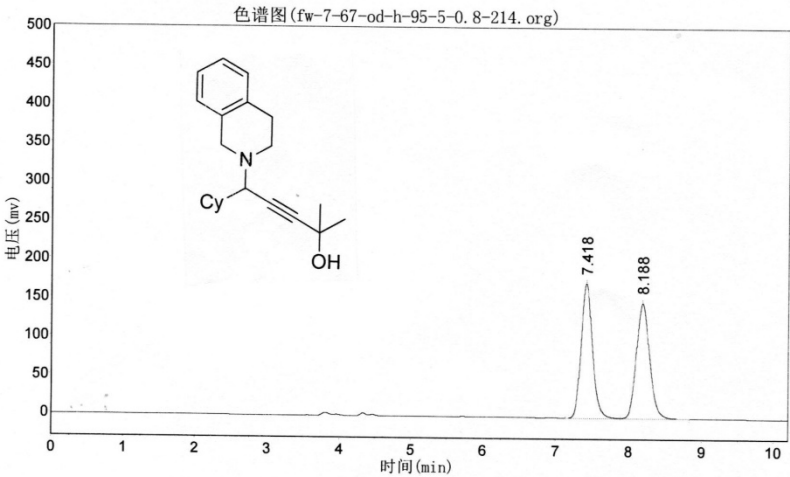

分析结果表

| 峰号 | 峰名 | 保留时间  | 峰高         | 峰面积         | 含量       |
|----|----|-------|------------|-------------|----------|
| 1  |    | 7.418 | 173770.641 | 1890239.375 | 49.9620  |
| 2  |    | 8.188 | 148811.766 | 1893115.375 | 50.0380  |
| 总计 |    |       | 322582.406 | 3783354.750 | 100.0000 |

fw-7-68-od-h-95-5-0.8-214

实验时间: 2013/8/22, 11:27:56      报告时间: 2013/8/22, 11:55:00  
谱图文件: D:\zhuguangjiong\fw\20130822\fw-7-68-od-h-95-5-0.8-214..org

实验内容简介:  
od-h 95/5  
0.8ml/min 214nm

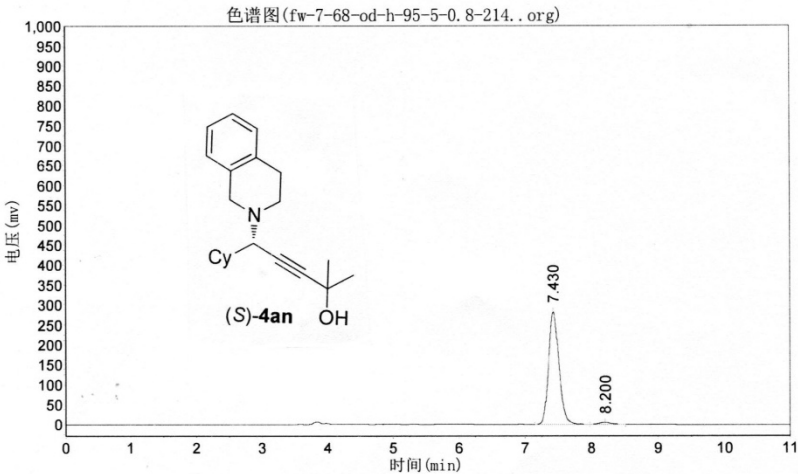

分析结果表

| 峰号 | 峰名 | 保留时间  | 峰高         | 峰面积         | 含量       |
|----|----|-------|------------|-------------|----------|
| 1  |    | 7.430 | 281848.375 | 3076208.250 | 97.9001  |
| 2  |    | 8.200 | 5064.616   | 65983.859   | 2.0999   |
| 总计 |    |       | 286912.991 | 3142192.109 | 100.0000 |

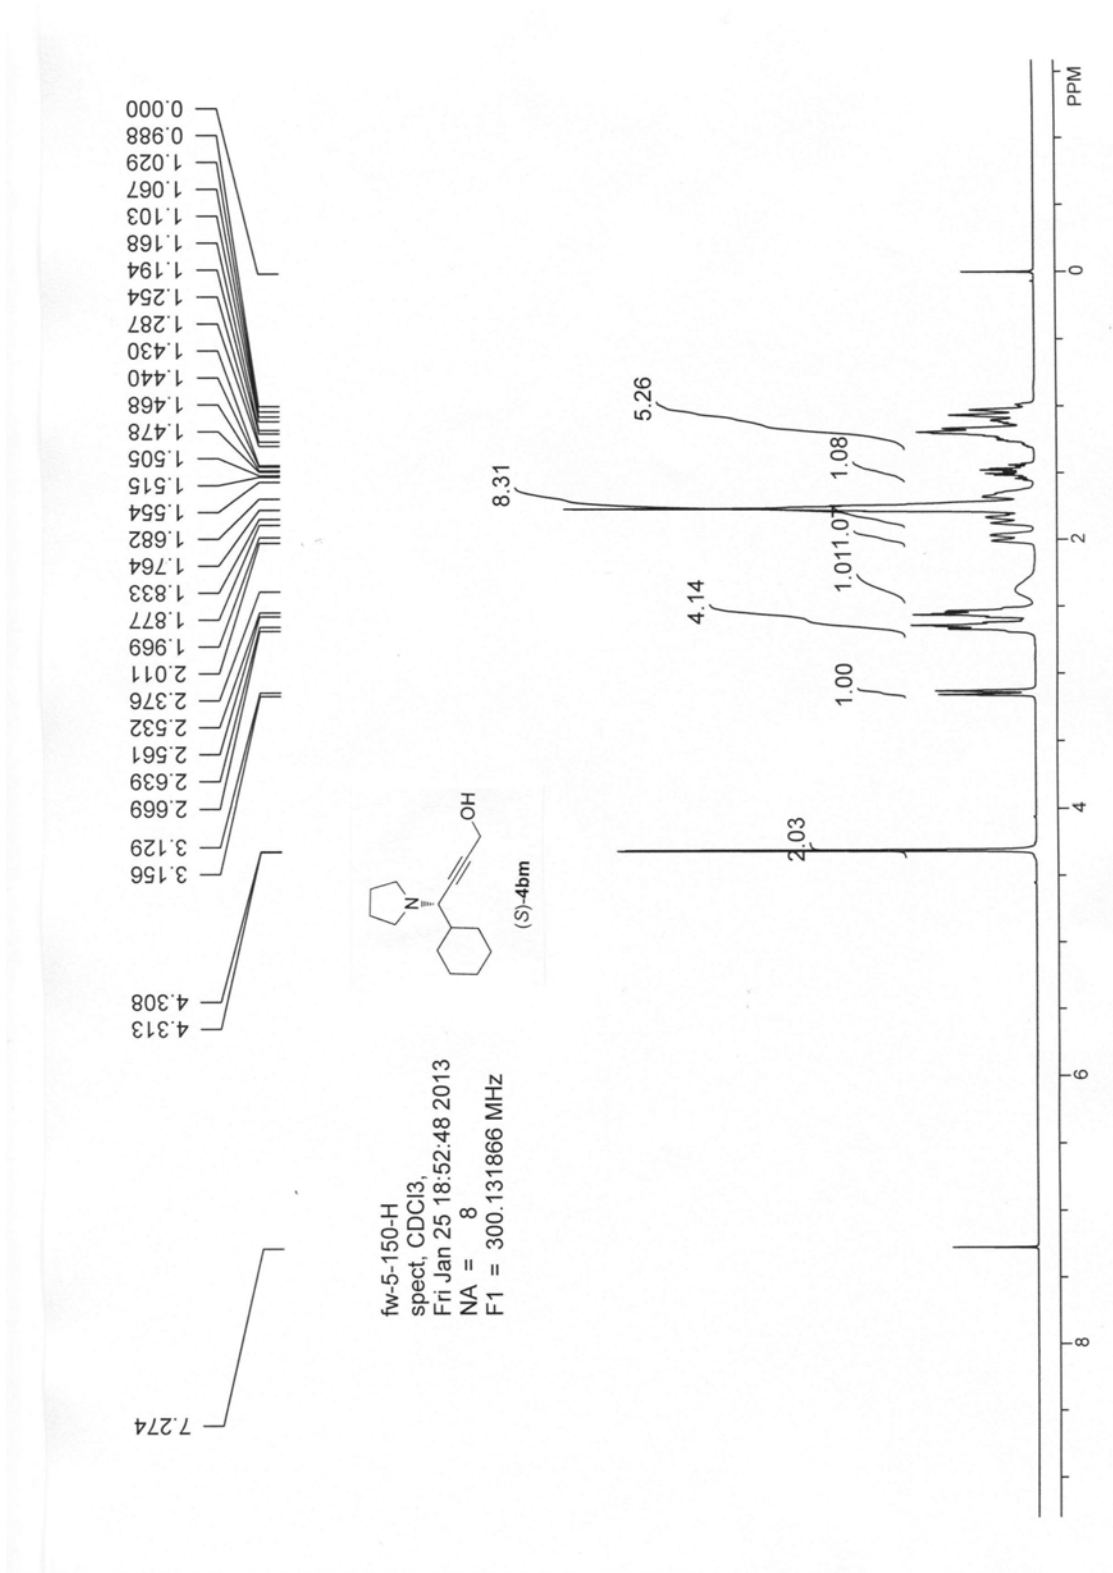

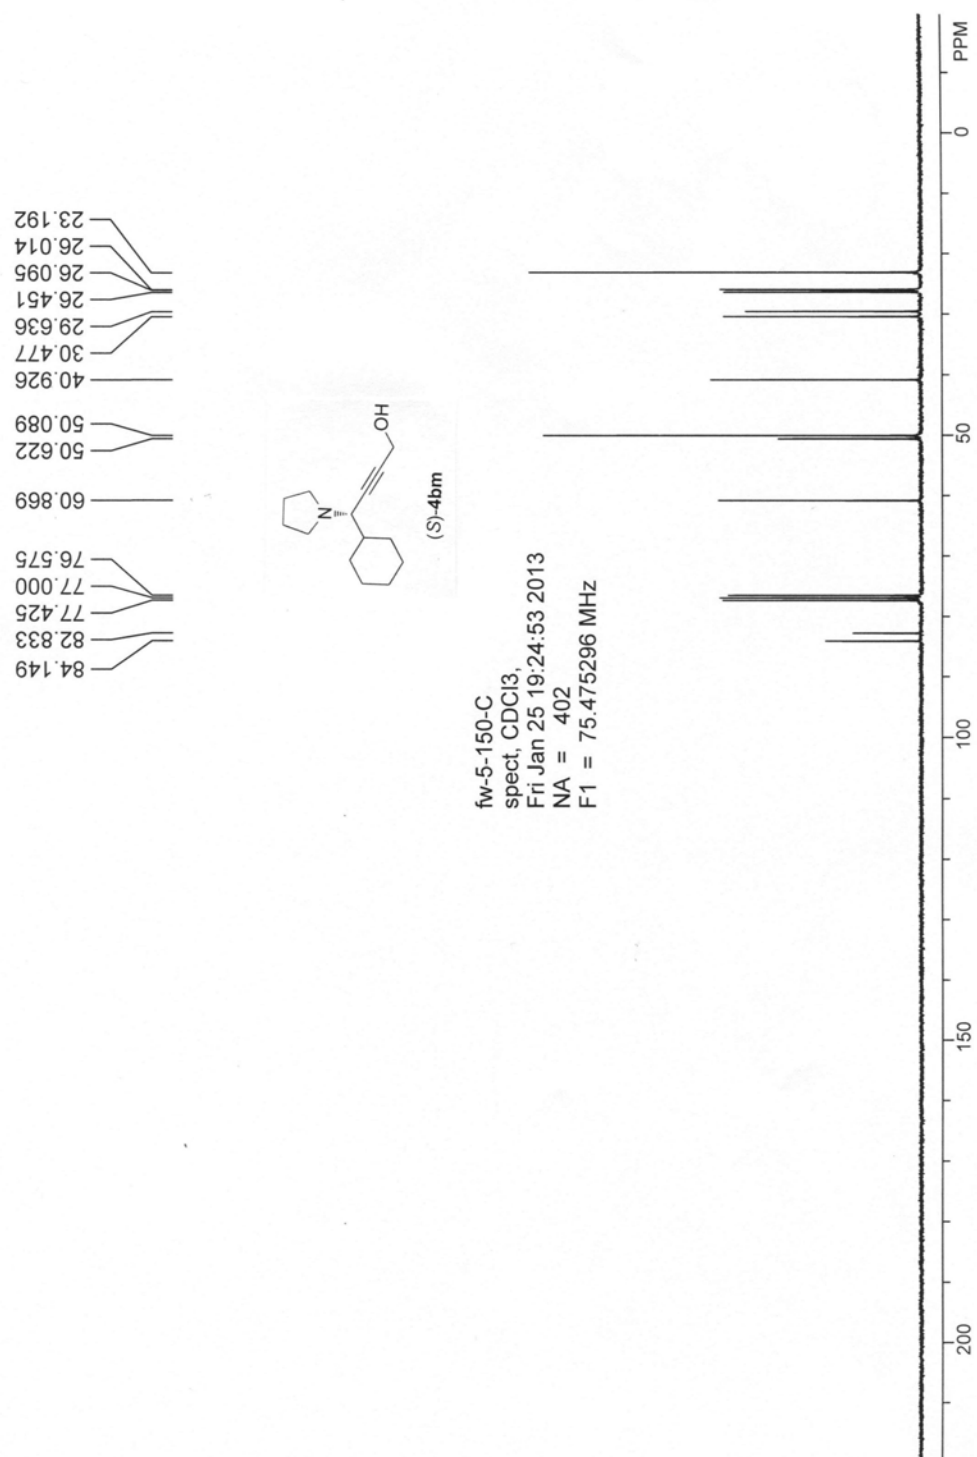



中国科学院上海有机化学研究所

Project Name: defaults for copy  
Reported by User: Breeze user (Breeze)

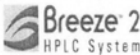

| SAMPLE INFORMATION |                             |                  |                        |
|--------------------|-----------------------------|------------------|------------------------|
| Sample Name:       | fw-5-132-ad-h-90-10-0.7-214 | Acquired By:     | Breeze                 |
| Sample Type:       | 未知                          | Date Acquired:   | 2013/1/15 10:09:53 CST |
| Vial:              | 1                           | Acq. Method:     | zg90                   |
| Injection #:       | 5                           | Date Processed:  | 2013/1/15 10:27:49 CST |
| Injection Volume:  | 10.00 uL                    | Channel Name:    | V0489 CHA              |
| Run Time:          | 200.00 Minutes              | Sample Set Name: |                        |

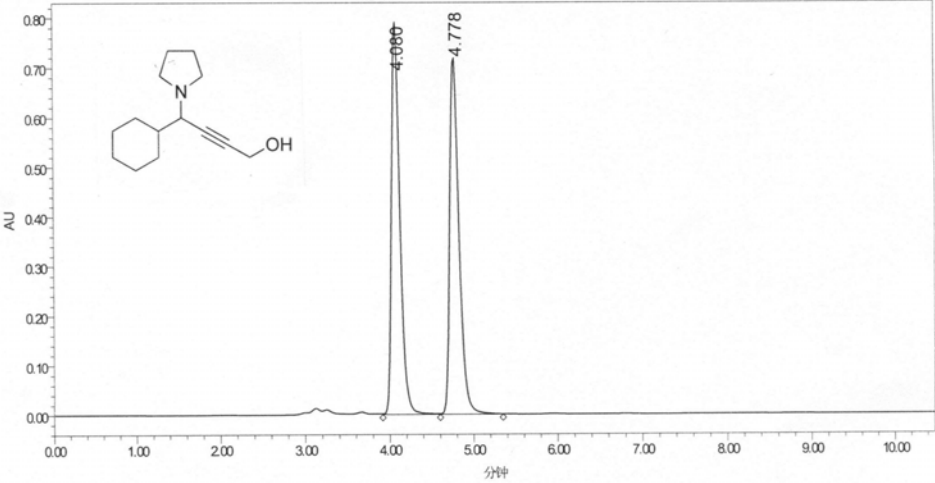

|   | RT<br>(min) | Area<br>(#sec) | %Area | Height<br>(#) | %<br>Height |
|---|-------------|----------------|-------|---------------|-------------|
| 1 | 4.080       | 5480428        | 49.71 | 788702        | 52.26       |
| 2 | 4.778       | 5543712        | 50.29 | 720461        | 47.74       |

中国科学院上海有机化学研究所

Project Name: defaults for copy

Reported by User: Breeze user (Breeze)

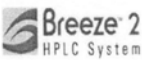

SAMPLE INFORMATION

|                   |                             |                  |                        |
|-------------------|-----------------------------|------------------|------------------------|
| Sample Name:      | fw-5-150-ad-h-90-10-0.7-214 | Acquired By:     | Breeze                 |
| Sample Type:      | 未知                          | Date Acquired:   | 2013/1/15 9:21:13 CST  |
| Vial:             | 1                           | Acq. Method:     | zg90                   |
| Injection #:      | 2                           | Date Processed:  | 2013/1/15 10:28:21 CST |
| Injection Volume: | 10.00 ul                    | Channel Name:    | V2489 ChA              |
| Run Time:         | 200.00 Minutes              | Sample Set Name: |                        |

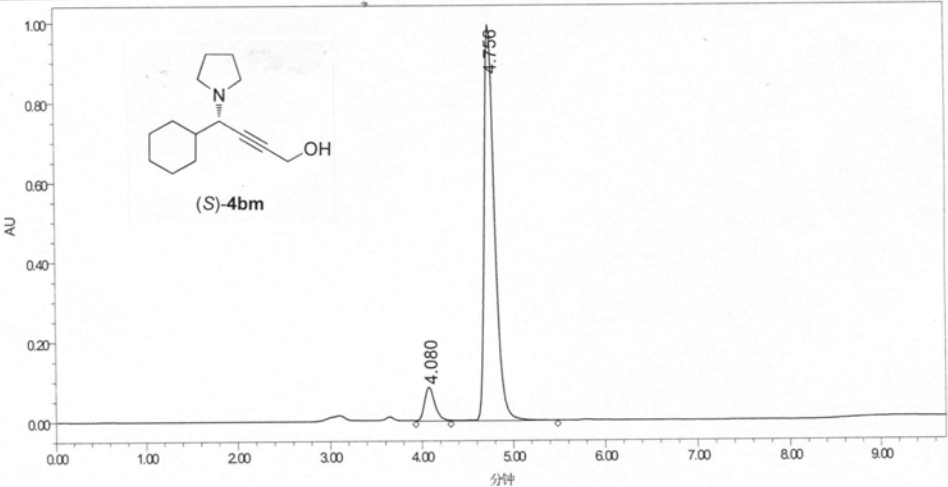

|   | RT<br>(min) | Area<br>(msec) | %Area | Height<br>(m) | %<br>Height |
|---|-------------|----------------|-------|---------------|-------------|
| 1 | 4.080       | 664896         | 7.81  | 84009         | 7.79        |
| 2 | 4.756       | 7860811        | 92.19 | 994006        | 92.21       |

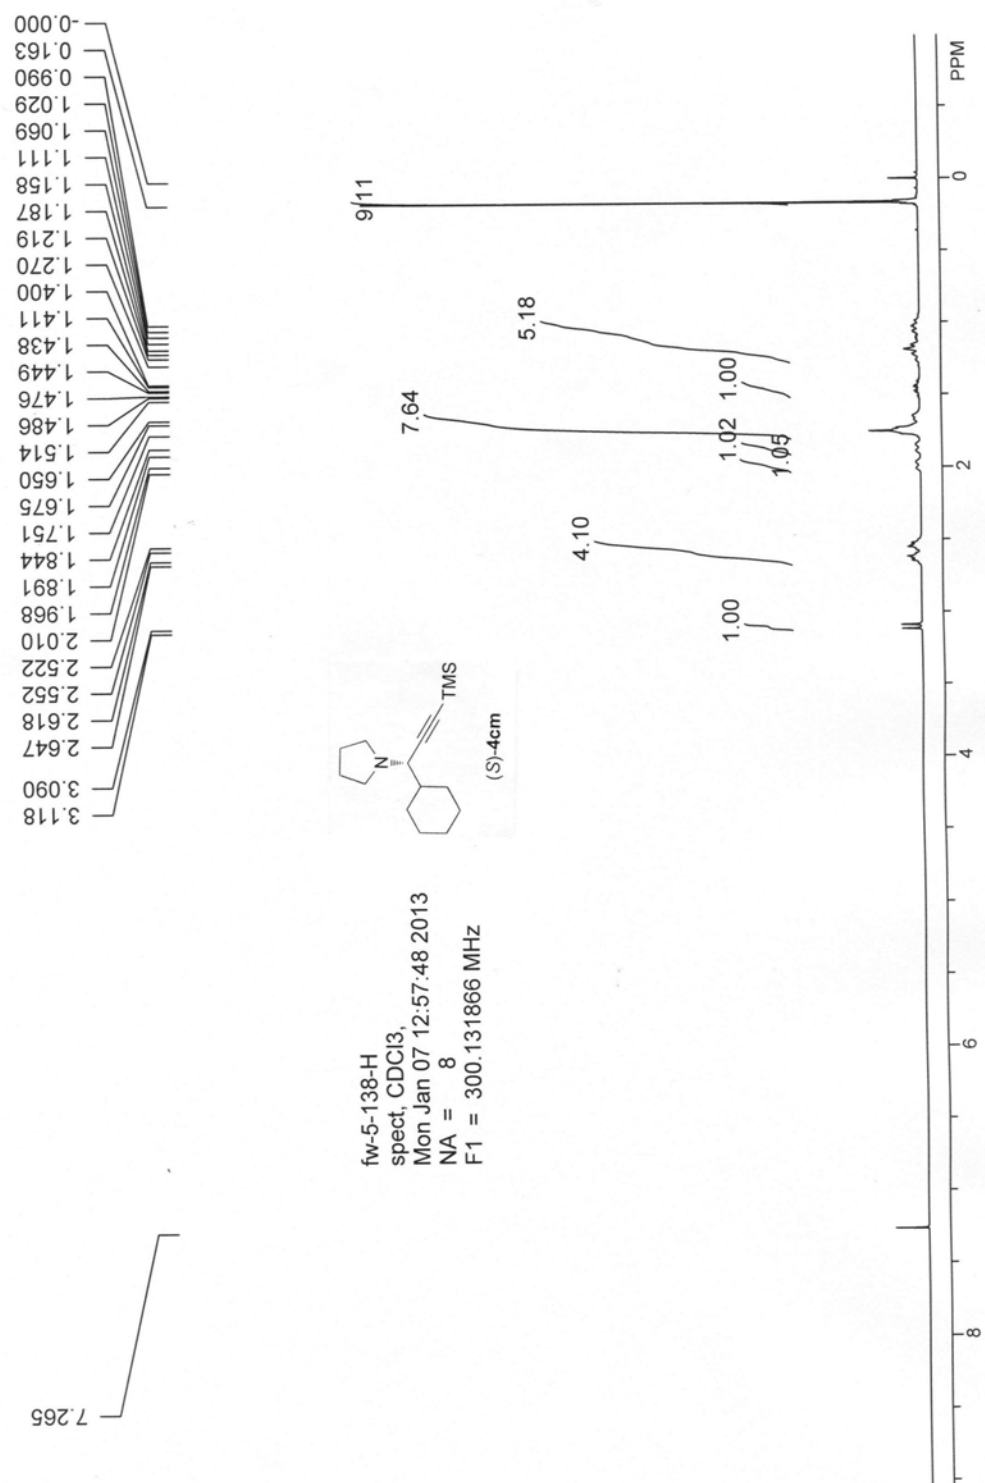

fw-5-138-H  
spect, CDCl3,  
Mon Jan 07 12:57:48 2013  
NA = 8  
F1 = 300.131866 MHz

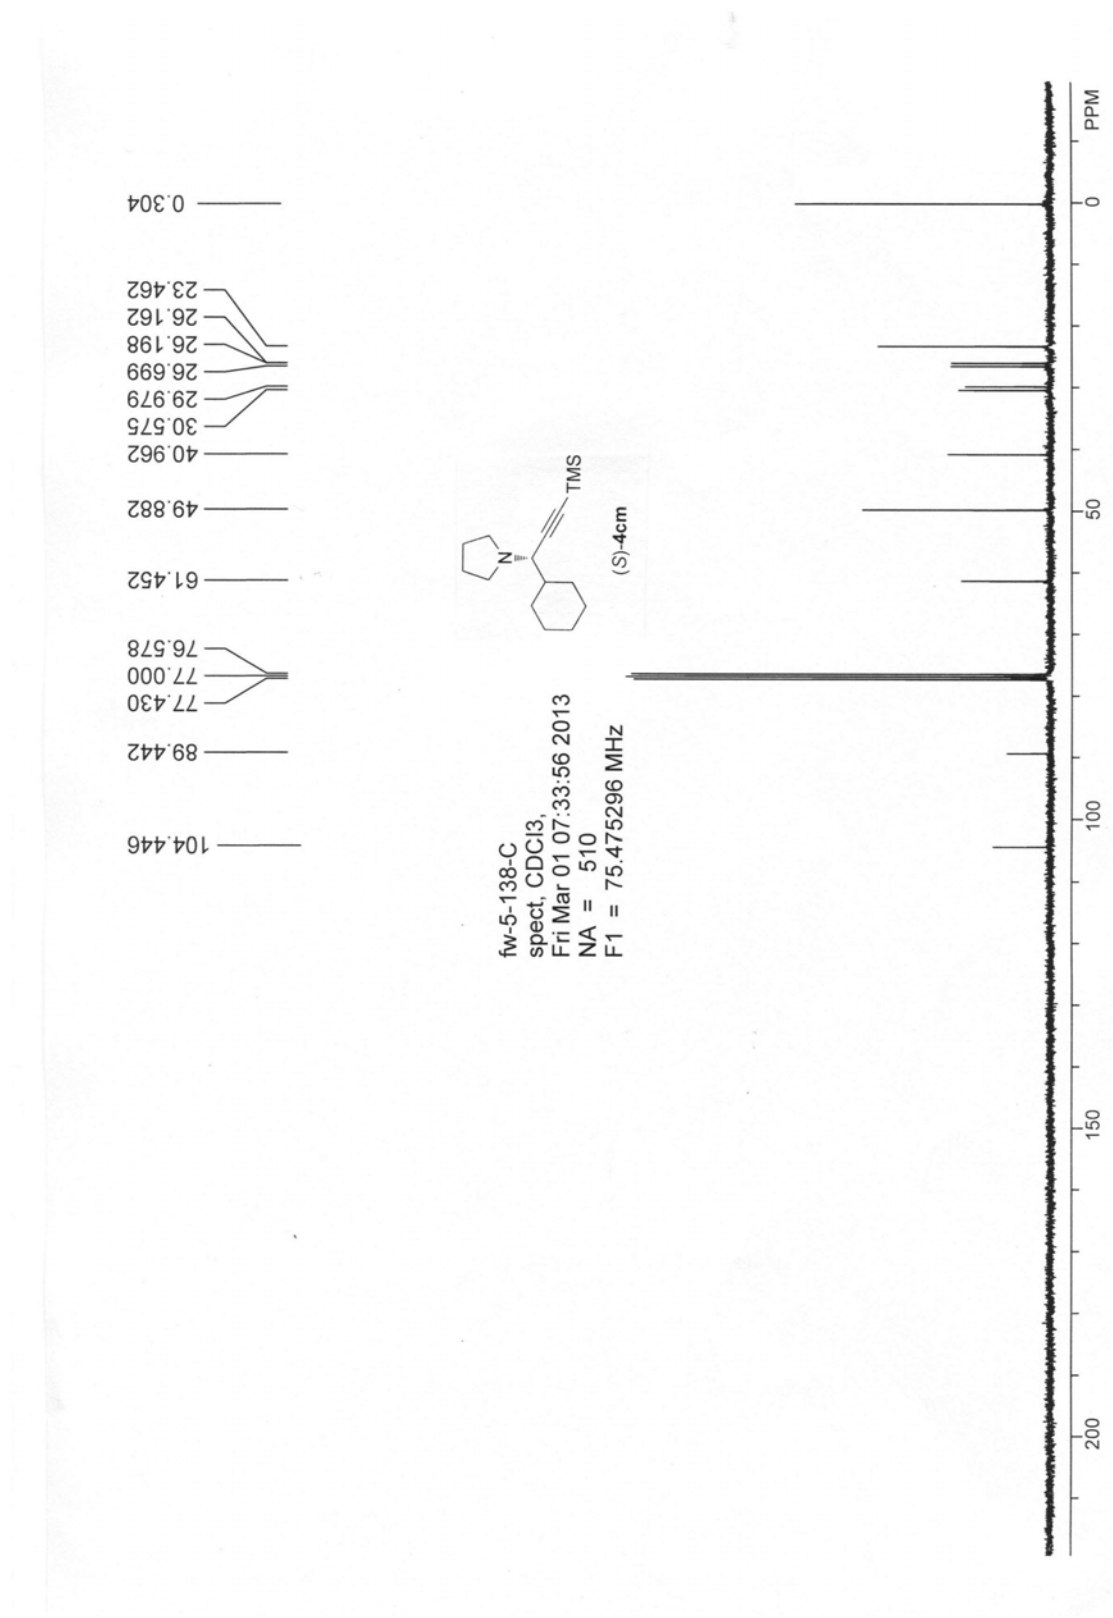

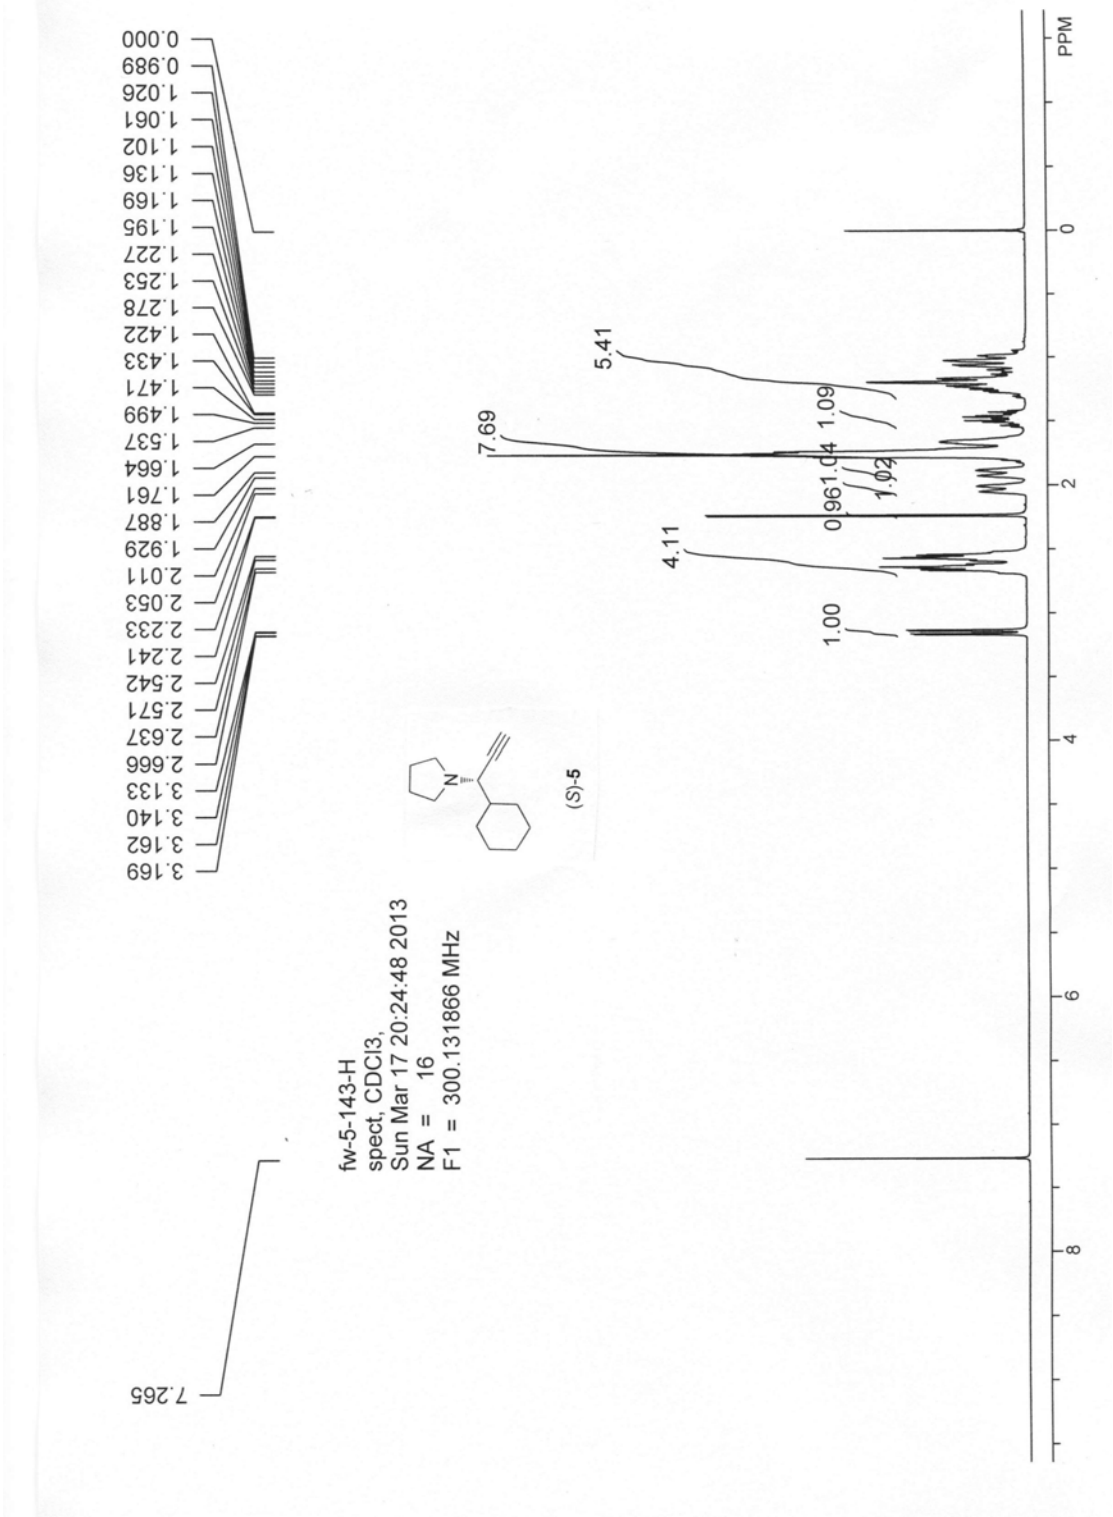

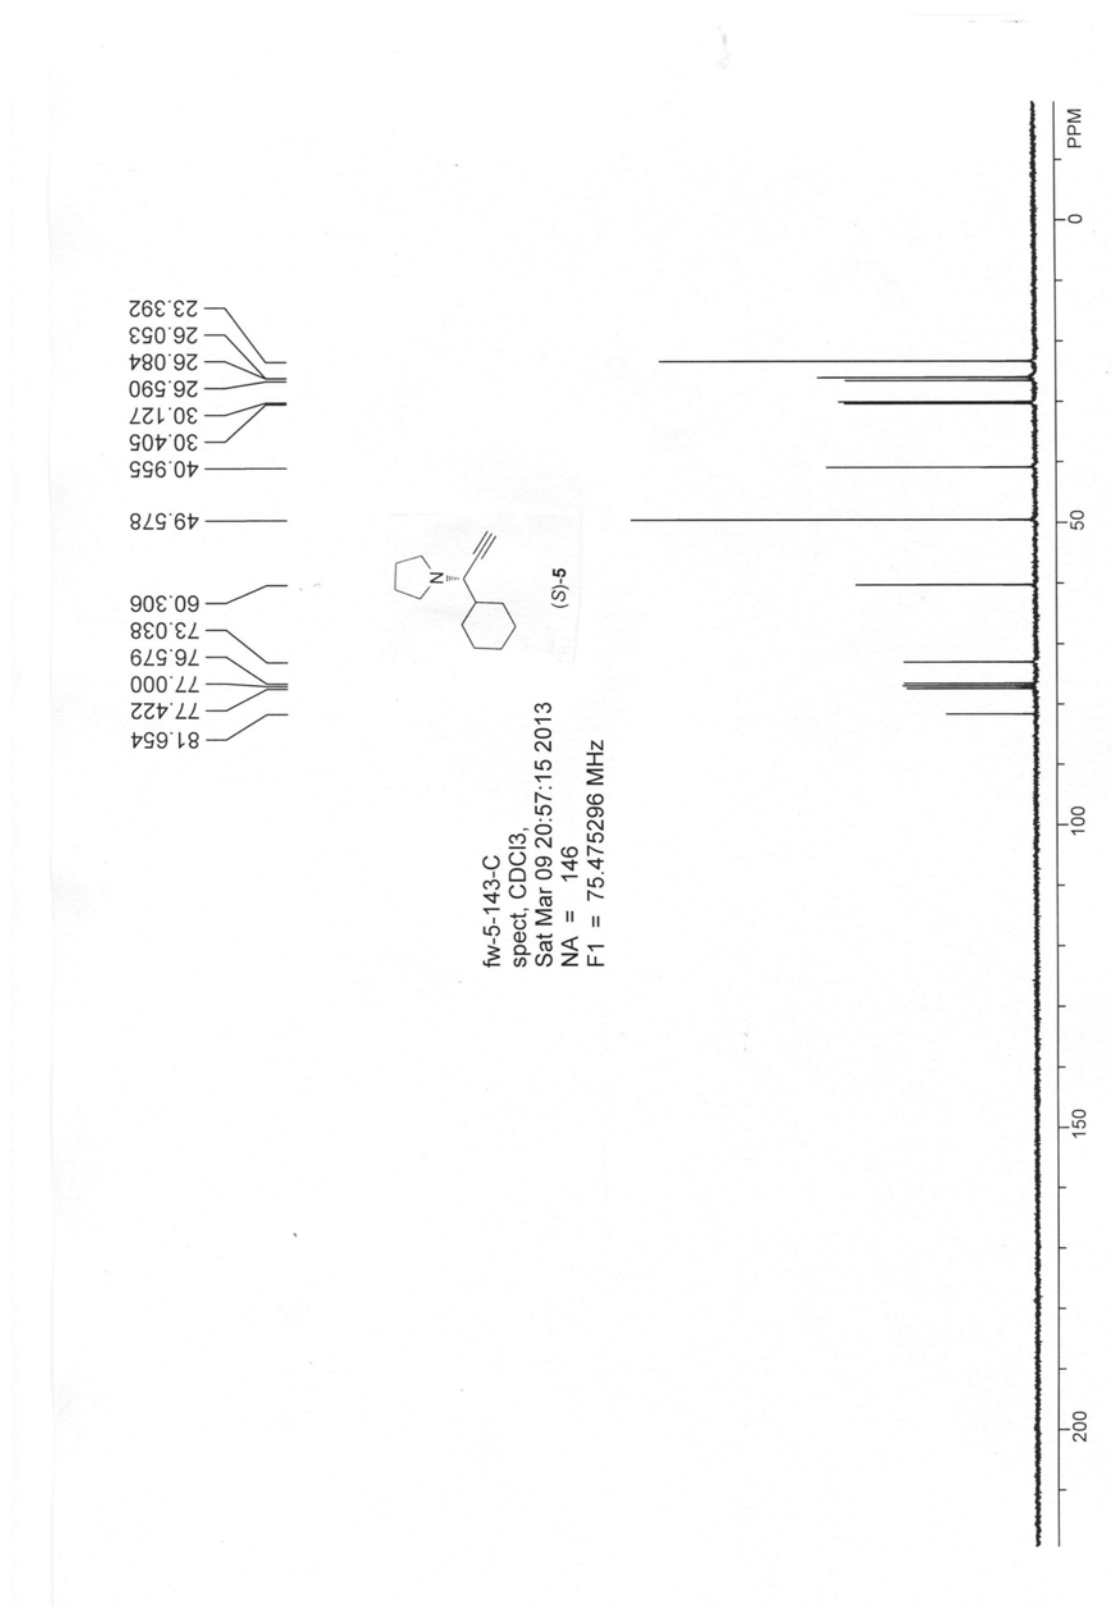

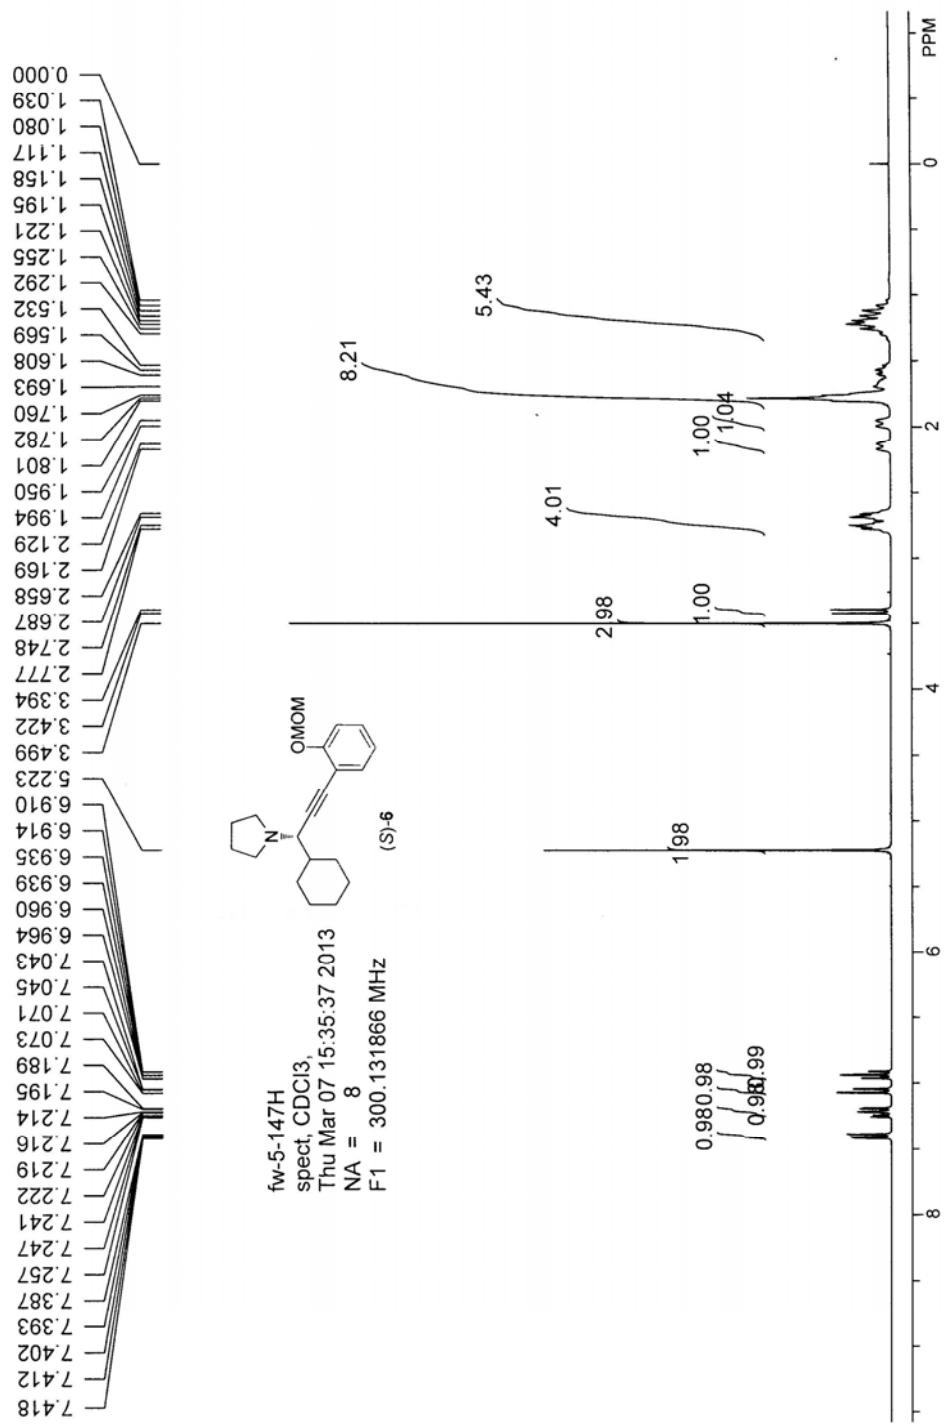



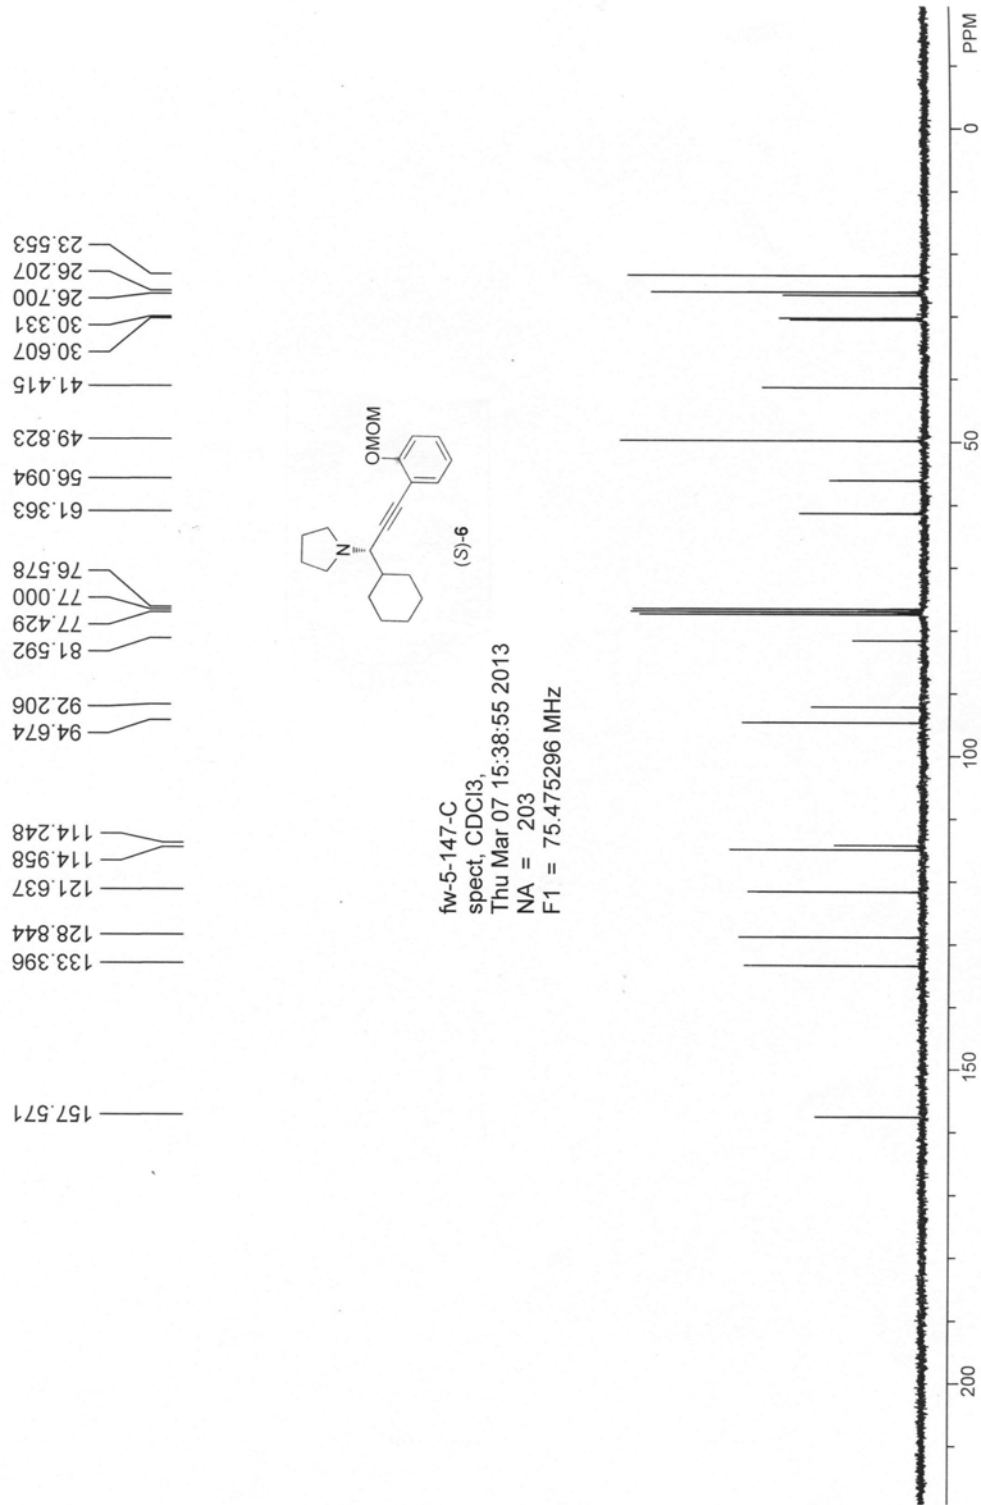



Operator: dell Timebase: U-3000 Sequence: LSH

Page 1-1  
2013-3-7 5:45 下午

**296 fw-5-34-od-h-400-1-0.7-220**

|                  |                            |                   |          |
|------------------|----------------------------|-------------------|----------|
| Sample Name:     | fw-5-34-od-h-400-1-0.7-220 | Injection Volume: | 20.0     |
| Vial Number:     | 295                        | Channel:          | UV_VIS_1 |
| Sample Type:     | unknown                    | Wavelength:       | 220      |
| Control Program: | test                       | Bandwidth:        | n.a.     |
| Quantif. Method: | test                       | Dilution Factor:  | 1.0000   |
| Recording Time:  | 2013-1-11 21:18            | Sample Weight:    | 1.0000   |
| Run Time (min):  | 16.31                      | Sample Amount:    | 1.0000   |

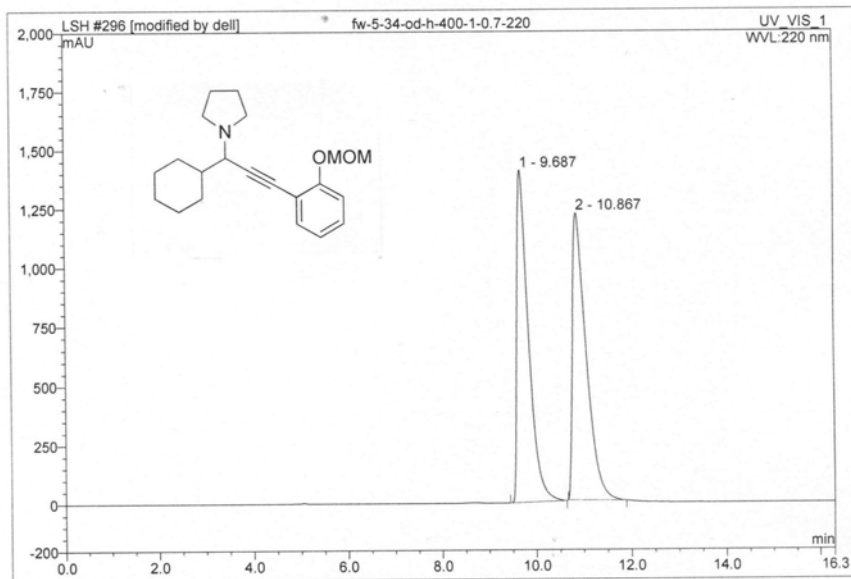

| No.    | Ret. Time<br>min | Peak Name | Height<br>mAU | Area<br>mAU*min | Rel. Area<br>% | Amount | Type |
|--------|------------------|-----------|---------------|-----------------|----------------|--------|------|
| 1      | 9.69             | n.a.      | 1406.715      | 398.179         | 49.65          | n.a.   | BMB* |
| 2      | 10.87            | n.a.      | 1212.516      | 403.854         | 50.35          | n.a.   | BMB* |
| Total: |                  |           | 2619.231      | 802.033         | 100.00         | 0.000  |      |

default/Integration

Chromeleon (c) Dionex 1996-2006  
Version 6.80 SR5 Build 2413 (137116)

Operator: dell Timebase: U-3000 Sequence: LSH

Page 1-1  
2013-1-11 9:21 下午

|                                 |                             |                   |          |
|---------------------------------|-----------------------------|-------------------|----------|
| 295 fw-5-147-od-h-400-1-0.7-220 |                             |                   |          |
| Sample Name:                    | fw-5-147-od-h-400-1-0.7-220 | Injection Volume: | 20.0     |
| Vial Number:                    | 294                         | Channel:          | UV_VIS_1 |
| Sample Type:                    | unknown                     | Wavelength:       | 220      |
| Control Program:                | test                        | Bandwidth:        | n.a.     |
| Quantif. Method:                | test                        | Dilution Factor:  | 1.0000   |
| Recording Time:                 | 2013-1-11 21:01             | Sample Weight:    | 1.0000   |
| Run Time (min):                 | 16.41                       | Sample Amount:    | 1.0000   |

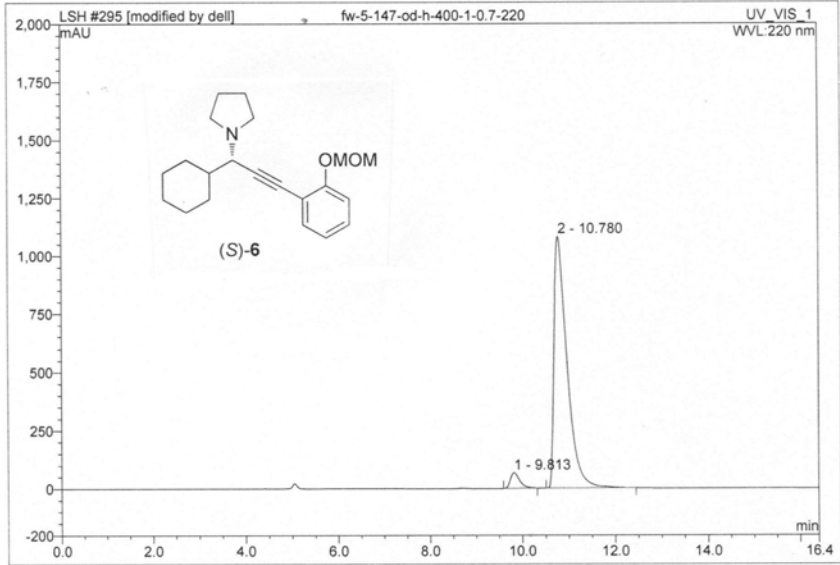

| No.    | Ret.Time<br>min | Peak Name | Height<br>mAU | Area<br>mAU*min | Rel.Area<br>% | Amount | Type |
|--------|-----------------|-----------|---------------|-----------------|---------------|--------|------|
| 1      | 9.81            | n.a.      | 67.615        | 15.600          | 4.30          | n.a.   | BMB* |
| 2      | 10.78           | n.a.      | 1081.705      | 347.254         | 95.70         | n.a.   | BMB* |
| Total: |                 |           | 1149.321      | 362.854         | 100.00        | 0.000  |      |

default/Integration

Chromeleon (c) Dionex 1996-2006  
Version 6.80 SR5 Build 2413 (137116)

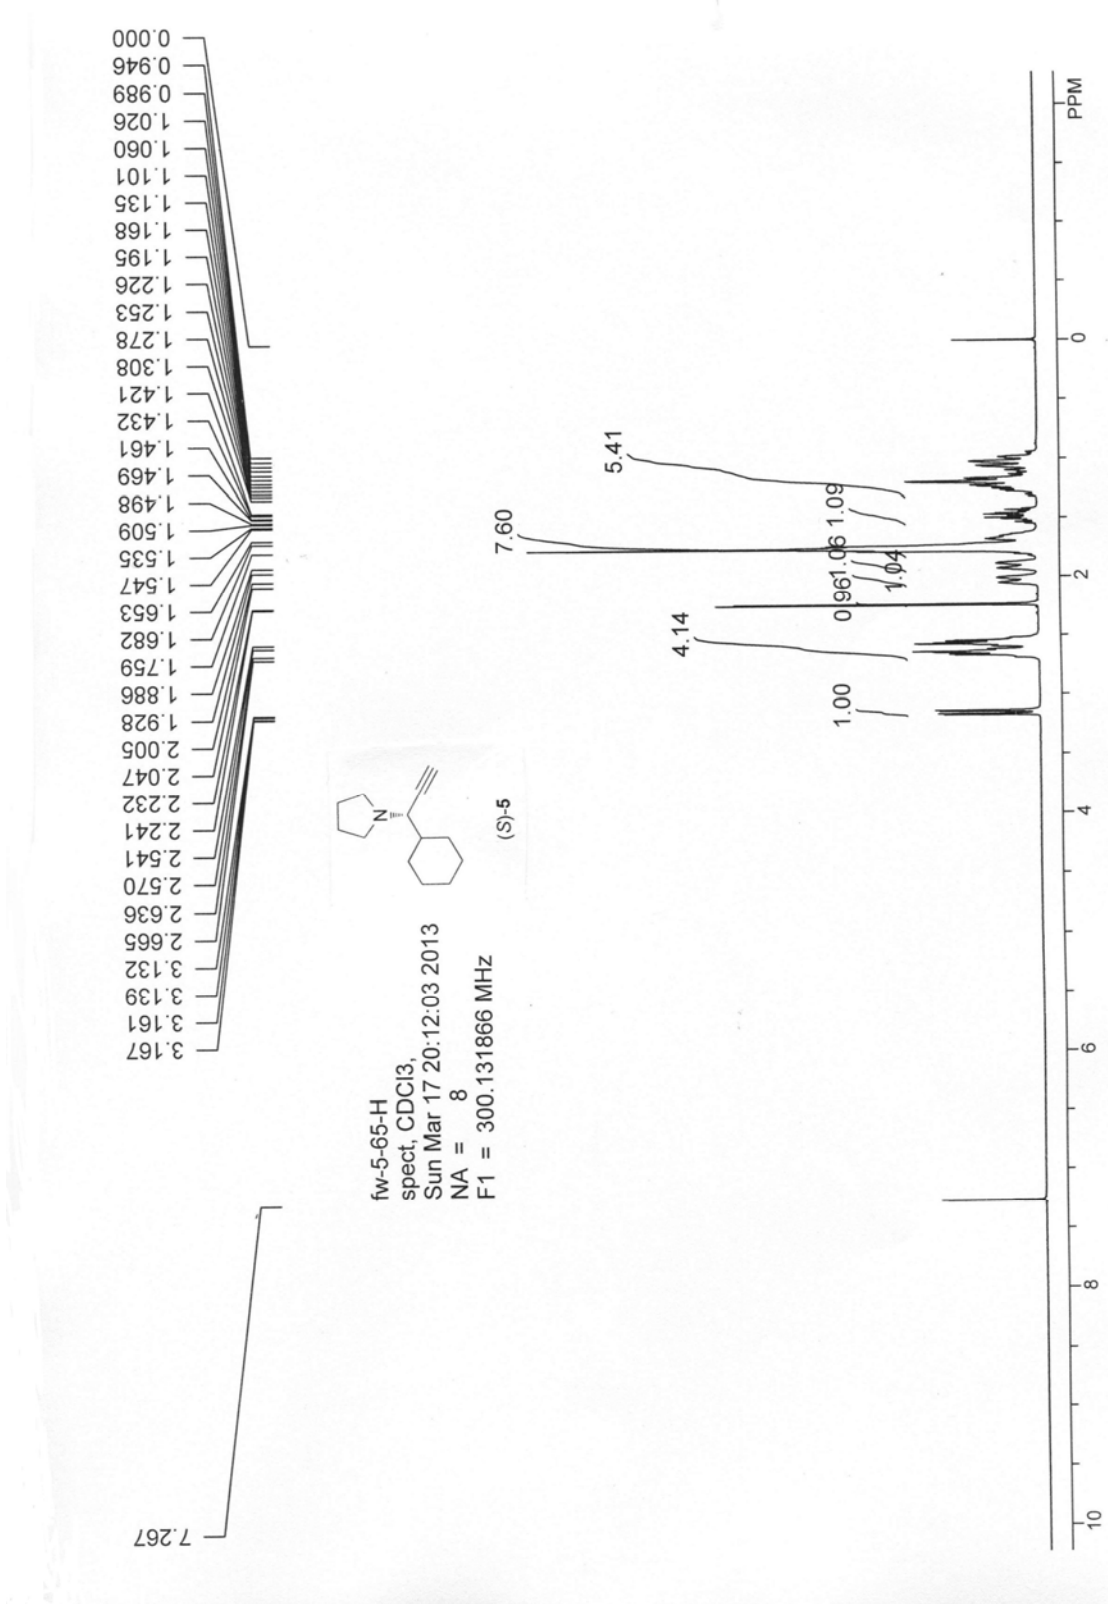

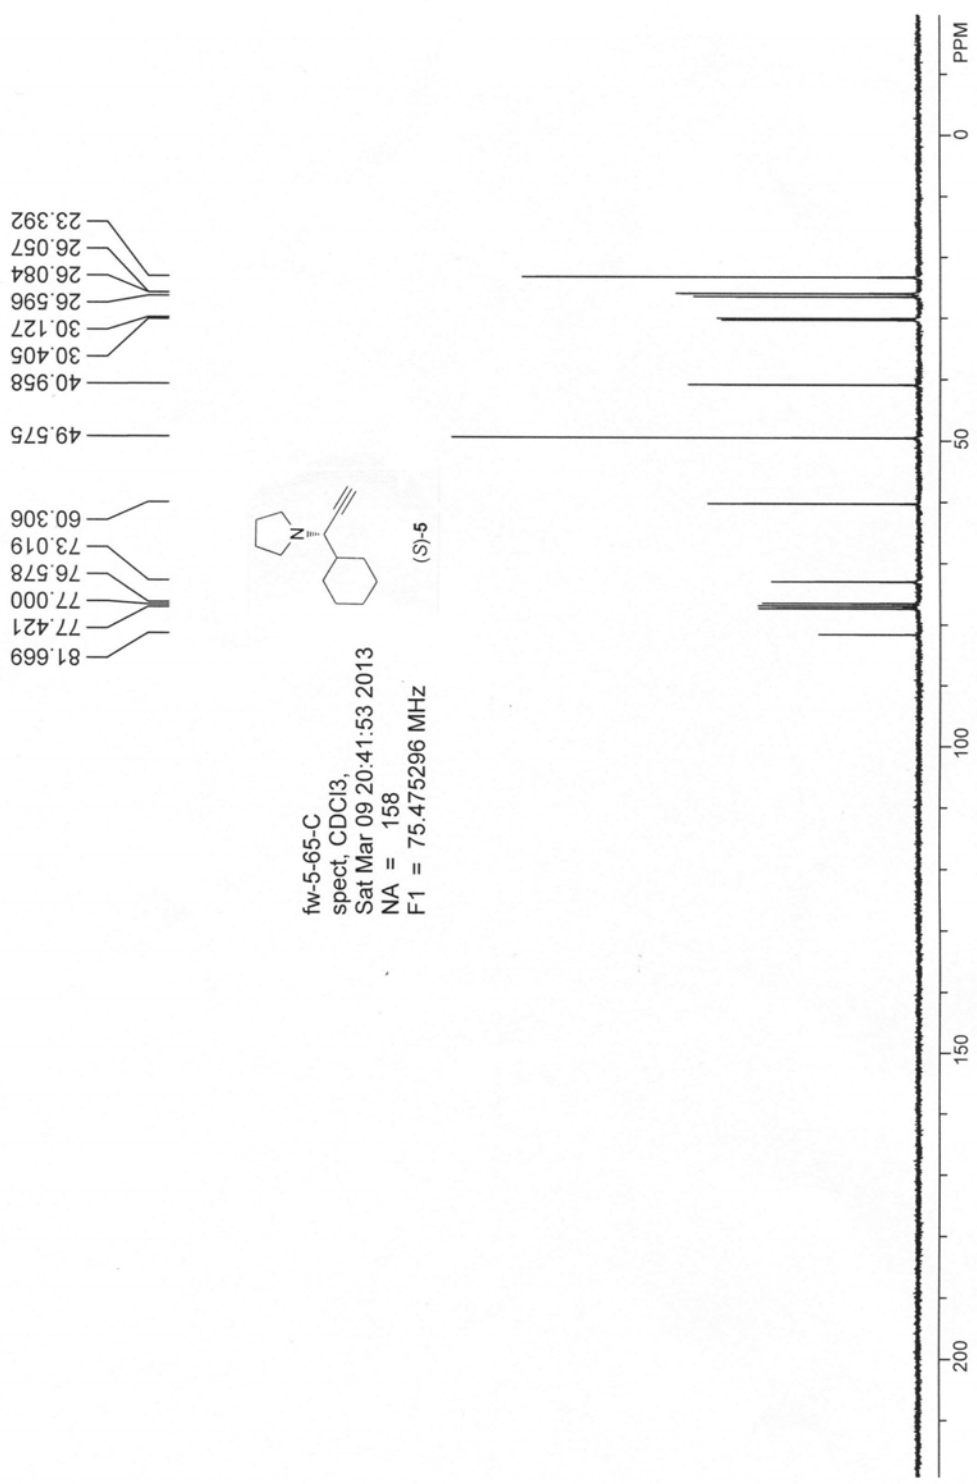

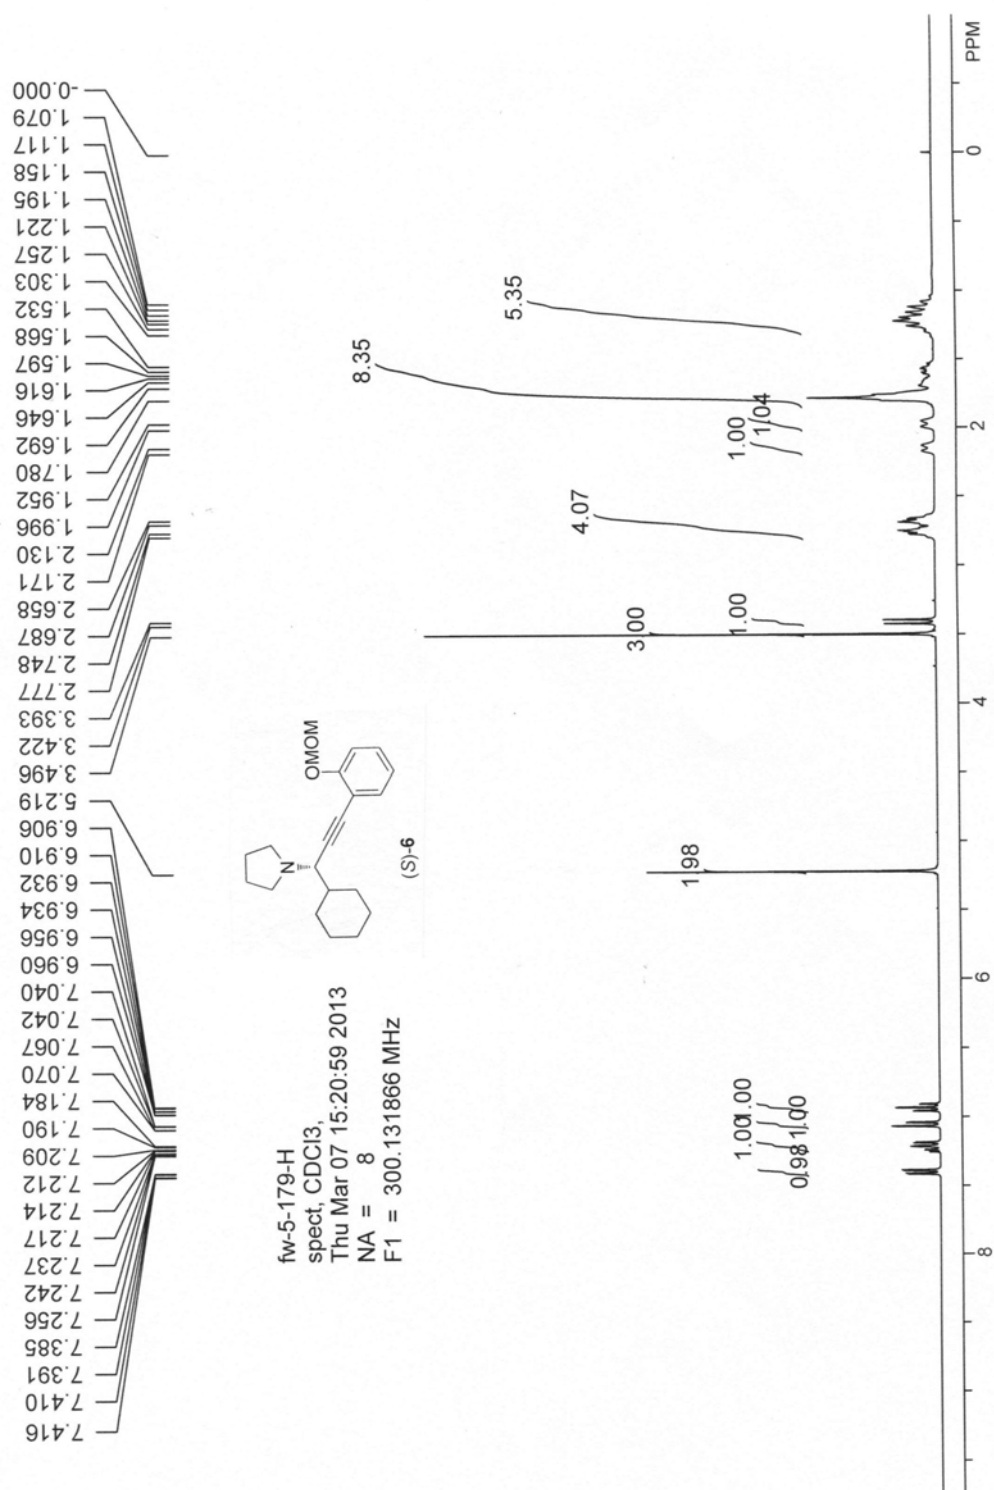

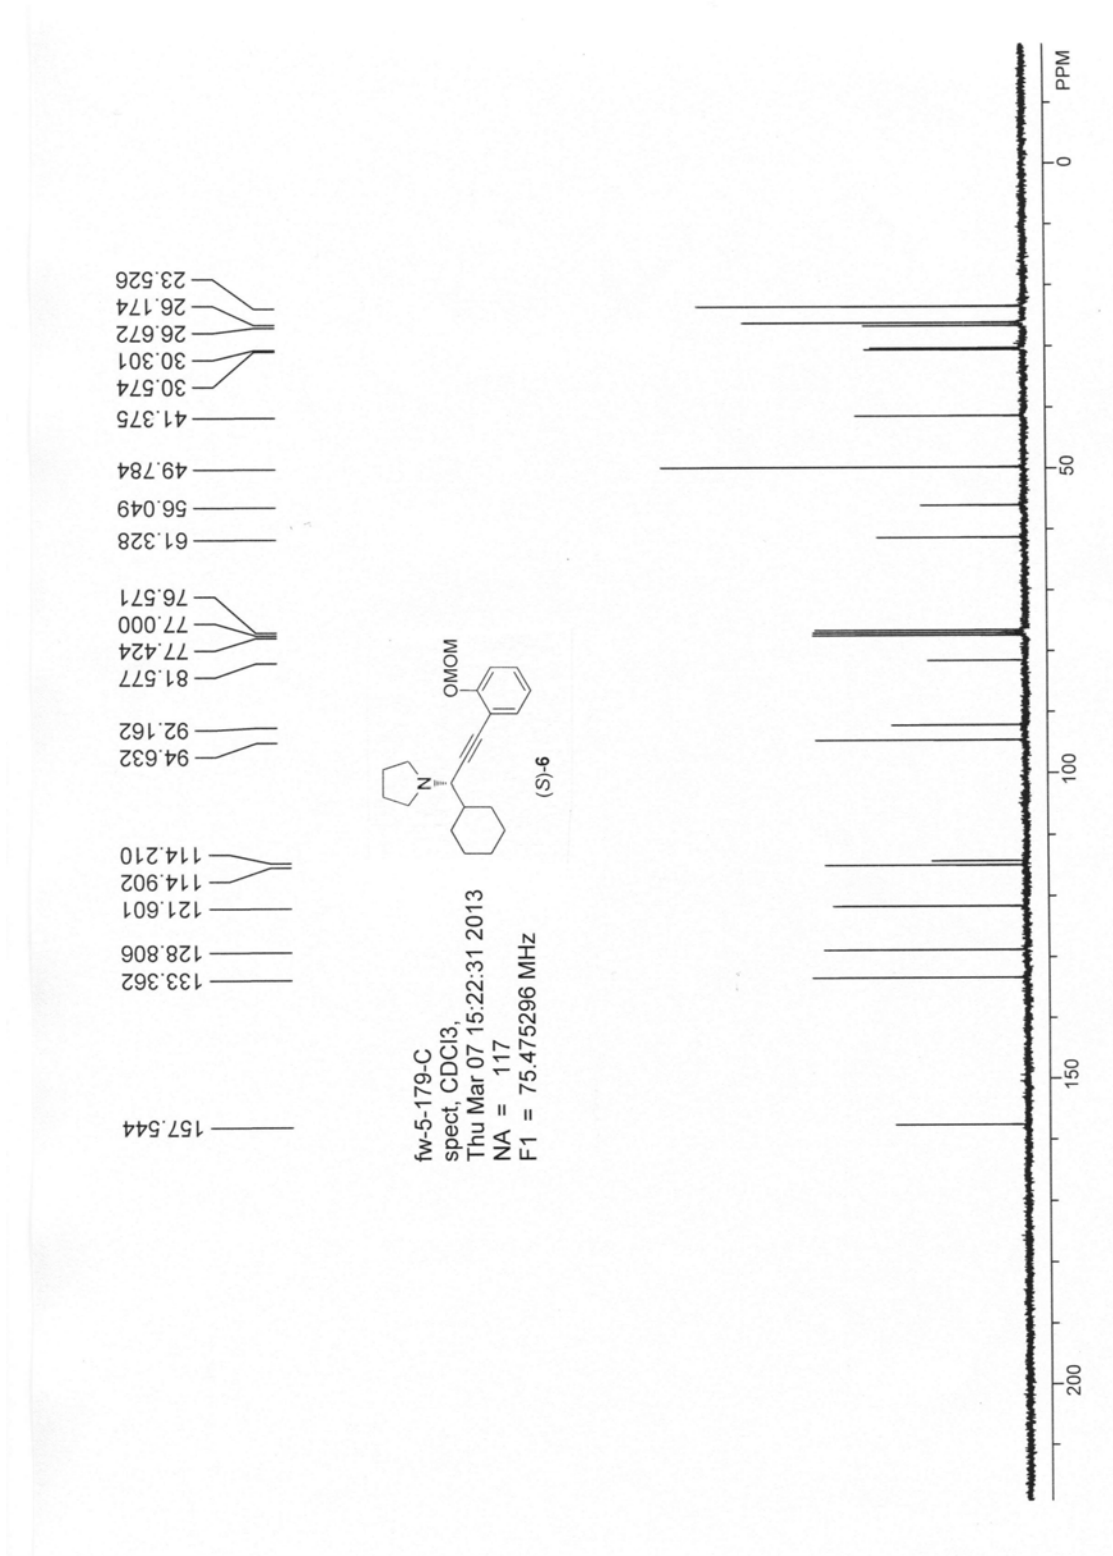



Operator: dell Timebase: U-3000 Sequence: LSH

Page 1-1  
2013-3-7 5:54 下午

326 fw-5-34-od-h-400-1-0.7-220

|                  |                            |                   |          |
|------------------|----------------------------|-------------------|----------|
| Sample Name:     | fw-5-34-od-h-400-1-0.7-220 | Injection Volume: | 20.0     |
| Vial Number:     | 327                        | Channel:          | UV_VIS_1 |
| Sample Type:     | unknown                    | Wavelength:       | 220      |
| Control Program: | test                       | Bandwidth:        | n.a.     |
| Quantif. Method: | test                       | Dilution Factor:  | 1.0000   |
| Recording Time:  | 2013-3-7 17:38             | Sample Weight:    | 1.0000   |
| Run Time (min):  | 15.14                      | Sample Amount:    | 1.0000   |

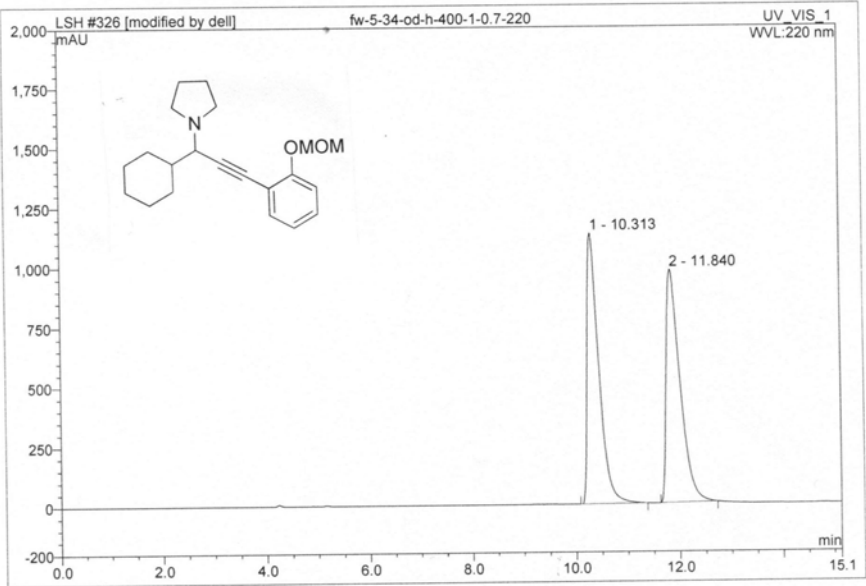

| No.    | Ret. Time<br>min | Peak Name | Height<br>mAU | Area<br>mAU*min | Rel. Area<br>% | Amount | Type |
|--------|------------------|-----------|---------------|-----------------|----------------|--------|------|
| 1      | 10.31            | n.a.      | 1133.585      | 295.101         | 49.68          | n.a.   | BMB* |
| 2      | 11.84            | n.a.      | 974.467       | 298.937         | 50.32          | n.a.   | BMB* |
| Total: |                  |           | 2108.052      | 594.038         | 100.00         | 0.000  |      |

default/Integration

Chromeleon (c) Dionex 1996-2006  
Version 6.80 SR5 Build 2413 (137116)

Operator: dell Timebase: U-3000 Sequence: LSH

Page 1-1  
2013-3-7 5:46 下午

|                                 |                             |                   |          |  |  |
|---------------------------------|-----------------------------|-------------------|----------|--|--|
| 325 fw-5-179-od-h-400-1-0.7-220 |                             |                   |          |  |  |
| Sample Name:                    | fw-5-179-od-h-400-1-0.7-220 | Injection Volume: | 20.0     |  |  |
| Vial Number:                    | 326                         | Channel:          | UV_VIS_1 |  |  |
| Sample Type:                    | unknown                     | Wavelength:       | 220      |  |  |
| Control Program:                | test                        | Bandwidth:        | n.a.     |  |  |
| Quantif. Method:                | test                        | Dilution Factor:  | 1.0000   |  |  |
| Recording Time:                 | 2013-3-7 17:21              | Sample Weight:    | 1.0000   |  |  |
| Run Time (min):                 | 15.95                       | Sample Amount:    | 1.0000   |  |  |

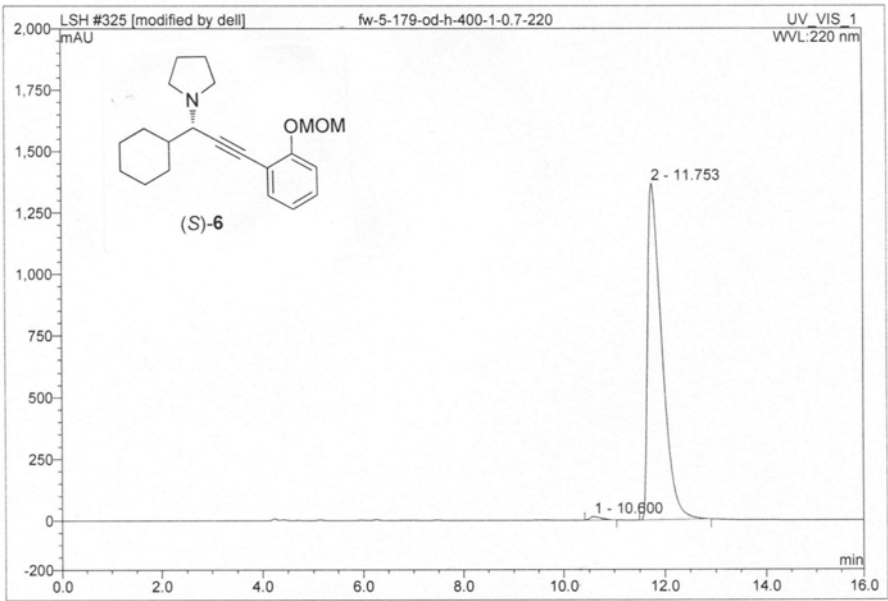

| No.    | Ret.Time<br>min | Peak Name | Height<br>mAU | Area<br>mAU*min | Rel.Area<br>% | Amount | Type |
|--------|-----------------|-----------|---------------|-----------------|---------------|--------|------|
| 1      | 10.60           | n.a.      | 14.042        | 3.589           | 0.80          | n.a.   | BMB* |
| 2      | 11.75           | n.a.      | 1367.227      | 445.094         | 99.20         | n.a.   | BMB* |
| Total: |                 |           | 1381.268      | 448.683         | 100.00        | 0.000  |      |

default/Integration

Chromeleon (c) Dionex 1996-2006  
Version 6.80 SR5 Build 2413 (137116)



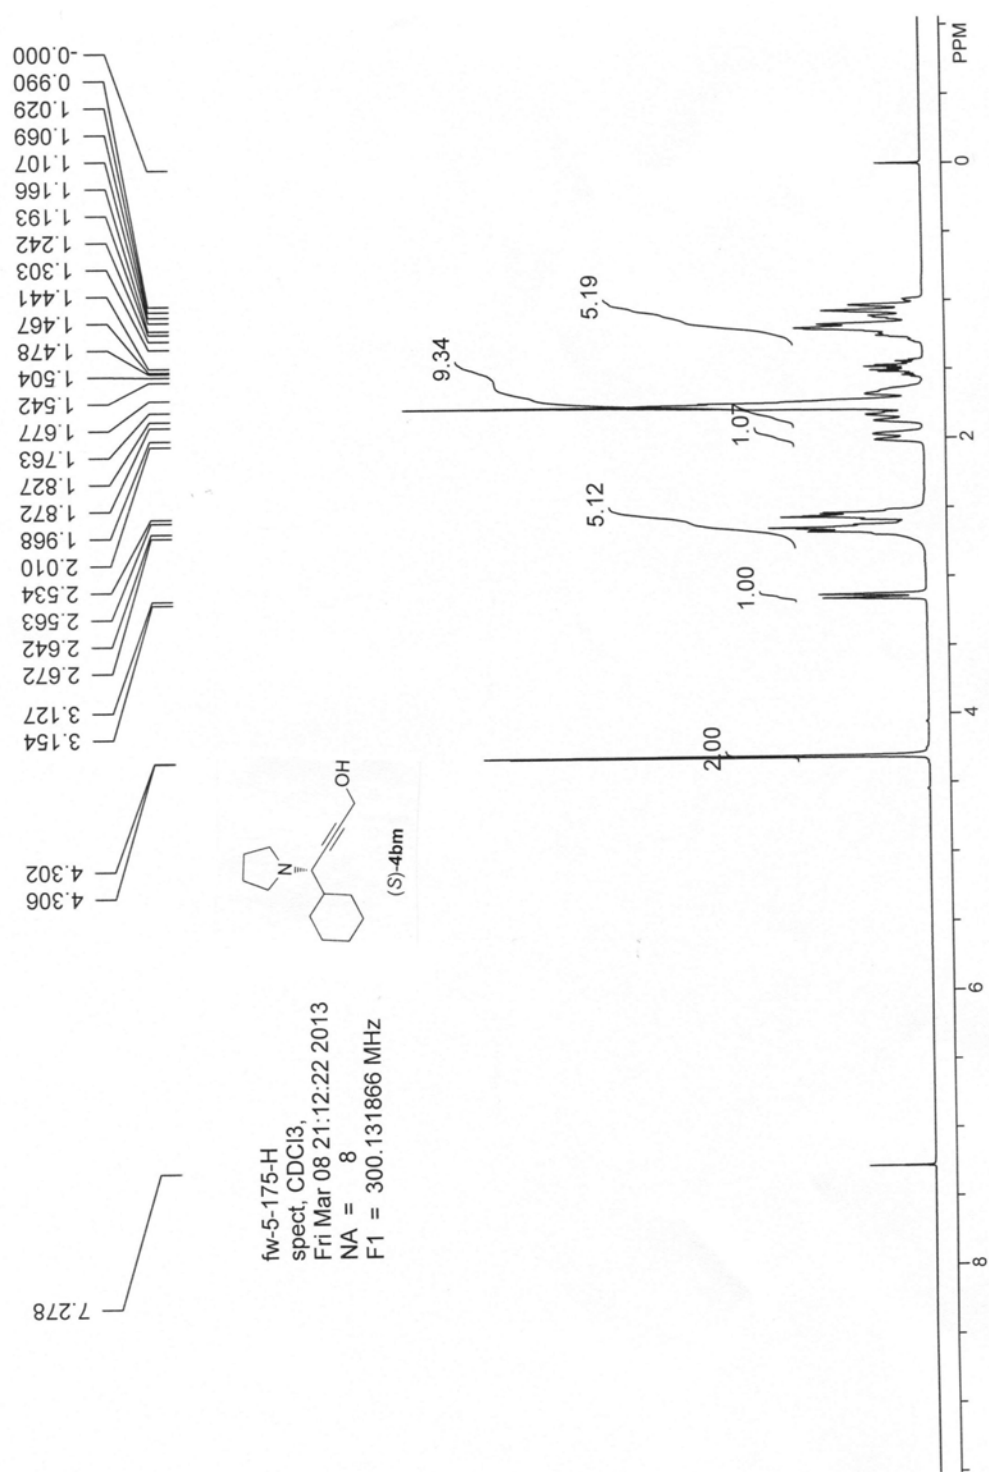

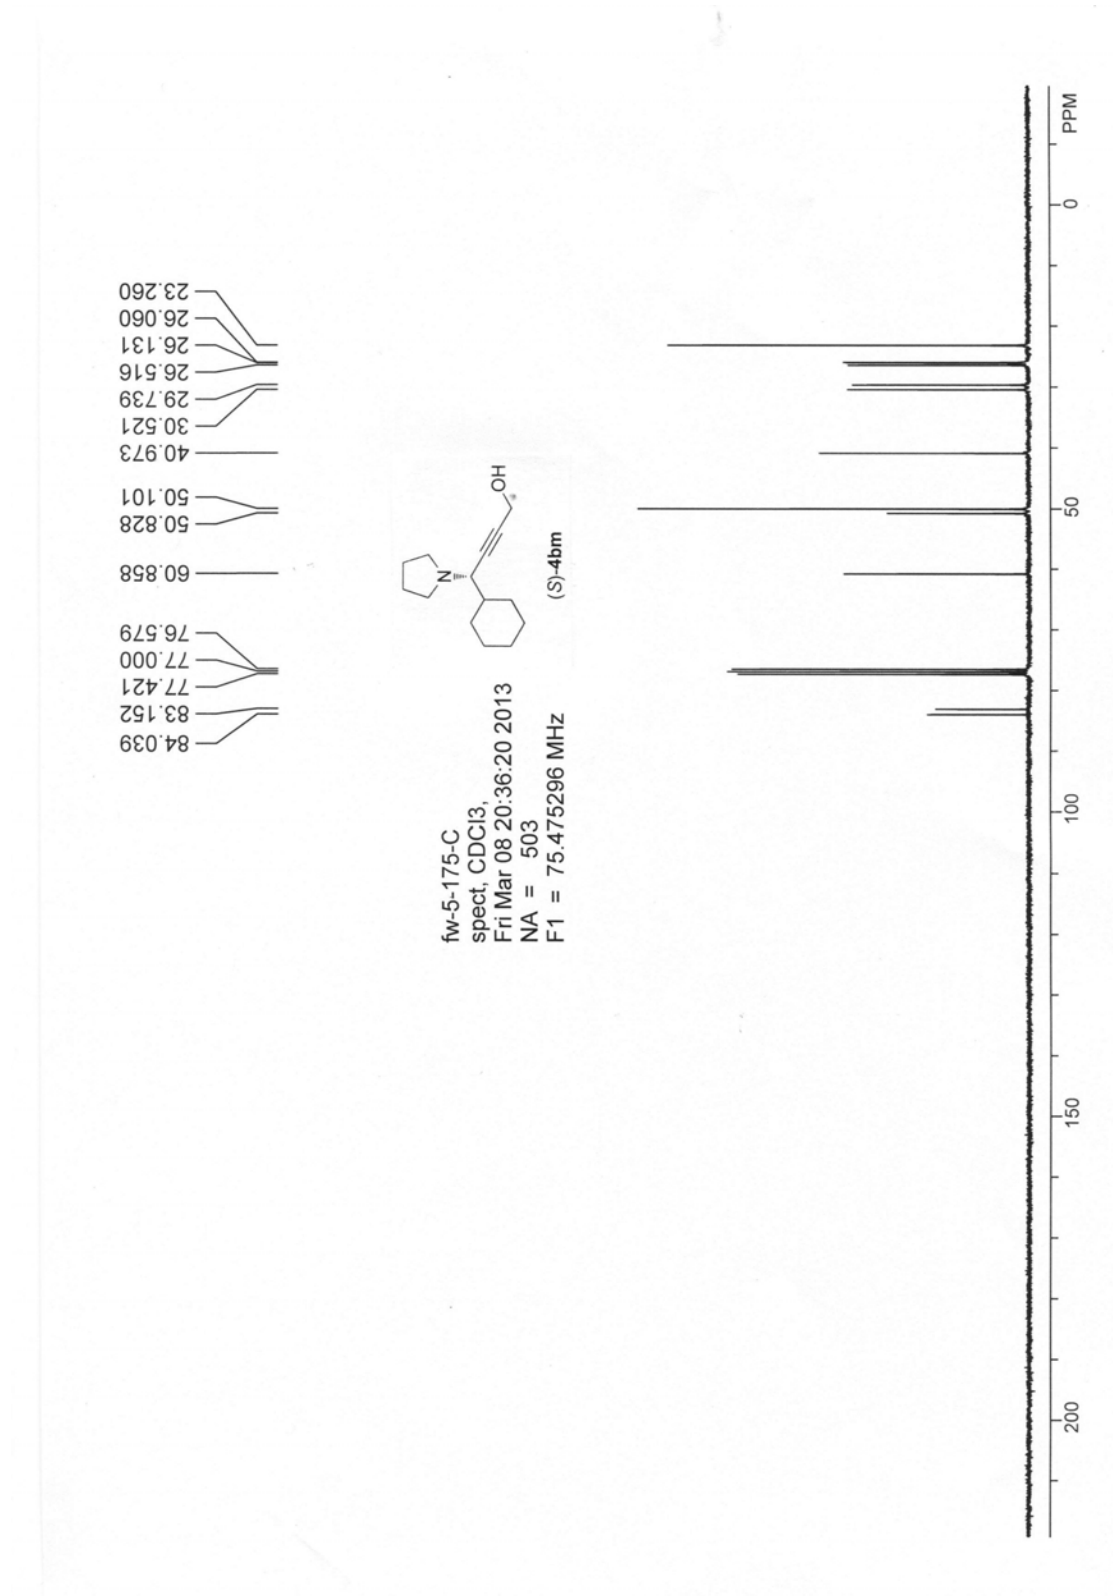

中国科学院上海有机化学研究所

Project Name: defaults for copy  
Reported by User: Breeze user (Breeze)

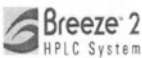

SAMPLE INFORMATION

|                   |                          |                  |                        |
|-------------------|--------------------------|------------------|------------------------|
| Sample Name:      | fw-5-132-adh-90-10-1-214 | Acquired By:     | Breeze                 |
| Sample Type:      | 未知                       | Date Acquired:   | 2013/3/12 10:18:31 CST |
| Vial:             | 1                        | Acq. Method:     | zg90                   |
| Injection #:      | 6                        | Date Processed:  | 2013/3/12 10:37:26 CST |
| Injection Volume: | 10.00 ul                 | Channel Name:    | V2489 ChA              |
| Run Time:         | 200.00 Minutes           | Sample Set Name: |                        |

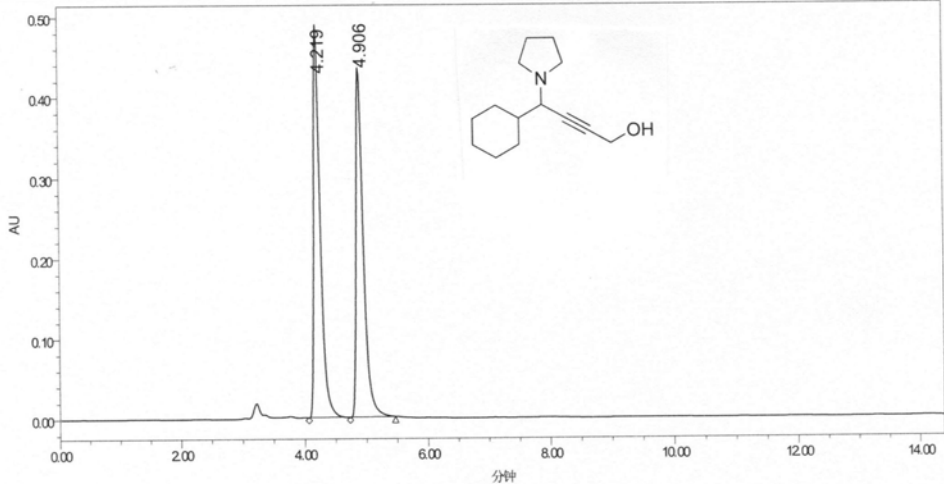

|   | RT<br>(min) | Area<br>(AU*sec) | %Area | Height<br>(AU) | %<br>Height |
|---|-------------|------------------|-------|----------------|-------------|
| 1 | 4.219       | 3666601          | 49.92 | 486232         | 52.78       |
| 2 | 4.906       | 3666423          | 50.08 | 434997         | 47.22       |

中国科学院上海有机化学研究所

Project Name: defaults for copy  
Reported by User: Breeze user (Breeze)

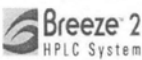

SAMPLE INFORMATION

|                   |                           |                  |                        |
|-------------------|---------------------------|------------------|------------------------|
| Sample Name:      | fw-5-175-ad-h-90-10-1-214 | Acquired By:     | Breeze                 |
| Sample Type:      | 未知                        | Date Acquired:   | 2013/3/12 9:50:08 CST  |
| Vial:             | 1                         | Acq. Method:     | zg30                   |
| Injection #:      | 3                         | Date Processed:  | 2013/3/12 10:38:03 CST |
| Injection Volume: | 10.00 ul                  | Channel Name:    | V2489 CHA              |
| Run Time:         | 200.00 Minutes            | Sample Set Name: |                        |

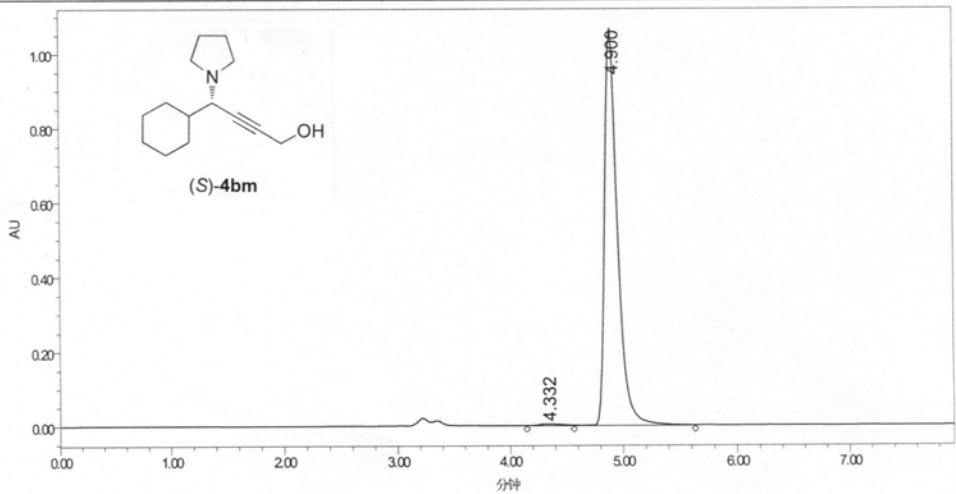

|   | RT<br>(min) | Area<br>(#sec) | %Area | Hight<br>(#) | %<br>Hight |
|---|-------------|----------------|-------|--------------|------------|
| 1 | 4.332       | 71696          | 0.86  | 4621         | 0.43       |
| 2 | 4.900       | 8398602        | 99.15 | 1064817      | 99.57      |

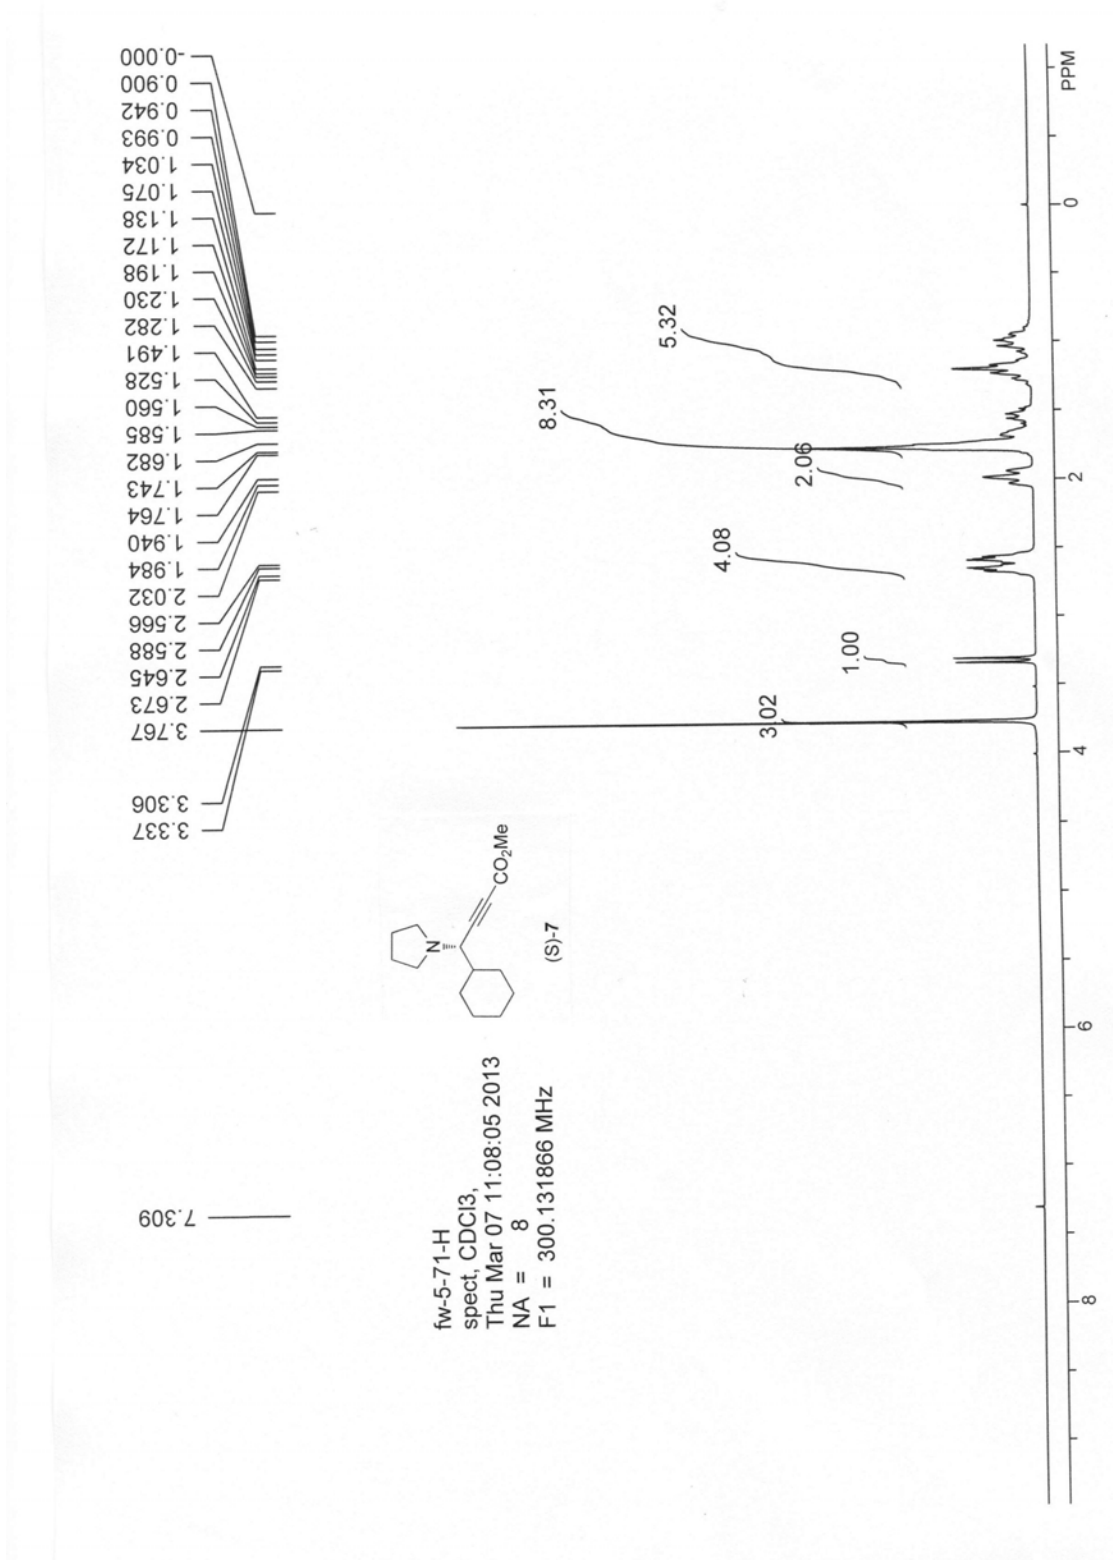

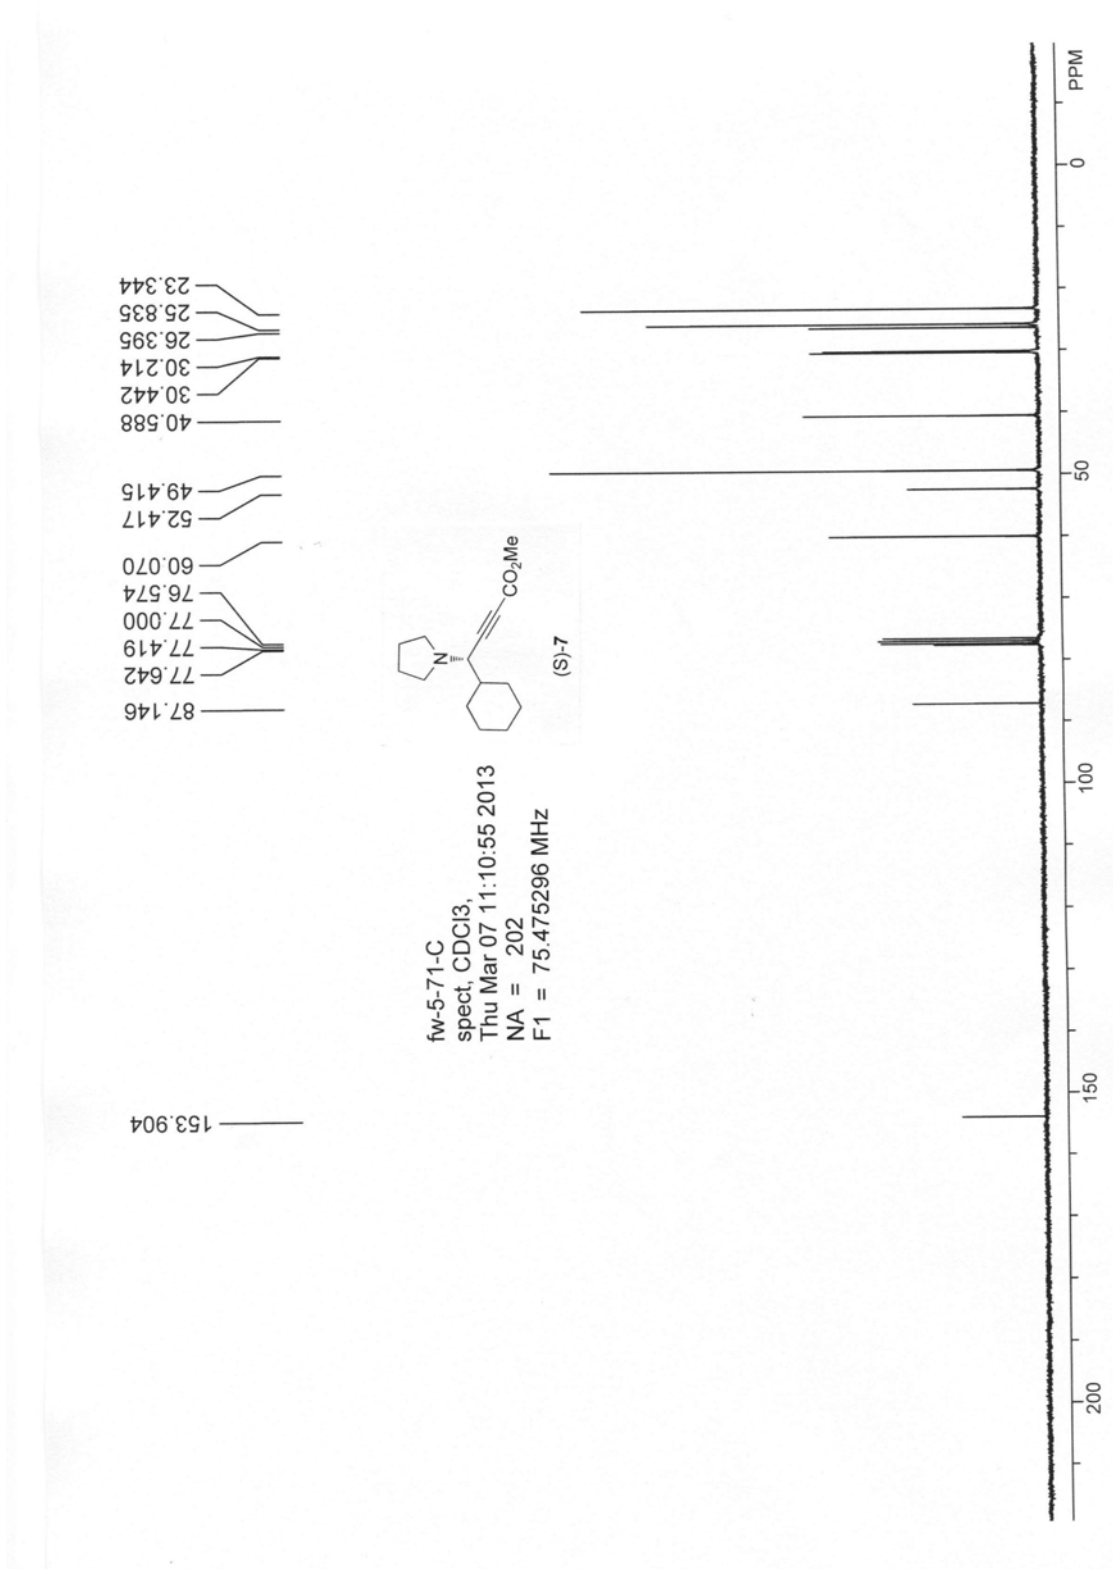



中国科学院上海有机化学研究所  
项目名称 defaults for copy  
用户名称 Breeze user (Breeze)

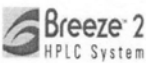

| 样品信息 |                         |        |                 |
|------|-------------------------|--------|-----------------|
| 样品名称 | fw-492-adh-100-0-1-214  | 采集器    | Breeze          |
| 样品类型 | 未知                      | 样品名称   |                 |
| 瓶号   | 1                       | 采集方法   | zg100           |
| 进样次数 | 4                       | 处理方法   | zg2             |
| 进样体积 | 10.00 ul                | 通道名称   | W2489 ChA       |
| 运行时间 | 200.0 Minutes           | 处理通道名称 | W2489 ChA.214nm |
| 采集时间 | 2012/11/22 11:23:50 CST | 色谱类型   | W2489 ChA.214nm |
| 处理时间 | 2012/11/22 11:47:22 CST |        |                 |

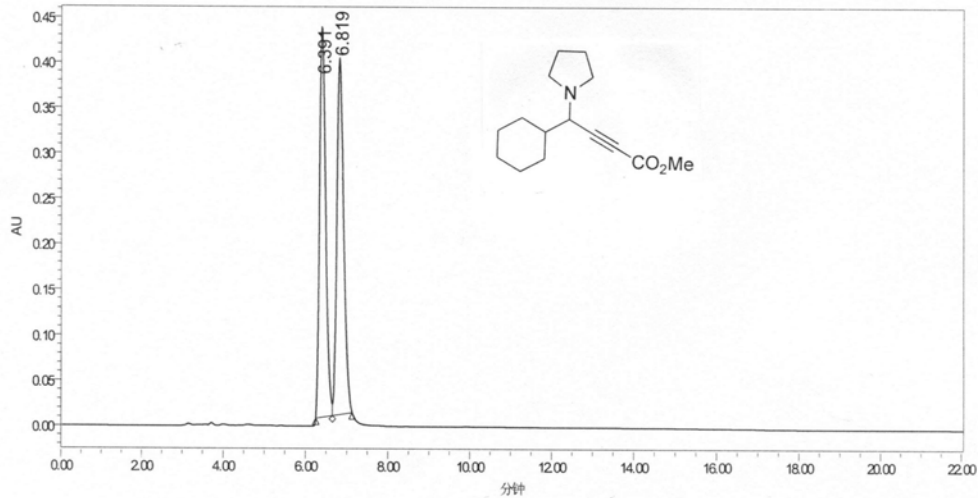

|   | 保留时间<br>(分钟) | 面积<br>(微伏秒) | %面积   | 高度<br>(微伏) | %高度   |
|---|--------------|-------------|-------|------------|-------|
| 1 | 6.391        | 4445209     | 49.40 | 433186     | 52.43 |
| 2 | 6.819        | 4553688     | 50.60 | 392360     | 47.57 |

中国科学院上海有机化学研究所  
项目名称 defaults for copy  
用户名 Breeze user (Breeze)

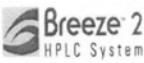

| 样品信息 |                         |        |                 |
|------|-------------------------|--------|-----------------|
| 样品名称 | fw-5-71-adh-100-0-1-214 | 采集器    | Breeze          |
| 样品类型 | 未知                      | 样品名称   |                 |
| 瓶号   | 1                       | 采集方法   | zg100           |
| 进样次数 | 3                       | 处理方法   | zg2             |
| 进样体积 | 10.00 ul                | 通道名称   | V2489 ChA       |
| 运行时间 | 200.0 Minutes           | 处理通道稀释 | V2489 ChA 214nm |
| 采集时间 | 2012/11/22 11:14:40 CST | 色谱类型   | V2489 ChA 214nm |
| 处理时间 | 2012/11/22 11:48:44 CST |        |                 |

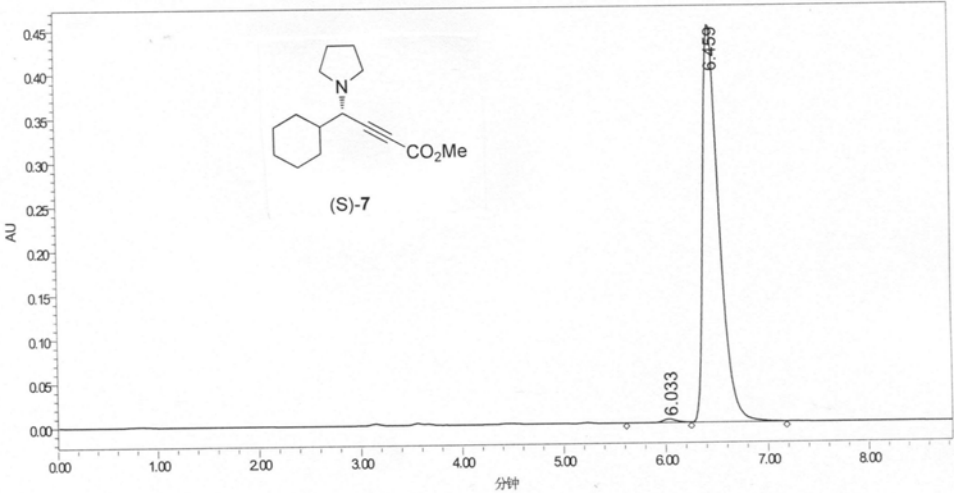

|   | 保留时间<br>(分钟) | 面积<br>(微伏秒) | %面积   | 高度<br>(微伏) | %高度   |
|---|--------------|-------------|-------|------------|-------|
| 1 | 6.033        | 39966       | 0.78  | 3998       | 0.87  |
| 2 | 6.453        | 4938344     | 99.22 | 454137     | 99.13 |
